# Supplementary material for: Identification of Candidate Biomarkers in Malignant Ascites from Patients with Hepatocellular Carcinoma by iTRAQ-Based Quantitative Proteomic Analysis
Source: Biomed Res Int. 2018 Sep 23;2018:5484976. doi: 10.1155/2018/5484976 (PMC6174818; doi:10.1155/2018/5484976)
Supplement: Supplementary 1 — Table S1: characteristics of the 19 enrolled patients are shown. [file 5484976.f1.xls]

## Sheet: Sheet1
Accession	Description	Score	Coverage	# Proteins	# Unique Peptides	# Peptides	# PSMs	HCC_1	HCC_2	HCC_3	HCC_4	HD_1	HD_2	HD_3	HD_4	# AAs	MW [kDa]	calc. pI	Group_HCC.vs.Group_HD	p value
Q6GMX6	IGH@ protein OS=Homo sapiens GN=IGH@ PE=1 SV=1 - [Q6GMX6_HUMAN]	11505.6	56.77	27	2	22	1304	0.892632	1.00267	1.01388	0.935805	1.34599	0.985964	0.927776	0.928136	465	51.0507	8.68994	0.918338	0.465869
A0A087X079	Ig gamma-1 chain C region OS=Homo sapiens GN=IGHG1 PE=1 SV=1 - [A0A087X079_HUMAN]	11395.2	52.01	28	0	20	1316									473	51.8798	8.07471	NA	NA
Q6MZQ6	Putative uncharacterized protein DKFZp686G11190 OS=Homo sapiens GN=DKFZp686G11190 PE=2 SV=1 - [Q6MZQ6_HUMAN]	11374.8	51.79	9	1	20	1290	1.18813	0.771105	1.03018	1.1352	0.862437	0.810218	1.17414	1.0932	475	52.01	8.06006	1.04697	0.730004
A0A087WYC5	Ig gamma-1 chain C region OS=Homo sapiens GN=IGHG1 PE=1 SV=1 - [A0A087WYC5_HUMAN]	11349.5	53.68	25	1	21	1305	0.920888	1.06848	1.05065	1.07488	0.967811	1.10822	0.953503	0.907919	475	52.3929	8.20654	1.04495	0.462939
Q6N089	Putative uncharacterized protein DKFZp686P15220 OS=Homo sapiens GN=DKFZp686P15220 PE=1 SV=1 - [Q6N089_HUMAN]	11337.1	49.58	17	1	19	1283	1.11001	1.10704	1.12431	1.10449	0.848268	0.971901	0.935041	0.945595	472	51.6918	7.92822	1.20103	0.00542893
Q6N094	Putative uncharacterized protein DKFZp686O01196 OS=Homo sapiens GN=DKFZp686O01196 PE=2 SV=1 - [Q6N094_HUMAN]	11312.1	50.21	9	2	20	1262	1.1486	1.10721	1.38451	0.964507	0.935409	0.9712	0.90395	0.856492	480	52.5794	8.17725	1.25641	0.0697188
A0A087X010	Ig gamma-1 chain C region OS=Homo sapiens GN=IGHG1 PE=1 SV=1 - [A0A087X010_HUMAN]	11300.5	49.57	12	1	18	1270	0.711986	1.14076	0.949385	1.01726	0.994661	1.029	1.11744	1.01422	464	50.7904	8.17725	0.919134	0.428663
Q6N095	Putative uncharacterized protein DKFZp686K03196 OS=Homo sapiens GN=DKFZp686K03196 PE=1 SV=1 - [Q6N095_HUMAN]	11262.2	41.89	8	1	17	1248	0.968065	0.761411	1.24861	1.03309	0.77864	0.899433	0.987262	1.00614	475	52.3271	8.57275	1.09262	0.48968
Q7Z351	Putative uncharacterized protein DKFZp686N02209 OS=Homo sapiens GN=DKFZp686N02209 PE=2 SV=1 - [Q7Z351_HUMAN]	11255.9	46.47	9	1	18	1257	0.730009	1.12141	0.768059	0.927832	2.1614	0.673802	0.894975	0.888147	482	52.8186	8.48486	0.768081	0.494756
A0A0A0MS07	Ig gamma-1 chain C region (Fragment) OS=Homo sapiens GN=IGHG1 PE=1 SV=1 - [A0A0A0MS07_HUMAN]	9441.32	66.1	7	1	16	1060	0.701279	0.826924	1.22272	1.10919	1.18915	0.950185	1.06889	1.03702	295	31.963	8.03076	0.909305	0.502977
F6KPG5	Albumin (Fragment) OS=Homo sapiens PE=2 SV=1 - [F6KPG5_HUMAN]	8019.85	77.09	20	54	54	1236	1.4432	0.8246	1.2499	1.37166	0.772118	0.721786	0.931707	0.926379	585	66.488	6.03662	1.45883	0.0624637
A0A087WXL8	Ig gamma-3 chain C region OS=Homo sapiens GN=IGHG3 PE=1 SV=1 - [A0A087WXL8_HUMAN]	6999.51	46.03	17	7	19	794	1.02359	1.47653	1.16406	1.12269	0.493128	0.841623	1.01119	1.02859	517	56.8529	8.25049	1.41867	0.0693931
Q6N093	Putative uncharacterized protein DKFZp686I04196 (Fragment) OS=Homo sapiens GN=DKFZp686I04196 PE=2 SV=1 - [Q6N093_HUMAN]	5934.25	49.64	4	1	17	732	0.576151	1.01262	1.26191	1.21049	1.2974	0.919444	0.924508	0.905397	417	46.0316	7.59131	1.00371	0.984425
Q53H26	Transferrin variant (Fragment) OS=Homo sapiens PE=2 SV=1 - [Q53H26_HUMAN]	4751.12	66.91	14	2	50	725	0.777337	1.18385	1.05955	1.03472	0.778193	1.06441	1.07166	1.11994	698	77.0296	7.03467	1.00545	0.963603
P01024	Complement C3 OS=Homo sapiens GN=C3 PE=1 SV=2 - [CO3_HUMAN]	4715.01	59.77	8	98	98	632	1.12104	0.914498	0.823651	0.824525	1.24234	1.14365	1.02427	1.03941	1663	187.03	6.40479	0.828051	0.0731698
B4E1B2	cDNA FLJ53691, highly similar to Serotransferrin OS=Homo sapiens PE=2 SV=1 - [B4E1B2_HUMAN]	4358.36	66.08	6	2	50	701	2.81259	0.963873	1.04352	1.00424	0.294246	0.281838	0.991946	1.07474	678	74.7834	7.12256	2.20393	0.182875
Q96K68	cDNA FLJ14473 fis, clone MAMMA1001080, highly similar to Homo sapiens SNC73 protein (SNC73) mRNA OS=Homo sapiens PE=2 SV=1 - [Q96K68_HUMAN]	4299.16	40.49	7	2	16	605	0.949591	1.09897	1.15773	1.14125	1.0038	0.76457	1.00574	0.895813	494	53.0542	6.85889	1.18442	0.0639469
Q8NCL6	cDNA FLJ90170 fis, clone MAMMA1000370, highly similar to Ig alpha-1 chain C region OS=Homo sapiens PE=2 SV=1 - [Q8NCL6_HUMAN]	4284.3	37.32	4	1	15	597	1.24558	0.98131	0.971922	0.946272	1.08305	0.943356	1.03616	1.01521	493	53.1903	6.52197	1.01668	0.83418
Q6MZW0	Putative uncharacterized protein DKFZp686J11235 (Fragment) OS=Homo sapiens GN=DKFZp686J11235 PE=1 SV=1 - [Q6MZW0_HUMAN]	4273.01	34.39	4	1	14	594	1.31992	0.905559	1.04879	1.01096	1.27293	0.959934	0.856532	0.879751	506	54.4249	6.771	1.0796	0.566993
Q6N090	Putative uncharacterized protein DKFZp686G21220 (Fragment) OS=Homo sapiens GN=DKFZp686G21220 PE=2 SV=1 - [Q6N090_HUMAN]	4227.84	33.4	1	1	13	562	1.19198	0.885766	0.926503	1.29429	1.11257	0.793689	1.17787	0.854654	506	54.354	6.59521	1.09112	0.537682
Q6MZX7	Putative uncharacterized protein DKFZp686M24218 OS=Homo sapiens GN=DKFZp686M24218 PE=2 SV=1 - [Q6MZX7_HUMAN]	4187.42	34.45	2	0	11	414									476	52.3871	7.76709	NA	NA
P01861	Ig gamma-4 chain C region OS=Homo sapiens GN=IGHG4 PE=1 SV=1 - [IGHG4_HUMAN]	4186.36	56.88	2	0	12	428									327	35.9179	7.35693	NA	NA
Q6ZW64	cDNA FLJ41552 fis, clone COLON2004478, highly similar to Protein Tro alpha1 H,myeloma OS=Homo sapiens PE=2 SV=1 - [Q6ZW64_HUMAN]	4150.76	36.84	2	1	14	577	1.42399	0.913411	1.2204	0.957729	0.976769	0.7919	0.823459	0.853523	494	53.2872	6.52197	1.31021	0.10744
Q6N092	Putative uncharacterized protein DKFZp686K18196 (Fragment) OS=Homo sapiens GN=DKFZp686K18196 PE=2 SV=1 - [Q6N092_HUMAN]	4144.02	34.68	2	2	15	576	1.32651	1.12052	1.00768	0.950441	0.608861	1.37592	0.889374	0.75731	519	56.3879	6.93213	1.21344	0.350909
S6BGE0	IgG H chain OS=Homo sapiens PE=2 SV=1 - [S6BGE0_HUMAN]	4119.64	30	7	1	7	452	0.998271	0.829914	1.14292	1.23985	0.907326	0.87569	0.971029	0.946934	300	32.1611	7.85498	1.1378	0.250485
C0JYY2	Apolipoprotein B (Including Ag(X) antigen) OS=Homo sapiens GN=APOB PE=4 SV=1 - [C0JYY2_HUMAN]	4052.78	41.2	36	88	181	576	1.12294	1.09939	0.782601	0.777671	1.19336	1.08916	1.01918	1.01441	4563	515.236	7.04932	0.876709	0.269488
Q6MZU6	Putative uncharacterized protein DKFZp686C15213 OS=Homo sapiens GN=DKFZp686C15213 PE=2 SV=1 - [Q6MZU6_HUMAN]	3983.8	43.1	5	1	17	639	0.719799	1.2253	2.95984	0.864575	0.595841	0.728703	0.661355	0.626222	464	51.0662	7.7085	2.20904	0.224085
S6B2A6	IgG H chain OS=Homo sapiens PE=2 SV=1 - [S6B2A6_HUMAN]	3898.86	28	6	3	8	392	1.03526	0.852526	1.33852	1.2293	1.46379	0.749767	0.932866	0.838205	300	32.1469	7.25439	1.11819	0.567162
A0A087WYL9	Ig kappa chain C region OS=Homo sapiens GN=IGKC PE=1 SV=1 - [A0A087WYL9_HUMAN]	3893.11	54.7	10	2	9	494	0.883671	1.10804	1.15154	0.978385	1.10635	0.900677	0.964833	0.896034	234	25.6147	8.49951	1.06567	0.450188
S6BGD4	IgG H chain OS=Homo sapiens PE=2 SV=1 - [S6BGD4_HUMAN]	3812.21	17.09	6	1	4	282	0.868278	0.879515	1.14003	1.18663	0.897681	0.958545	1.11959	0.988459	234	24.9997	9.48096	1.02774	0.787398
S6C4R2	IgG H chain OS=Homo sapiens PE=1 SV=1 - [S6C4R2_HUMAN]	3790.97	20.73	7	1	5	283	1.43062	0.953172	1.14663	1.03198	0.725592	0.848358	1.025	1.01414	275	28.8143	8.27979	1.26294	0.11658
S6B2B6	IgG H chain OS=Homo sapiens PE=2 SV=1 - [S6B2B6_HUMAN]	3770.81	19.27	7	3	6	279	0.944958	0.975501	1.31334	1.01422	1.07527	0.883151	0.992779	0.994092	275	29.3417	8.67529	1.07681	0.461151
S6C4S0	IgG H chain OS=Homo sapiens PE=1 SV=1 - [S6C4S0_HUMAN]	3768.37	16	13	1	5	287	0.889308	1.01043	1.199	1.04272	0.880419	0.972396	1.13059	0.966394	275	29.3794	8.1626	1.04862	0.582833
A0A0M3KKW6	Fab Hu 15C1 Heavy chain OS=Homo sapiens PE=1 SV=1 - [A0A0M3KKW6_HUMAN]	3749.75	21.33	8	1	5	279	1.00968	1.00163	1.24958	0.969413	0.98551	1.16919	0.964795	0.839976	225	24.059	8.85107	1.06843	0.497011
Q0KKI6	Immunoblobulin light chain (Fragment) OS=Homo sapiens PE=1 SV=1 - [Q0KKI6_HUMAN]	3517.74	48.4	12	1	8	461	1.0673	1.26478	1.08055	0.92737	0.950165	0.90196	0.939707	1.05532	219	24.015	8.06006	1.12815	0.178731
A0A087X130	Ig kappa chain C region OS=Homo sapiens GN=IGKC PE=1 SV=1 - [A0A087X130_HUMAN]	3419.74	52.81	2	1	8	462	1.24847	1.0727	0.983026	1.21083	0.881055	1.06869	1.04406	1.00048	231	25.1204	6.31592	1.13045	0.136743
A0A087WZW8	Protein IGKV3-11 OS=Homo sapiens GN=IGKV3-11 PE=4 SV=1 - [A0A087WZW8_HUMAN]	3372.54	52.79	9	2	9	463	0.979891	1.19457	0.992903	0.928672	1.04764	1.02385	0.990905	0.951736	233	25.5847	6.01123	1.02042	0.759172
Q6GMX0	Uncharacterized protein OS=Homo sapiens PE=1 SV=1 - [Q6GMX0_HUMAN]	3359.27	44.49	6	1	7	450	0.657937	1.51643	0.847309	1.13902	1.38283	0.951229	1.0409	0.682421	236	25.7908	7.97217	1.02539	0.917031
Q6P5S8	IGK@ protein OS=Homo sapiens GN=IGK@ PE=1 SV=1 - [Q6P5S8_HUMAN]	3340.78	50	7	1	9	459	1.0514	1.32937	1.01969	1.22884	0.845846	0.812196	0.794986	1.07406	236	25.7568	6.32861	1.31245	0.0312798
Q6PIL8	IGK@ protein OS=Homo sapiens GN=IGK@ PE=1 SV=1 - [Q6PIL8_HUMAN]	3330.11	50	8	1	9	453	1.10151	1.48446	1.13966	1.04142	0.748979	0.943115	0.89023	0.935462	236	25.8179	6.55127	1.35542	0.043603
V9HW34	Epididymis luminal protein 213 OS=Homo sapiens GN=HEL-213 PE=2 SV=1 - [V9HW34_HUMAN]	3318.64	52.34	8	1	9	454	0.748017	1.12969	0.915049	1.07344	0.802227	1.04677	1.14818	1.23425	235	25.6299	6.55127	0.913732	0.499273
Q5EFE6	Anti-RhD monoclonal T125 kappa light chain OS=Homo sapiens PE=2 SV=1 - [Q5EFE6_HUMAN]	3289.16	47.01	2	2	7	448	0.526656	0.690764	1.59435	1.76937	0.872434	0.651213	0.632804	1.24259	234	25.6817	8.42627	1.34775	0.4369
Q7Z3Y4	Uncharacterized protein OS=Homo sapiens PE=1 SV=1 - [Q7Z3Y4_HUMAN]	3266.01	41.1	6	1	7	446	1.03626	0.837075	1.26356	1.3242	0.935062	0.775744	1.0384	1.04266	236	25.6857	7.59131	1.17642	0.251109
Q8N5F4	IGL@ protein OS=Homo sapiens GN=IGL@ PE=1 SV=1 - [Q8N5F4_HUMAN]	3223.15	42.92	7	0	10	499									233	24.9452	5.33838	NA	NA
P01023	Alpha-2-macroglobulin OS=Homo sapiens GN=A2M PE=1 SV=3 - [A2MG_HUMAN]	3179.5	47.83	8	49	57	443	1.41167	0.785651	0.919913	0.924882	0.801907	1.40479	0.972689	0.954351	1474	163.188	6.45557	0.977987	0.908137
Q6PIQ7	IGL@ protein OS=Homo sapiens GN=IGL@ PE=1 SV=1 - [Q6PIQ7_HUMAN]	3128.67	42.8	13	1	11	503	0.811774	0.883367	0.659878	0.748781	2.23077	1.49454	0.683875	0.680151	236	25.0053	7.97217	0.609823	0.275325
Q6IPQ0	IGL@ protein OS=Homo sapiens GN=IGL@ PE=2 SV=1 - [Q6IPQ0_HUMAN]	3083.49	41.53	7	1	9	488	1.27677	1.02541	1.13519	1.00629	1.04328	0.815431	0.97886	0.976162	236	24.8081	6.75635	1.16522	0.0960739
Q6GMX4	IGL@ protein OS=Homo sapiens GN=IGL@ PE=1 SV=1 - [Q6GMX4_HUMAN]	3083.49	41.53	9	1	9	488	1.17713	1.46323	0.872436	0.946487	0.794898	1.29056	0.78316	0.80019	236	24.7941	6.88818	1.21504	0.321067
A0A075B6H6	Ig kappa chain C region (Fragment) OS=Homo sapiens GN=IGKC PE=1 SV=1 - [A0A075B6H6_HUMAN]	2974.47	80.37	1	1	6	324	0.97324	0.931054	1.2027	1.24991	1.19073	0.825744	0.972807	0.896557	107	11.7117	5.87158	1.12092	0.337065
A0A5E4	Uncharacterized protein OS=Homo sapiens PE=2 SV=1 - [A0A5E4_HUMAN]	2871.71	38.72	8	1	9	454	0.569495	1.29416	0.899664	0.918066	1.41545	1.19755	0.936058	1.07969	235	24.7312	5.93506	0.795204	0.240791
Q5FWF9	IGL@ protein OS=Homo sapiens GN=IGL@ PE=1 SV=1 - [Q5FWF9_HUMAN]	2799.13	48.28	6	2	11	358	1.1849	0.86988	1.12099	1.04877	1.08916	0.810025	0.988676	0.863907	232	24.7792	5.59229	1.12607	0.248828
Q6GMV8	Uncharacterized protein OS=Homo sapiens PE=2 SV=1 - [Q6GMV8_HUMAN]	2785.03	45.3	6	1	10	442	1.29472	0.969525	1.28124	1.03542	0.850617	0.708865	1.03268	1.06816	234	24.8943	6.66846	1.2513	0.0995743
Q6IN99	IGL@ protein OS=Homo sapiens GN=IGL@ PE=2 SV=1 - [Q6IN99_HUMAN]	2744.93	41.7	6	1	10	447	0.833746	0.982457	1.17834	1.13247	0.973155	1.15027	0.94326	0.896827	235	24.8722	6.7417	1.04113	0.686479
S6BGD6	IgG L chain OS=Homo sapiens PE=1 SV=1 - [S6BGD6_HUMAN]	2739.52	48.51	8	1	11	451	1.06742	0.989544	1.03223	1.05962	0.965328	1.00661	1.09359	0.997248	235	24.8081	7.23975	1.02117	0.538879
Q8NEJ1	Uncharacterized protein OS=Homo sapiens PE=2 SV=1 - [Q8NEJ1_HUMAN]	2717.73	50	8	2	12	448	1.11747	0.803388	0.927486	0.967921	1.16206	1.16197	1.10473	0.946928	236	25.0083	7.69385	0.871801	0.142022
Q567P1	IGL@ protein OS=Homo sapiens GN=IGL@ PE=2 SV=1 - [Q567P1_HUMAN]	2703.47	42.98	10	1	10	445	0.840029	1.17846	0.958413	1.02354	0.894312	1.22517	1.13912	0.880733	235	24.7841	7.29834	0.966417	0.76699
Q6GMX3	IGL@ protein OS=Homo sapiens GN=IGL@ PE=2 SV=1 - [Q6GMX3_HUMAN]	2703.47	37.71	6	1	9	437	1.45226	0.76659	0.960516	0.872977	1.25023	0.825792	0.940162	1.21169	236	24.6851	6.88818	0.958609	0.820464
A0A087X2C0	Ig mu chain C region OS=Homo sapiens GN=IGHM PE=1 SV=1 - [A0A087X2C0_HUMAN]	2590.7	41.67	18	3	21	358	0.89534	1.4214	1.01934	1.07399	0.814987	1.1082	0.855247	0.854743	588	64.0658	7.13721	1.2136	0.200472
S6AWE6	IgG L chain OS=Homo sapiens PE=2 SV=1 - [S6AWE6_HUMAN]	2567.24	36.28	3	1	8	384	0.8098	0.687589	1.42494	1.32772	0.73783	0.973509	1.02884	1.24778	215	22.8914	8.42627	1.06568	0.770043
Q6ZVX0	cDNA FLJ41981 fis, clone SMINT2011888, highly similar to Protein Tro alpha1 H,myeloma OS=Homo sapiens PE=2 SV=1 - [Q6ZVX0_HUMAN]	2556.3	35.73	7	1	13	366	1.26371	0.885509	1.09792	1.06698	1.43013	0.881008	0.802157	0.831456	487	52.841	5.92236	1.09407	0.606763
S6BAR0	IgG L chain OS=Homo sapiens PE=2 SV=1 - [S6BAR0_HUMAN]	2548.47	34.72	3	2	8	390	1.02012	1.03152	1.00316	0.944291	1.41066	0.951781	0.875237	0.878844	216	23.1073	7.69385	0.971338	0.834403
Q6P089	IGH@ protein OS=Homo sapiens GN=IGH@ PE=2 SV=1 - [Q6P089_HUMAN]	2530.75	33.13	3	1	12	335	0.74837	1.03852	1.10088	1.13677	1.04063	0.868098	1.11743	1.02437	480	51.9646	6.31592	0.993827	0.953896
Q9NPP6	Immunoglobulin heavy chain variant (Fragment) OS=Homo sapiens PE=2 SV=1 - [Q9NPP6_HUMAN]	2515.32	39.9	3	1	13	342	1.07403	0.889631	1.17597	1.06435	1.43333	0.763159	0.94753	0.951571	416	44.758	6.12549	1.02637	0.870243
S6C4Q9	IgG L chain OS=Homo sapiens PE=2 SV=1 - [S6C4Q9_HUMAN]	2496.37	23.96	2	1	6	283									217	22.8433	6.75635	NA	NA
Q7Z374	Putative uncharacterized protein DKFZp686C02218 (Fragment) OS=Homo sapiens GN=DKFZp686C02218 PE=2 SV=1 - [Q7Z374_HUMAN]	2456.84	33.33	3	1	12	329	1.3669	1.02651	0.87456	0.957725	0.986301	1.04519	0.765415	1.15835	492	53.7418	7.04932	1.06904	0.634733
Q7Z379	Putative uncharacterized protein DKFZp686K04218 (Fragment) OS=Homo sapiens GN=DKFZp686K04218 PE=2 SV=1 - [Q7Z379_HUMAN]	2422.3	28.45	1	1	10	311	1.03516	0.950652	1.02103	1.0338	1.09621	1.05904	0.950934	0.962615	478	51.5877	6.52197	0.993119	0.871223
Q86TT1	Full-length cDNA clone CS0DD006YL02 of Neuroblastoma of Homo sapiens (human) OS=Homo sapiens PE=2 SV=1 - [Q86TT1_HUMAN]	2246.22	53.6	1	2	17	257	1.0303	1.38489	1.12107	1.12823	0.52211	1.00543	0.973565	0.878743	375	41.2465	6.78564	1.37988	0.059846
P01009	Alpha-1-antitrypsin OS=Homo sapiens GN=SERPINA1 PE=1 SV=3 - [A1AT_HUMAN]	2169.47	61.24	24	23	29	458	1.17564	1.08796	0.945256	0.91566	1.45732	0.700917	0.930114	0.939753	418	46.707	5.59229	1.02408	0.894402
P0C0L5	Complement C4-B OS=Homo sapiens GN=C4B PE=1 SV=2 - [CO4B_HUMAN]	1983.86	36.87	14	3	61	274	1.05911	0.739208	0.879004	0.744374	1.13537	1.27994	1.30271	1.09992	1744	192.631	7.26904	0.710046	0.0109255
Q9Y509	VH3 protein (Fragment) OS=Homo sapiens GN=VH3 PE=2 SV=1 - [Q9Y509_HUMAN]	1859.64	15.65	1	1	2	150	1.16718	1.05666	1.18408	1.13993	0.838942	0.799497	0.928602	1.05611	147	15.7587	8.38232	1.25531	0.018784
Q0ZCH9	Immunglobulin heavy chain variable region (Fragment) OS=Homo sapiens PE=4 SV=1 - [Q0ZCH9_HUMAN]	1826.79	47.11	18	1	5	122	1.30973	0.802729	1.16189	0.967064	1.12774	0.882737	0.998336	1.03573	121	13.4275	8.45557	1.0487	0.706038
Q6N091	Putative uncharacterized protein DKFZp686C02220 (Fragment) OS=Homo sapiens GN=DKFZp686C02220 PE=2 SV=1 - [Q6N091_HUMAN]	1783.97	24.8	7	2	10	262	1.39526	0.933589	1.07186	1.06509	0.960743	0.958675	0.903834	1.01064	500	54.1255	6.34131	1.16454	0.206422
P0C0L4	Complement C4-A OS=Homo sapiens GN=C4A PE=1 SV=2 - [CO4A_HUMAN]	1767.75	35.32	11	2	60	262	0.817814	0.989519	1.01948	0.917216	1.57504	0.919057	0.802	0.876912	1744	192.664	7.07861	0.897196	0.597459
P00738	Haptoglobin OS=Homo sapiens GN=HP PE=1 SV=1 - [HPT_HUMAN]	1764	56.4	15	12	24	424	1.07889	1.11267	0.807675	0.812463	1.04176	0.920358	1.13092	1.16576	406	45.1766	6.58057	0.895046	0.309925
Q6N041	Putative uncharacterized protein DKFZp686O16217 (Fragment) OS=Homo sapiens GN=DKFZp686O16217 PE=2 SV=1 - [Q6N041_HUMAN]	1750.12	23.49	7	2	10	259	1.38008	0.546689	1.28575	1.48463	1.67035	0.816698	0.532009	0.53092	498	54.0905	7.18115	1.32338	0.437001
P01766	Ig heavy chain V-III region BRO OS=Homo sapiens PE=1 SV=1 - [HV305_HUMAN]	1739.84	34.17	5	1	3	111	1.29481	1.0658	0.889551	1.02328	0.923508	0.989015	1.00475	0.995459	120	13.2184	6.56592	1.09226	0.366256
A0A087WW89	Protein IGHV3-72 OS=Homo sapiens GN=IGHV3-72 PE=1 SV=1 - [A0A087WW89_HUMAN]	1691.61	60.4	5	2	5	95	0.967639	1.21545	1.05727	1.01685	0.785764	1.11187	1.07106	0.880916	101	11.1604	7.97217	1.10571	0.325905
Q9UL72	Myosin-reactive immunoglobulin heavy chain variable region (Fragment) OS=Homo sapiens PE=2 SV=1 - [Q9UL72_HUMAN]	1673.77	34.75	3	1	3	78	1.09811	0.756547	0.886943	0.906286	1.34182	1.07199	1.16878	0.994432	118	12.8642	6.58057	0.797029	0.0647846
S4R460	Protein IGHV3OR16-9 OS=Homo sapiens GN=IGHV3OR16-9 PE=1 SV=2 - [S4R460_HUMAN]	1633.85	40.63	5	1	3	77	1.01289	0.939634	1.07798	1.07224	1.11557	0.948443	0.993621	1.03686	96	10.423	7.97217	1.00195	0.968157
A0A068LKR4	Ig heavy chain variable region (Fragment) OS=Homo sapiens PE=2 SV=1 - [A0A068LKR4_HUMAN]	1632.93	22.03	2	1	2	72	1.39851	0.96896	1.31197	1.13654	0.563635	0.61707	1.21284	1.106	118	12.8212	6.01123	1.37629	0.148859
P02790	Hemopexin OS=Homo sapiens GN=HPX PE=1 SV=2 - [HEMO_HUMAN]	1610.15	48.27	11	19	19	201	0.77816	0.941428	0.988018	0.940272	0.779926	1.4003	1.1127	1.14913	462	51.6433	7.02002	0.821027	0.220156
S6C4R7	IgG L chain OS=Homo sapiens PE=2 SV=1 - [S6C4R7_HUMAN]	1501.93	32.08	1	1	6	289	1.25632	0.701044	1.21157	1.09611	1.04157	1.06664	0.843501	0.979008	212	22.4992	8.23584	1.08469	0.573781
P02763	Alpha-1-acid glycoprotein 1 OS=Homo sapiens GN=ORM1 PE=1 SV=1 - [A1AG1_HUMAN]	1422.43	47.76	1	5	9	192	0.563561	0.96321	0.956552	0.930565	1.33704	1.27502	0.971084	1.01277	201	23.4968	5.021	0.743037	0.069136
P02671	Fibrinogen alpha chain OS=Homo sapiens GN=FGA PE=1 SV=2 - [FIBA_HUMAN]	1403.16	31.76	5	23	26	242	0.785697	0.859832	0.864067	0.864721	1.4001	1.02955	1.10835	1.1438	866	94.9144	6.01123	0.720846	0.0233749
A0A075B6L1	Ig lambda-7 chain C region (Fragment) OS=Homo sapiens GN=IGLC7 PE=1 SV=2 - [A0A075B6L1_HUMAN]	1385.83	57.55	2	2	5	251	1.24859	0.86896	1.20207	1.18435	1.05016	0.809307	0.863913	0.975664	106	11.2996	8.29443	1.21763	0.106003
S6AWD6	IgG L chain OS=Homo sapiens PE=2 SV=1 - [S6AWD6_HUMAN]	1349.31	40.45	4	3	6	219	1.02896	1.09098	1.09494	1.09097	0.920701	0.9393	0.983582	1.12097	178	19.4378	8.45557	1.086	0.155181
S6B294	IgG L chain OS=Homo sapiens PE=2 SV=1 - [S6B294_HUMAN]	1327.37	27.57	4	1	4	219	0.86908	1.06013	0.986888	1.05585	1.07642	0.994119	0.891965	1.25046	185	20.0972	8.71924	0.94302	0.525807
S6AWD3	IgG L chain OS=Homo sapiens PE=2 SV=1 - [S6AWD3_HUMAN]	1231.86	23.5	4	1	4	214	1.15112	0.897643	1.17125	0.764851	1.67271	0.748726	1.02147	0.801312	183	19.9291	8.90967	0.938973	0.795204
S6BGE9	IgG L chain OS=Homo sapiens PE=2 SV=1 - [S6BGE9_HUMAN]	1227.72	27.87	4	1	5	217	1.10022	1.05553	1.09728	1.07797	1.01078	0.829379	0.891681	1.1476	183	19.9151	8.89502	1.11624	0.20709
B7Z5Q2	cDNA FLJ58075, highly similar to Ceruloplasmin (EC 1.16.3.1) OS=Homo sapiens PE=2 SV=1 - [B7Z5Q2_HUMAN]	1181.2	35.1	10	27	27	169	0.916781	0.922505	0.87197	0.858849	1.16705	1.11183	1.12546	1.12744	946	108.753	5.77002	0.788126	3.50968e-05
A2KBC4	Anti-TN-C scFv (Fragment) OS=Homo sapiens PE=2 SV=1 - [A2KBC4_HUMAN]	1157.86	60.08	31	2	10	81	0.96811	0.791277	1.02769	1.09074	0.69962	0.854152	1.10244	1.19374	238	25.1483	8.41162	1.00727	0.959339
Q59HB3	Apolipoprotein B variant (Fragment) OS=Homo sapiens PE=2 SV=1 - [Q59HB3_HUMAN]	1144.49	37.34	12	1	56	150	1.09436	0.745532	1.25541	1.17608	1.04863	1.06793	0.916561	0.900958	1615	183.465	6.80029	1.08539	0.524578
P00739	Haptoglobin-related protein OS=Homo sapiens GN=HPR PE=2 SV=2 - [HPTR_HUMAN]	1114.95	50.57	4	5	17	202	0.93067	0.994417	1.02029	0.915071	0.933724	1.28423	1.12927	1.14044	348	39.0047	7.09326	0.860263	0.113747
P01011	Alpha-1-antichymotrypsin OS=Homo sapiens GN=SERPINA3 PE=1 SV=2 - [AACT_HUMAN]	1111.19	31.68	5	13	13	102	1.01966	0.970852	0.784146	0.760293	1.26977	1.32889	0.947326	1.00376	423	47.6205	5.51611	0.776923	0.0758911
B4E1Z4	Uncharacterized protein OS=Homo sapiens PE=1 SV=1 - [B4E1Z4_HUMAN]	1046.66	30.88	24	24	41	137	0.850719	0.933716	0.78831	0.758512	1.25495	1.31515	1.08146	1.08095	1266	140.853	7.18115	0.704142	0.00421796
A0A024R962	HCG40889, isoform CRA_b OS=Homo sapiens GN=hCG_40889 PE=4 SV=1 - [A0A024R962_HUMAN]	1020.89	40.62	13	40	44	147	0.978106	0.925065	0.905869	0.928741	1.11652	1.11915	1.03169	1.0921	1231	138.979	6.62451	0.857339	0.00113868
Q7Z7Q0	APOB protein OS=Homo sapiens GN=APOB PE=2 SV=1 - [Q7Z7Q0_HUMAN]	991.776	47.76	6	1	39	131	1.54388	1.46346	0.851017	0.684399	0.604608	1.49555	0.759816	0.768183	825	92.2752	7.41553	1.25158	0.467348
P01619	Ig kappa chain V-III region B6 OS=Homo sapiens PE=1 SV=1 - [KV301_HUMAN]	970.06	37.96	2	2	4	57	1.12945	0.922639	0.950123	1.10943	0.9211	1.00963	1.13612	1.00307	108	11.6278	9.24658	1.01007	0.887276
P68871	Hemoglobin subunit beta OS=Homo sapiens GN=HBB PE=1 SV=2 - [HBB_HUMAN]	965.04	87.07	73	6	10	63	0.569202	1.41862	1.19248	1.19449	0.469874	0.64269	1.41676	1.31264	147	15.9883	7.28369	1.13817	0.673885
P02679	Fibrinogen gamma chain OS=Homo sapiens GN=FGG PE=1 SV=3 - [FIBG_HUMAN]	934.932	49.45	4	3	23	213	0.757565	0.835174	0.928135	0.991819	1.33587	1.03996	1.03862	1.06399	453	51.4789	5.61768	0.784327	0.0383738
P01625	Ig kappa chain V-IV region Len OS=Homo sapiens PE=1 SV=2 - [KV402_HUMAN]	923.294	52.63	1	2	5	77	0.924811	0.810837	1.49768	1.49036	0.875531	0.881136	0.897695	0.79522	114	12.6322	7.92822	1.36928	0.178457
D3DP16	Fibrinogen gamma chain, isoform CRA_a OS=Homo sapiens GN=FGG PE=4 SV=1 - [D3DP16_HUMAN]	914.837	53.59	4	1	21	215	0.821909	0.737783	0.900181	0.794759	1.61085	0.945829	1.04278	1.22694	334	37.7142	6.29053	0.674332	0.0719757
P04206	Ig kappa chain V-III region GOL OS=Homo sapiens PE=1 SV=1 - [KV307_HUMAN]	902.031	61.47	3	2	5	51	0.877432	0.74989	1.2188	1.05559	1.06122	0.666921	1.17352	1.26307	109	11.823	9.24658	0.936855	0.707728
P19652	Alpha-1-acid glycoprotein 2 OS=Homo sapiens GN=ORM2 PE=1 SV=2 - [A1AG2_HUMAN]	900.253	38.31	1	4	8	82	0.740599	0.913434	0.975566	0.923959	1.08596	1.29523	1.05869	1.09626	201	23.5876	5.10986	0.78351	0.0165739
P02042	Hemoglobin subunit delta OS=Homo sapiens GN=HBD PE=1 SV=2 - [HBD_HUMAN]	859.186	37.41	27	1	5	36	0.726286	1.31107	1.06045	1.26064	0.604426	0.685602	1.32234	1.17453	147	16.0453	8.04541	1.15078	0.545308
G3GAU4	Anti-H1N1 influenza HA kappa chain variable region (Fragment) OS=Homo sapiens PE=2 SV=1 - [G3GAU4_HUMAN]	856.782	31.78	1	1	3	53	1.86984	0.747788	1.06689	0.897489	1.20454	0.591303	0.992436	1.00797	107	11.5987	7.95752	1.20706	0.519431
P02675	Fibrinogen beta chain OS=Homo sapiens GN=FGB PE=1 SV=2 - [FIBB_HUMAN]	855.828	58.86	4	25	25	212	0.790424	0.865847	0.877472	0.867395	1.40938	1.05435	1.12201	1.10622	491	55.8923	8.26514	0.724792	0.0239292
A0A024R462	Fibronectin 1, isoform CRA_n OS=Homo sapiens GN=FN1 PE=4 SV=1 - [A0A024R462_HUMAN]	818.62	26.07	28	49	49	119	0.820877	0.962784	0.889813	0.88111	1.19126	1.10842	1.11227	1.14982	2355	259.049	5.73193	0.779434	0.000671953
P00734	Prothrombin OS=Homo sapiens GN=F2 PE=1 SV=2 - [THRB_HUMAN]	797.763	51.29	8	27	27	76	0.913139	0.944712	0.913993	0.909318	1.02026	1.22441	1.08074	1.06934	622	69.9921	5.89697	0.837733	0.0247194
B2RMS9	Inter-alpha (Globulin) inhibitor H4 (Plasma Kallikrein-sensitive glycoprotein) OS=Homo sapiens GN=ITIH4 PE=2 SV=1 - [B2RMS9_HUMAN]	763.076	28.06	9	23	23	89	0.816549	0.854565	0.866056	0.829213	1.38316	1.25982	1.04481	1.09077	930	103.298	6.97607	0.704541	0.0189577
P04220	Ig mu heavy chain disease protein OS=Homo sapiens PE=1 SV=1 - [MUCB_HUMAN]	757.966	39.39	1	1	13	178	0.859048	1.53992	0.990911	1.26846	0.762163	1.07367	0.833226	0.770413	391	43.0303	5.23682	1.35446	0.138731
Q6PIK1	IGL@ protein OS=Homo sapiens GN=IGL@ PE=1 SV=1 - [Q6PIK1_HUMAN]	739.854	41.7	15	1	9	266	1.14906	1.18064	0.91573	0.829431	1.01596	1.17837	0.939799	0.91358	235	24.8421	7.7085	1.00667	0.951075
P01776	Ig heavy chain V-III region WAS OS=Homo sapiens PE=1 SV=1 - [HV315_HUMAN]	733.523	23.93	2	1	2	25	1.05183	1.11455	0.95819	1.08439	1.02327	1.09691	0.81108	1.00316	117	13.0824	7.98682	1.0699	0.372404
P05155	Plasma protease C1 inhibitor OS=Homo sapiens GN=SERPING1 PE=1 SV=2 - [IC1_HUMAN]	722.979	30	5	15	15	91	0.923321	0.918248	0.863576	0.868439	1.27479	1.20188	1.03989	1.05277	500	55.1194	6.55127	0.781838	0.0188298
P01779	Ig heavy chain V-III region TUR OS=Homo sapiens PE=1 SV=1 - [HV318_HUMAN]	721.827	26.72	3	0	2	27									116	12.4233	9.72998	NA	NA
P06396	Gelsolin OS=Homo sapiens GN=GSN PE=1 SV=1 - [GELS_HUMAN]	715.026	31.46	15	22	24	77	0.727464	1.01493	0.938027	0.93391	0.806644	1.47749	1.10168	1.06665	782	85.6442	6.27783	0.811588	0.234967
B4DPP8	cDNA FLJ53075, highly similar to Kininogen-1 OS=Homo sapiens PE=2 SV=1 - [B4DPP8_HUMAN]	658.524	49.64	3	2	23	100	0.746278	0.855787	0.824085	0.9441	0.909442	1.4111	1.13085	1.00712	415	46.4668	6.43018	0.755944	0.0821862
B4E1C2	Kininogen 1, isoform CRA_b OS=Homo sapiens GN=KNG1 PE=2 SV=1 - [B4E1C2_HUMAN]	635.928	34.32	2	3	24	101	0.940356	0.775529	0.910665	0.850666	1.05247	1.36388	1.13084	1.11377	644	71.8701	6.81494	0.746192	0.0146859
A2JA19	Anti-mucin1 light chain variable region (Fragment) OS=Homo sapiens PE=2 SV=1 - [A2JA19_HUMAN]	626.403	38.32	2	1	3	52	1.1474	0.996164	0.958944	1.19977	1.02653	0.973987	1.16749	0.946564	107	11.6508	8.90967	1.04544	0.561651
A8K2T4	cDNA FLJ78207, highly similar to Human complement protein component C7 mRNA OS=Homo sapiens PE=2 SV=1 - [A8K2T4_HUMAN]	597.797	36.89	9	26	26	98	0.960641	1.11995	0.948205	0.914534	0.93197	1.1622	1.01239	1.02464	843	93.3462	6.50732	0.954733	0.505911
Q5CZ94	Putative uncharacterized protein DKFZp781M0386 OS=Homo sapiens GN=DKFZp781M0386 PE=2 SV=1 - [Q5CZ94_HUMAN]	570.039	35.47	5	1	7	236	1.09146	0.833393	1.15984	1.13982	1.01867	0.89465	0.992659	0.979171	234	24.9863	7.26904	1.08698	0.356042
P01008	Antithrombin-III OS=Homo sapiens GN=SERPINC1 PE=1 SV=1 - [ANT3_HUMAN]	560.59	35.56	9	16	16	69	0.720545	0.992502	0.899788	0.838601	1.08169	1.30065	1.12047	1.15221	464	52.5689	6.7124	0.741783	0.00727344
Q9UL90	Myosin-reactive immunoglobulin heavy chain variable region (Fragment) OS=Homo sapiens PE=2 SV=1 - [Q9UL90_HUMAN]	534.691	42.48	12	1	4	69	1.05293	0.962847	0.965829	0.999547	1.06821	0.99762	1.14567	0.98508	113	12.4291	8.44092	0.948773	0.26505
Q6DHW4	Uncharacterized protein OS=Homo sapiens PE=2 SV=1 - [Q6DHW4_HUMAN]	525.859	36.71	5	1	7	231	0.869107	0.52452	0.804366	0.850356	0.520821	2.61324	1.19764	0.736672	237	25.0924	7.98682	0.601302	0.363408
P04217	Alpha-1B-glycoprotein OS=Homo sapiens GN=A1BG PE=1 SV=4 - [A1BG_HUMAN]	521.181	34.14	5	13	13	70	0.907637	0.953378	0.900914	0.855309	1.19112	1.13538	1.06158	1.06044	495	54.2195	5.85889	0.813174	0.00247612
P01597	Ig kappa chain V-I region DEE OS=Homo sapiens PE=1 SV=1 - [KV105_HUMAN]	516.059	26.85	4	2	3	38	0.787302	0.974727	1.13042	1.02438	1.11884	1.05929	1.00333	1.08744	108	11.6538	9.36377	0.917526	0.315169
P01608	Ig kappa chain V-I region Roy OS=Homo sapiens PE=1 SV=1 - [KV116_HUMAN]	505.964	24.07	4	1	2	43	1.00453	0.923007	1.06487	0.992347	1.23085	0.998106	0.907608	0.893428	108	11.7748	5.36377	0.988834	0.899367
P00747	Plasminogen OS=Homo sapiens GN=PLG PE=1 SV=2 - [PLMN_HUMAN]	503.505	30	15	23	23	53	0.695958	0.859383	0.89506	0.87049	1.1826	1.46544	1.06623	1.0503	810	90.5102	7.23975	0.696893	0.0246124
A2MYE1	A30 (Fragment) OS=Homo sapiens PE=4 SV=1 - [A2MYE1_HUMAN]	492.645	46.88	6	2	3	36	0.610657	1.16691	1.55115	1.59354	0.835292	0.968866	0.68729	0.69118	96	10.3861	8.49951	1.54714	0.150528
B4E1I8	cDNA FLJ54228, highly similar to Leucine-rich alpha-2-glycoprotein OS=Homo sapiens PE=2 SV=1 - [B4E1I8_HUMAN]	475.548	30.61	3	10	10	39	0.628347	1.03532	0.844822	0.846628	1.25963	1.46893	0.968599	0.999437	330	36.4712	7.21045	0.714286	0.0639651
O43866	CD5 antigen-like OS=Homo sapiens GN=CD5L PE=1 SV=1 - [CD5L_HUMAN]	473.514	50.43	10	17	17	44	0.803262	1.39753	1.12949	1.10132	0.755484	1.28551	0.819979	0.818463	347	38.0629	5.46533	1.2044	0.318921
A0N5G3	Rheumatoid factor G9 light chain (Fragment) OS=Homo sapiens GN=V<lambda>3 PE=2 SV=1 - [A0N5G3_HUMAN]	467.556	33.06	1	2	3	70	1.29429	1.13464	1.01299	1.02034	0.734948	0.844644	1.1313	0.911244	121	12.8893	6.52197	1.23192	0.0981291
P01594	Ig kappa chain V-I region AU OS=Homo sapiens PE=1 SV=1 - [KV102_HUMAN]	467.166	31.48	4	1	2	33	0.686719	1.14764	1.09073	1.14912	1.01596	0.760943	1.12571	1.10356	108	11.9318	5.32568	1.01697	0.907182
B7Z1F8	cDNA FLJ53025, highly similar to Complement C4-B OS=Homo sapiens PE=2 SV=1 - [B7Z1F8_HUMAN]	461.723	47.41	2	1	13	71	1.14252	0.905908	1.20829	1.22081	0.713562	0.791173	1.0764	1.19139	270	30.4248	7.98682	1.18717	0.246938
Q96JD0	Amyloid lambda 6 light chain variable region SAR (Fragment) OS=Homo sapiens PE=2 SV=1 - [Q96JD0_HUMAN]	459.59	20.69	1	1	2	69	1.37517	1.0164	1.02149	1.0937	1.02519	1.04889	0.957214	0.699733	116	12.2869	5.0083	1.20772	0.147587
D6RF35	Vitamin D-binding protein OS=Homo sapiens GN=GC PE=1 SV=1 - [D6RF35_HUMAN]	455.641	52.94	11	25	25	94	0.940106	0.872433	1.07198	1.0727	1.38846	0.800893	1.0012	1.01632	476	52.9859	5.51611	0.940799	0.662482
A2IPI4	HRV Fab 025-VL (Fragment) OS=Homo sapiens PE=2 SV=1 - [A2IPI4_HUMAN]	452.49	41.59	6	3	4	34	0.895179	1.03539	1.20885	0.993948	1.21693	0.94082	1.09737	0.99951	113	12.1471	9.20264	0.971328	0.743867
P01610	Ig kappa chain V-I region WEA OS=Homo sapiens PE=1 SV=1 - [KV118_HUMAN]	446.905	30.56	4	1	2	32	1.46251	0.878136	1.01243	0.954675	0.893245	1.04466	0.991836	1.02938	108	11.8328	8.90967	1.08815	0.561571
P01606	Ig kappa chain V-I region OU OS=Homo sapiens PE=1 SV=1 - [KV114_HUMAN]	446.425	16.67	4	1	2	33	0.991674	0.846705	0.835457	0.955711	0.933781	1.47107	0.984442	0.999886	108	11.7697	9.90576	0.827068	0.230026
P01609	Ig kappa chain V-I region Scw OS=Homo sapiens PE=1 SV=1 - [KV117_HUMAN]	446.425	42.59	4	2	3	34	1.06965	0.883075	1.18732	0.986563	0.916906	0.913685	0.983319	1.17317	108	11.7568	5.99854	1.03511	0.706455
A2NI60	BRE (Fragment) OS=Homo sapiens PE=1 SV=1 - [A2NI60_HUMAN]	446.425	34.26	4	1	2	32		1.3675	2.1925		1.27779	1.40549	2.0328		108	11.9308	4.56396	1.13232	0.710926
Q9UL70	Myosin-reactive immunoglobulin light chain variable region (Fragment) OS=Homo sapiens PE=2 SV=1 - [Q9UL70_HUMAN]	446.425	31.48	4	1	2	32	0.961187	0.988705	0.891105	0.951803	1.16018	1.06897	1.06787	1.08121	108	11.6258	9.36377	0.866377	0.00290315
B4E1B3	cDNA FLJ53950, highly similar to Angiotensinogen OS=Homo sapiens PE=2 SV=1 - [B4E1B3_HUMAN]	437.863	24.25	11	10	10	30	0.917313	0.843876	0.922695	0.911509	0.83565	1.33359	1.25541	1.20881	466	51.0304	6.16357	0.776003	0.0989025
P05090	Apolipoprotein D OS=Homo sapiens GN=APOD PE=1 SV=1 - [APOD_HUMAN]	436.536	33.33	5	7	7	38	0.853395	1.10041	1.03978	1.04095	0.885355	1.09524	1.02307	1.01943	189	21.2618	5.14795	1.00298	0.966927
A2JA16	Anti-mucin1 light chain variable region (Fragment) OS=Homo sapiens PE=2 SV=1 - [A2JA16_HUMAN]	430.116	31.78	1	1	2	31	1.16604	1.13186	0.817777	1.09422	1.05014	0.686555	1.21695	0.940307	107	11.6138	8.45557	1.08115	0.586474
P01714	Ig lambda chain V-III region SH OS=Homo sapiens PE=1 SV=1 - [LV301_HUMAN]	420.672	42.59	6	3	4	17	0.7687	1.31344	1.07119	1.12446	1.11063	0.913107	0.970528	0.813496	108	11.3856	6.52197	1.12316	0.40713
B2R950	cDNA, FLJ94213, highly similar to Homo sapiens pregnancy-zone protein (PZP), mRNA OS=Homo sapiens PE=2 SV=1 - [B2R950_HUMAN]	408.481	7.22	6	3	11	57	1.07696	1.20475	0.965943	1.5678	1.07386	0.719406	0.868371	0.837808	1482	163.768	6.37939	1.37639	0.0828926
A2NB45	Cold agglutinin FS-1 L-chain (Fragment) OS=Homo sapiens PE=2 SV=1 - [A2NB45_HUMAN]	405.787	46.9	12	2	4	26	1.11177	0.799697	0.962306	0.957148	1.21017	1.00145	1.08409	0.987203	113	12.3802	8.48486	0.894675	0.219069
B1N7B8	Cryocrystalglobulin CC1 kappa light chain variable region (Fragment) OS=Homo sapiens PE=2 SV=1 - [B1N7B8_HUMAN]	400.637	34.58	1	2	3	23	1.1352	1.0516	0.98173	1.09347	1.01922	0.994017	1.12885	0.969306	107	11.7889	7.98682	1.03673	0.461791
A0N5G1	Rheumatoid factor C6 light chain (Fragment) OS=Homo sapiens GN=V<kappa>1 PE=2 SV=1 - [A0N5G1_HUMAN]	394.774	31.9	4	3	3	29	1.06312	0.948793	1.05121	1.01968	1.19699	0.984108	1.00228	0.969291	116	12.5202	8.45557	0.983382	0.784376
A0A068LN13	Ig heavy chain variable region (Fragment) OS=Homo sapiens PE=2 SV=1 - [A0A068LN13_HUMAN]	393.758	44.07	5	2	5	42	1.39642	0.972204	1.04583	1.12602	0.772668	0.769932	1.01147	1.1641	118	13.2764	7.12256	1.22109	0.175068
P02760	Protein AMBP OS=Homo sapiens GN=AMBP PE=1 SV=1 - [AMBP_HUMAN]	393.537	37.22	5	11	11	42	0.77787	0.862469	1.0227	1.05015	1.24163	1.02986	1.07588	1.0585	352	38.974	6.25244	0.842523	0.0791218
Q9UL83	Myosin-reactive immunoglobulin light chain variable region (Fragment) OS=Homo sapiens PE=2 SV=1 - [Q9UL83_HUMAN]	383.319	42.59	1	1	3	25	1.13849	1.03075	1.07266	1.0202	0.949604	0.938787	0.97857	0.903818	108	11.8268	8.67529	1.1299	0.0115391
A0A087X0P6	Protein IGKV2D-29 OS=Homo sapiens GN=IGKV2D-29 PE=1 SV=1 - [A0A087X0P6_HUMAN]	377.108	43.14	9	1	3	21	1.24712	0.883542	0.687329	1.39626	1.18678	0.96385	0.986514	1.16243	102	11.1846	5.93506	0.98	0.907325
Q5T985	Inter-alpha-trypsin inhibitor heavy chain H2 OS=Homo sapiens GN=ITIH2 PE=1 SV=1 - [Q5T985_HUMAN]	373.764	27.06	7	23	23	59	0.989876	0.741905	0.840788	0.869467	1.22428	1.12709	1.16631	1.16698	935	105.15	7.03467	0.734842	0.00517557
Q86Z09	FGA protein (Fragment) OS=Homo sapiens GN=FGA PE=4 SV=1 - [Q86Z09_HUMAN]	365.195	68.85	1	1	4	42	0.866734	0.789398	0.847003	0.803354	1.23736	1.30106	1.04977	1.26218	61	7.03843	8.49951	0.681649	0.00382562
B7Z539	cDNA FLJ56954, highly similar to Inter-alpha-trypsin inhibitor heavy chain H1 OS=Homo sapiens PE=2 SV=1 - [B7Z539_HUMAN]	361.23	20.16	7	11	11	41	1.00805	0.785395	0.869728	0.832433	1.18872	1.1706	1.14305	1.13855	645	72.074	7.6792	0.752908	0.00737418
P55058	Phospholipid transfer protein OS=Homo sapiens GN=PLTP PE=1 SV=1 - [PLTP_HUMAN]	356.458	17.04	3	7	7	21	1.06877	1.31538	0.944339	0.891608	0.806066	1.26495	0.965391	0.926136	493	54.7045	7.00537	1.06512	0.651329
A0A087X0Q4	Protein IGKV2-40 OS=Homo sapiens GN=IGKV2-40 PE=1 SV=1 - [A0A087X0Q4_HUMAN]	350.379	56.73	13	2	4	19	1.0101	1.48535	1.00324	1.12022	0.933585	0.87818	0.92866	0.902319	104	11.4265	4.48779	1.26764	0.120012
A2MYD4	V2-7 protein (Fragment) OS=Homo sapiens GN=V2-7 PE=4 SV=1 - [A2MYD4_HUMAN]	346.446	61.46	8	1	5	32	1.20437	0.97914	0.98297	0.947091	0.933525	1.01739	1.02975	0.964022	96	10.3459	5.0083	1.04259	0.544462
P01767	Ig heavy chain V-III region BUT OS=Homo sapiens PE=1 SV=1 - [HV306_HUMAN]	345.506	45.22	4	4	5	70	1.15796	0.98581	1.06147	1.02057	0.854303	1.04131	1.00107	1.03501	115	12.3712	9.24658	1.07504	0.247681
P06314	Ig kappa chain V-IV region B17 OS=Homo sapiens PE=2 SV=1 - [KV404_HUMAN]	342.299	31.34	1	1	4	62	0.89611	0.946506	1.04796	0.923848	0.762046	0.966054	1.4038	1.256	134	14.9565	6.58057	0.869417	0.397638
A2NKM7	NANUC-2 heavy chain (Fragment) OS=Homo sapiens PE=2 SV=1 - [A2NKM7_HUMAN]	339.33	30.83	1	2	4	39	1.38187	1.05208	0.910895	0.936385	0.939485	1.03621	0.940873	0.94492	133	14.5953	9.64209	1.10878	0.408076
P01616	Ig kappa chain V-II region MIL OS=Homo sapiens PE=1 SV=1 - [KV203_HUMAN]	336.002	33.04	6	2	3	20	1.41118	0.812254	1.00534	1.01186	0.911009	1.0062	1.27952	0.985202	112	12.0481	9.29053	1.01387	0.92644
P02647	Apolipoprotein A-I OS=Homo sapiens GN=APOA1 PE=1 SV=1 - [APOA1_HUMAN]	333.21	55.06	8	16	16	53	0.902944	0.96746	1.35885	1.3825	0.748984	0.832182	1.04	0.997982	267	30.7589	5.75732	1.27411	0.150157
A2J1N3	Rheumatoid factor RF-IP20 (Fragment) OS=Homo sapiens PE=2 SV=1 - [A2J1N3_HUMAN]	332.343	45.83	12	1	4	56	1.70892	2.18948	1.16479	0.942186	0.806149	0.309128	0.384197	0.706094	96	10.5002	9.12939	2.72336	0.0348128
P04004	Vitronectin OS=Homo sapiens GN=VTN PE=1 SV=1 - [VTNC_HUMAN]	327.285	21.76	4	11	11	48	0.948969	0.748207	0.887549	0.901287	1.12737	1.34294	1.07507	1.08116	478	54.2712	5.79541	0.753567	0.0123271
Q9UL84	Myosin-reactive immunoglobulin heavy chain variable region (Fragment) OS=Homo sapiens PE=2 SV=1 - [Q9UL84_HUMAN]	321.94	33.61	2	2	4	38	1.22284	1.1985	1.05974	1.05741	1.12819	0.772782	0.893904	0.93341	122	13.5706	8.45557	1.21754	0.0657338
P01031	Complement C5 OS=Homo sapiens GN=C5 PE=1 SV=4 - [CO5_HUMAN]	319.519	22.55	2	39	39	97	0.965775	0.88182	0.929036	0.923125	1.1865	1.04893	1.10013	1.08564	1676	188.186	6.52197	0.836725	0.00341626
Q9NP29	Microfibrillar protein 2 (Fragment) OS=Homo sapiens PE=2 SV=1 - [Q9NP29_HUMAN]	315.11	18.46	1	1	2	43	1.06468	1.12701	1.32727	1.32964	0.76024	0.943803	0.853275	0.816345	130	14.1192	9.64209	1.43759	0.00609471
A2NZ55	Variable immnoglobulin anti-estradiol heavy chain (Fragment) OS=Homo sapiens PE=2 SV=1 - [A2NZ55_HUMAN]	312.775	22.14	4	1	3	38	1.18935	1.32899	1.03428	1.00934	0.991936	0.679785	0.907268	1.0595	131	13.9127	8.79248	1.25371	0.0837691
P06681	Complement C2 OS=Homo sapiens GN=C2 PE=1 SV=2 - [CO2_HUMAN]	310.251	25.4	22	2	19	35	1.11406	0.899705	0.823763	0.907156	1.18447	1.16269	0.979255	1.05541	752	83.2143	7.41553	0.854828	0.0922977
P02765	Alpha-2-HS-glycoprotein OS=Homo sapiens GN=AHSG PE=1 SV=1 - [FETUA_HUMAN]	309.958	33.24	4	10	10	46	0.815764	1.02234	0.890952	0.881981	0.782635	1.37032	1.17551	1.15872	367	39.2997	5.71924	0.80459	0.172305
P10909	Clusterin OS=Homo sapiens GN=CLU PE=1 SV=1 - [CLUS_HUMAN]	299.914	27.39	14	13	13	40	0.879969	0.929238	0.919083	0.964809	1.09735	1.30593	0.988259	0.993731	449	52.461	6.26514	0.842189	0.0993253
P01613	Ig kappa chain V-I region Ni OS=Homo sapiens PE=1 SV=1 - [KV121_HUMAN]	298.206	30.36	2	2	2	16	1.04639	0.977836	1.05546	1.15611	1.11487	0.707684	0.91896	0.904735	112	12.238	5.36377	1.16123	0.178844
A8K5J8	cDNA FLJ75066, highly similar to Homo sapiens complement component 1, r subcomponent (C1R), mRNA OS=Homo sapiens PE=2 SV=1 - [A8K5J8_HUMAN]	294.767	25.96	11	16	17	52	0.91662	1.04834	0.882892	0.914368	1.00453	1.31752	1.02157	1.00433	705	80.147	6.44287	0.865026	0.155589
P25311	Zinc-alpha-2-glycoprotein OS=Homo sapiens GN=AZGP1 PE=1 SV=2 - [ZA2G_HUMAN]	274.735	50.67	4	17	17	62	0.739215	0.935632	1.11366	1.05841	0.952247	1.25111	1.02562	0.991147	298	34.2371	6.04932	0.911611	0.417284
P01611	Ig kappa chain V-I region Wes OS=Homo sapiens PE=1 SV=1 - [KV119_HUMAN]	274.44	45.37	1	3	3	11	1.03828	0.872619	1.06879	1.03968	1.13675	0.913386	1.03158	0.912889	108	11.6007	7.28369	1.00626	0.931837
A2IPH7	HRV Fab 025-VH (Fragment) OS=Homo sapiens PE=2 SV=1 - [A2IPH7_HUMAN]	271.548	22.31	1	1	2	33	1.54858	1.14527	1.00213	0.900214	0.709997	0.920707	1.00567	0.976464	121	12.9033	9.5542	1.27207	0.18911
Q0ZCI8	Immunglobulin heavy chain variable region (Fragment) OS=Homo sapiens PE=4 SV=1 - [Q0ZCI8_HUMAN]	267.189	45.97	26	2	5	74	0.801671	1.3717	1.05738	1.00688	0.89029	1.07145	0.91198	0.919877	124	13.6996	6.60986	1.11732	0.42692
Q2L9S7	Alpha-1-antitrypsin MBrescia variant (Fragment) OS=Homo sapiens GN=AAT PE=4 SV=1 - [Q2L9S7_HUMAN]	260.565	71.91	1	1	7	85	1.19333	1.10076	0.971171	1.00671	0.902836	0.958402	1.0107	1.05962	89	10.7145	6.16357	1.08647	0.214523
P51884	Lumican OS=Homo sapiens GN=LUM PE=1 SV=2 - [LUM_HUMAN]	258.313	31.36	2	11	11	45	0.818577	1.02167	1.02925	1.03966	1.06276	1.02004	1.05429	1.04329	338	38.4048	6.60986	0.935407	0.293582
Q9HCC1	Single chain Fv (Fragment) OS=Homo sapiens PE=1 SV=1 - [Q9HCC1_HUMAN]	252.817	36.61	16	1	3	53	1.3101	0.956368	1.01683	1.15678	1.0176	1.01993	0.851595	0.923434	112	12.235	8.47021	1.16444	0.14404
P63241	Eukaryotic translation initiation factor 5A-1 OS=Homo sapiens GN=EIF5A PE=1 SV=2 - [IF5A1_HUMAN]	225.925	30.52	4	2	2	6									154	16.8214	5.23682	NA	NA
A0A0C4DH38	Protein IGHV5-51 (Fragment) OS=Homo sapiens GN=IGHV5-51 PE=1 SV=1 - [A0A0C4DH38_HUMAN]	224.345	40.17	5	1	4	21	1.31582	1.0664	0.961656	0.800888	0.931056	1.29231	1.10872	0.986287	117	12.6663	8.26514	0.959935	0.759449
E5RFE7	Carbonic anhydrase 1 (Fragment) OS=Homo sapiens GN=CA1 PE=1 SV=1 - [E5RFE7_HUMAN]	223.794	36.6	13	4	7	21	0.418761	1.12867	1.23618	1.21456	0.33279	0.800579	1.47809	1.66355	194	21.3887	7.66455	0.93522	0.856534
P43652	Afamin OS=Homo sapiens GN=AFM PE=1 SV=1 - [AFAM_HUMAN]	222.058	35.56	1	23	23	39	1.62727	1.14744	1.04232	0.941469	0.751245	0.716472	1.00349	1.03984	599	69.024	5.89697	1.35527	0.136285
P06331	Ig heavy chain V-II region ARH-77 OS=Homo sapiens PE=4 SV=1 - [HV209_HUMAN]	220.542	17.12	3	1	2	23	1.13353	0.974252	1.07362	1.12588	1.06032	0.977873	0.922648	0.97708	146	16.2181	8.27979	1.09396	0.0965172
P01781	Ig heavy chain V-III region GAL OS=Homo sapiens PE=1 SV=1 - [HV320_HUMAN]	214.797	40.52	5	2	4	25	1.17032	1.01387	0.972987	0.975725	1.0261	0.93583	1.0308	0.988377	116	12.7222	8.48486	1.03818	0.498681
Q7Z3Y6	Rearranged VH4-34 V gene segment (Fragment) OS=Homo sapiens GN=VH4-34 PE=4 SV=1 - [Q7Z3Y6_HUMAN]	213.931	44.83	4	1	4	25	0.873261	0.850736	1.40073	1.14207	1.0811	1.10086	0.860856	1.01965	116	12.8944	7.94287	1.05021	0.734915
P80748	Ig lambda chain V-III region LOI OS=Homo sapiens PE=1 SV=1 - [LV302_HUMAN]	206.713	45.95	2	2	4	28	1.0006	1.08279	1.07035	1.09372	0.920101	0.775193	1.06238	1.05091	111	11.9278	5.08447	1.11555	0.201584
A2NWW1	VH-3 family (VH26)D/J protein (Fragment) OS=Homo sapiens GN=VH-3 family (VH26)D/J PE=4 SV=1 - [A2NWW1_HUMAN]	203.85	38.94	4	1	3	12	1.30478	1.16852	1.13823	1.14578	0.779016	0.726871	0.897386	0.924688	113	12.273	6.59521	1.42969	0.00125652
P27169	Serum paraoxonase/arylesterase 1 OS=Homo sapiens GN=PON1 PE=1 SV=3 - [PON1_HUMAN]	201.1	21.41	9	7	7	28	0.833851	0.808275	1.04613	1.03593	0.941996	1.20826	1.11306	1.13799	355	39.7062	5.22412	0.846171	0.0947544
A2J1N5	Rheumatoid factor RF-ET6 (Fragment) OS=Homo sapiens PE=2 SV=1 - [A2J1N5_HUMAN]	200.034	31.91	8	2	4	72	1.17623	1.07406	0.944832	1.00557	0.883822	1.01186	0.915661	1.01296	94	10.4432	9.12939	1.0983	0.172755
Q71DI3	Histone H3.2 OS=Homo sapiens GN=HIST2H3A PE=1 SV=3 - [H32_HUMAN]	197.117	30.15	10	1	2	6									136	15.3785	11.2681	NA	NA
A0A087X232	Complement C1s subcomponent OS=Homo sapiens GN=C1S PE=1 SV=1 - [A0A087X232_HUMAN]	196.528	24.49	9	14	14	34	0.995531	0.961435	0.849487	0.89572	1.08207	1.34916	1.00267	0.973685	682	75.8565	5.19873	0.839837	0.128496
Q0ZCI6	Immunglobulin heavy chain variable region (Fragment) OS=Homo sapiens PE=4 SV=1 - [Q0ZCI6_HUMAN]	195.984	39.34	9	2	5	65	1.09216	1.10065	0.90136	0.977339	1.08396	0.865373	0.920603	1.17524	122	13.6246	8.42627	1.00643	0.942751
P08697	Alpha-2-antiplasmin OS=Homo sapiens GN=SERPINF2 PE=1 SV=3 - [A2AP_HUMAN]	192.098	11	6	6	6	20	0.811179	0.954712	0.865994	0.856743	1.15185	1.27669	1.07761	1.06282	491	54.5311	6.29053	0.763457	0.0053252
B4DPN0	cDNA FLJ51265, moderately similar to Beta-2-glycoprotein 1 (Beta-2-glycoprotein I) OS=Homo sapiens PE=2 SV=1 - [B4DPN0_HUMAN]	189.537	58.39	6	15	15	48	0.667196	0.990046	1.01685	0.954923	0.939044	1.28623	1.14849	1.1034	274	30.3188	7.85498	0.810769	0.0986508
B4E1D8	cDNA FLJ51597, highly similar to C4b-binding protein alpha chain OS=Homo sapiens PE=2 SV=1 - [B4E1D8_HUMAN]	188.478	37.87	5	18	18	45	0.82779	0.896795	1.01508	0.96436	1.37614	1.00241	0.975608	0.990933	536	60.3658	6.65381	0.852474	0.200914
P36955	Pigment epithelium-derived factor OS=Homo sapiens GN=SERPINF1 PE=1 SV=4 - [PEDF_HUMAN]	186.015	27.27	7	11	11	21	1.08373	1.08238	0.952877	1.07602	1.18192	0.90204	0.94085	0.922667	418	46.2833	6.37939	1.06256	0.440865
Q8TCF0	LBP protein OS=Homo sapiens GN=LBP PE=2 SV=1 - [Q8TCF0_HUMAN]	180.565	12.79	2	6	6	12	0.741995	1.14886	0.857628	0.872385	1.40283	1.19117	0.927371	0.976204	477	52.9007	6.75635	0.805203	0.169273
P02747	Complement C1q subcomponent subunit C OS=Homo sapiens GN=C1QC PE=1 SV=3 - [C1QC_HUMAN]	177.995	21.22	1	4	4	12	1.06682	1.0255	1.02774	0.933816	0.77136	1.17483	1.03793	1.01651	245	25.7571	8.41162	1.01325	0.889055
B4E335	cDNA FLJ52842, highly similar to Actin, cytoplasmic 1 OS=Homo sapiens PE=2 SV=1 - [B4E335_HUMAN]	177.815	36.47	95	6	10	30	0.830785	1.19406	0.975056	0.9251	1.02397	1.13567	0.939398	0.877811	351	39.2005	5.59229	0.986925	0.89618
Q5H9A7	Metalloproteinase inhibitor 1 OS=Homo sapiens GN=TIMP1 PE=1 SV=1 - [Q5H9A7_HUMAN]	176.674	40.56	7	5	5	11	0.935082	1.22922	0.883301	0.880174	0.786387	1.27387	1.03179	1.02379	143	16.0468	8.07471	0.954082	0.728926
P01591	Immunoglobulin J chain OS=Homo sapiens GN=JCHAIN PE=1 SV=4 - [IGJ_HUMAN]	176.238	41.51	4	6	6	34	1.41293	1.28288	1.01577	0.970484	1.04016	0.951186	0.751881	0.73706	159	18.087	5.23682	1.3454	0.0649626
P01768	Ig heavy chain V-III region CAM OS=Homo sapiens PE=1 SV=1 - [HV307_HUMAN]	176.159	23.77	20	2	5	65	1.37758	0.999237	1.11756	1.11237	0.930354	0.752514	0.984677	0.939046	122	13.6592	9.62744	1.27724	0.0458016
A0A0B4J1X5	Protein IGHV3-74 (Fragment) OS=Homo sapiens GN=IGHV3-74 PE=1 SV=1 - [A0A0B4J1X5_HUMAN]	175.946	37.61	11	1	4	50	0.342884	1.50503	1.42048	1.40387	1.18122	1.05195	0.629034	0.553006	117	12.8314	8.66064	1.36808	0.368683
P01624	Ig kappa chain V-III region POM OS=Homo sapiens PE=1 SV=1 - [KV306_HUMAN]	174.086	31.19	5	1	3	22	1.24805	0.895857	1.046	1.22986	0.799048	1.06306	0.855366	0.955461	109	11.9149	8.93896	1.2037	0.120988
A2J423	Anti-Mpl scFv (Fragment) OS=Homo sapiens PE=2 SV=1 - [A2J423_HUMAN]	172.921	12.55	9	1	3	45	1.22813	1.11861	0.940337	0.831861	0.934449	1.10364	1.00796	1.03518	239	25.2463	8.63135	1.00931	0.925574
Q65ZC9	Single-chain Fv (Fragment) OS=Homo sapiens GN=scFv PE=2 SV=1 - [Q65ZC9_HUMAN]	172.921	16.67	20	1	4	63	0.886203	1.23349	1.42322	1.09301	0.954094	0.796009	0.938384	0.895142	240	25.5535	9.11475	1.29361	0.0989723
A0A075B6R9	Protein IGKV2D-24 (Fragment) OS=Homo sapiens GN=IGKV2D-24 PE=4 SV=1 - [A0A075B6R9_HUMAN]	170.664	16.67	2	1	2	7	1.32631	1.04102	1.08243	1.05461	0.92852	0.987524	0.846865	0.962477	120	13.0707	8.86572	1.2088	0.0552374
Q9UL88	Myosin-reactive immunoglobulin heavy chain variable region (Fragment) OS=Homo sapiens PE=2 SV=1 - [Q9UL88_HUMAN]	168.947	38.93	2	2	4	31	0.92294	1.01953	0.994448	1.03406	0.999344	1.1368	1.02649	0.928528	131	14.1332	9.62744	0.970667	0.574188
A0A024R035	Complement component 9, isoform CRA_a OS=Homo sapiens GN=C9 PE=4 SV=1 - [A0A024R035_HUMAN]	166.118	30.77	3	18	18	39	0.754398	1.10084	0.984466	0.968003	0.744704	1.42471	1.02133	1.07089	559	63.1627	5.51611	0.893243	0.505229
P05543	Thyroxine-binding globulin OS=Homo sapiens GN=SERPINA7 PE=1 SV=2 - [THBG_HUMAN]	164.927	25.06	1	11	11	21	1.07323	1.02971	1.012	0.925257	1.15409	0.980453	1.02219	1.09093	415	46.2946	6.30322	0.95126	0.336388
P13671	Complement component C6 OS=Homo sapiens GN=C6 PE=1 SV=3 - [CO6_HUMAN]	157.994	19.91	3	19	19	29	0.946238	1.05811	0.913511	0.94862	1.01992	1.16357	1.0136	1.02862	934	104.718	6.75635	0.914833	0.108988
P06727	Apolipoprotein A-IV OS=Homo sapiens GN=APOA4 PE=1 SV=3 - [APOA4_HUMAN]	157.827	38.64	2	16	16	24	1.1271	1.14345	1.07229	1.11711	1.05696	0.769283	0.957605	0.919968	396	45.3715	5.37646	1.20383	0.0468765
A2J1M8	Rheumatoid factor RF-IP12 (Fragment) OS=Homo sapiens PE=2 SV=1 - [A2J1M8_HUMAN]	156.356	40	3	2	4	26	1.16858	1.1329	0.96248	1.02825	0.883805	0.901559	1.01022	1.01791	95	10.6781	7.98682	1.12533	0.0939837
D3DQX7	Serum amyloid A protein OS=Homo sapiens GN=SAA1 PE=3 SV=1 - [D3DQX7_HUMAN]	152.393	36.89	8	2	4	8	1.01745	0.863484	1.37976	1.27126	0.829127	1.05013	0.923072	0.838132	122	13.5535	6.78564	1.24478	0.156163
P68431	Histone H3.1 OS=Homo sapiens GN=HIST1H3A PE=1 SV=2 - [H31_HUMAN]	151.934	30.15	10	1	2	5									136	15.3945	11.1216	NA	NA
P04208	Ig lambda chain V-I region WAH OS=Homo sapiens PE=1 SV=1 - [LV106_HUMAN]	150.61	37.61	2	1	3	6	1.35987	0.962416	0.962373	1.01564	1.02746	1.12465	0.874978	0.851115	109	11.7177	6.53662	1.10882	0.401722
Q96SB0	Anti-streptococcal/anti-myosin immunoglobulin lambda light chain variable region (Fragment) OS=Homo sapiens PE=2 SV=1 - [Q96SB0_HUMAN]	150.61	37.96	2	1	3	6	1.21396	0.972128	0.895636	0.913616	0.989076	1.07692	0.831578	1.25733	108	11.5865	6.53662	0.961733	0.742108
P01763	Ig heavy chain V-III region WEA OS=Homo sapiens PE=1 SV=1 - [HV302_HUMAN]	147.277	19.3	4	1	2	40	0.934544	1.14204	0.819565	0.913891	0.951174	1.13027	1.03859	1.1176	114	12.2485	8.49951	0.899245	0.237478
B2R9F2	cDNA, FLJ94361, highly similar to Homo sapiens serine (or cysteine) proteinase inhibitor, clade A(alpha-1 antiproteinase, antitrypsin), member 6 (SERPINA6), mRNA OS=Homo sapiens PE=2 SV=1 - [B2R9F2_HUMAN]	147.128	20.49	4	7	7	18	0.757918	0.991428	0.797605	0.830793	1.06353	1.23441	1.13526	1.11721	405	45.0659	6.03662	0.742418	0.00443634
B2R888	Monocyte differentiation antigen CD14 OS=Homo sapiens PE=2 SV=1 - [B2R888_HUMAN]	147.1	26.13	4	8	8	12	0.947303	1.20399	0.909846	0.884177	1	1.18661	1.04888	1.06024	375	40.0227	6.22705	0.918296	0.346797
A0A0J9YXX1	Uncharacterized protein (Fragment) OS=Homo sapiens PE=1 SV=1 - [A0A0J9YXX1_HUMAN]	146.259	26.5	2	1	3	16	0.456555	0.635294	0.737848	0.636018	1.78535	1.36944	1.31066	1.21599	117	12.7643	8.27979	0.434079	0.00366051
Q8IZD8	Anti-thyroglobulin light chain variable region (Fragment) OS=Homo sapiens PE=2 SV=1 - [Q8IZD8_HUMAN]	144.127	21.78	3	1	2	12	1.02849	0.746906	1.50258	1.46897	1.03492	0.976714	0.716539	0.856548	101	10.3681	5.90967	1.32376	0.213634
A8KAJ3	cDNA FLJ77823, highly similar to Homo sapiens EGF-containing fibulin-like extracellular matrix protein 1, transcript variant 3, mRNA OS=Homo sapiens PE=2 SV=1 - [A8KAJ3_HUMAN]	143.817	19.68	12	8	8	24	0.901974	1.10377	0.952165	0.978223	1.01803	1.17603	1.04874	0.934893	493	54.6323	5.13525	0.942078	0.395075
A0A087WXI2	IgGFc-binding protein OS=Homo sapiens GN=FCGBP PE=1 SV=1 - [A0A087WXI2_HUMAN]	141.747	7.23	3	20	20	33	1.43861	0.9752	0.976871	0.928028	0.778951	0.993709	1.0826	1.10666	4204	444.918	5.35107	1.08983	0.55709
B2R8I2	cDNA, FLJ93914, highly similar to Homo sapiens histidine-rich glycoprotein (HRG), mRNA OS=Homo sapiens PE=2 SV=1 - [B2R8I2_HUMAN]	139.382	19.81	3	11	11	41	0.831146	0.978002	0.986064	0.965075	0.864859	1.38172	1.07768	1.05179	525	59.4748	7.44482	0.859036	0.249801
G3XAM2	Complement factor I OS=Homo sapiens GN=CFI PE=1 SV=1 - [G3XAM2_HUMAN]	138.202	25.87	11	4	15	28	0.779318	1.0128	0.92498	0.875964	1.28548	1.25944	1.04281	1.02603	576	65.0163	7.50342	0.778886	0.0266007
P01612	Ig kappa chain V-I region Mev OS=Homo sapiens PE=1 SV=1 - [KV120_HUMAN]	134.674	16.51	1	1	1	4	0.857673	1.00425	1.00405	1.22054	1.05485	0.869507	1.14421	1.02476	109	11.8628	6.56592	0.99829	0.985804
P07357	Complement component C8 alpha chain OS=Homo sapiens GN=C8A PE=1 SV=2 - [CO8A_HUMAN]	134.018	12.33	2	7	7	14	0.928221	0.996454	0.867922	0.895044	1.09711	1.27699	1.04261	1.03579	584	65.121	6.46826	0.827981	0.0337056
Q0ZCH0	Immunglobulin heavy chain variable region (Fragment) OS=Homo sapiens PE=4 SV=1 - [Q0ZCH0_HUMAN]	133.834	37.82	7	2	4	31	1.09157	0.85523	0.962818	1.10362	1.03959	0.920973	0.973856	1.00643	119	12.9834	8.80713	1.01852	0.789767
Q0ZCF6	Immunglobulin heavy chain variable region (Fragment) OS=Homo sapiens PE=4 SV=1 - [Q0ZCF6_HUMAN]	132.718	23.26	5	1	3	44	1.53998	0.852845	0.950387	0.970231	0.912238	0.800902	1.0615	1.18847	129	14.5382	8.77783	1.08832	0.644628
B7Z550	Complement component 8, beta polypeptide, isoform CRA_b OS=Homo sapiens GN=C8B PE=2 SV=1 - [B7Z550_HUMAN]	132.396	26.84	8	12	12	19	0.794847	1.05215	0.931669	0.871093	1.18437	1.25896	1.04638	1.04996	529	60.101	7.76709	0.804142	0.0257817
P05546	Heparin cofactor 2 OS=Homo sapiens GN=SERPIND1 PE=1 SV=3 - [HEP2_HUMAN]	130.423	26.65	2	13	13	33	0.825696	0.902903	1.02202	0.958983	0.768494	1.30004	1.11716	1.17933	499	57.0342	6.90283	0.850137	0.253481
P01034	Cystatin-C OS=Homo sapiens GN=CST3 PE=1 SV=1 - [CYTC_HUMAN]	129.662	34.25	3	4	4	10	0.763792	1.16933	1.09681	0.985569	1.00583	1.02846	1.06731	1.01603	146	15.7891	8.74854	0.975468	0.795258
A0A087X1J7	Glutathione peroxidase OS=Homo sapiens GN=GPX3 PE=1 SV=1 - [A0A087X1J7_HUMAN]	129	24.89	5	5	5	13	1.11057	0.862283	0.883031	0.993059	1.02214	1.14569	1.04665	1.05165	225	25.386	8.1333	0.902039	0.170041
A0A075B7B8	Protein IGHV3OR16-12 (Fragment) OS=Homo sapiens GN=IGHV3OR16-12 PE=1 SV=1 - [A0A075B7B8_HUMAN]	128.193	26.5	2	1	3	19	1.29581	1.1426	0.858471	0.999848	0.732448	0.946302	1.02319	1.19439	117	12.8663	6.50732	1.10321	0.482456
P02656	Apolipoprotein C-III OS=Homo sapiens GN=APOC3 PE=1 SV=1 - [APOC3_HUMAN]	126.35	34.34	2	3	3	6	0.892977	0.887246	1.35857	1.48166	1.64991	0.557192	0.74171	0.737228	99	10.8455	5.41455	1.25366	0.458477
E9M4D4	Hemoglobin alpha-1 globin chain (Fragment) OS=Homo sapiens GN=HBA1 PE=3 SV=1 - [E9M4D4_HUMAN]	125.631	38	23	4	4	16	0.520045	1.4167	1.29577	1.14291	0.423296	0.638273	1.42977	1.2674	100	10.7765	8.48486	1.16445	0.64072
Q96PD5	N-acetylmuramoyl-L-alanine amidase OS=Homo sapiens GN=PGLYRP2 PE=1 SV=1 - [PGRP2_HUMAN]	125.474	14.41	1	6	6	11	0.842715	0.966015	0.8711	0.971779	0.844108	1.3932	1.12061	1.09107	576	62.1779	7.54736	0.820859	0.173673
Q9UL92	Myosin-reactive immunoglobulin heavy chain variable region (Fragment) OS=Homo sapiens PE=2 SV=1 - [Q9UL92_HUMAN]	124.926	36.29	11	2	4	25	0.856518	0.930823	1.0605	1.14267	0.960234	0.987918	1.04267	0.911482	124	13.5716	8.42627	1.02307	0.763089
Q16610	Extracellular matrix protein 1 OS=Homo sapiens GN=ECM1 PE=1 SV=2 - [ECM1_HUMAN]	124.757	27.41	3	13	13	18	1.1076	0.899162	0.996033	0.926188	1.08353	0.964451	1.13739	1.10413	540	60.6353	6.7124	0.916064	0.186205
B1AKG0	Complement factor H-related protein 1 OS=Homo sapiens GN=CFHR1 PE=1 SV=1 - [B1AKG0_HUMAN]	123.712	31	6	2	8	15	0.600392	0.790045	0.976344	0.876852	1.17802	1.25551	1.1919	1.18232	271	30.8379	7.81104	0.674501	0.013879
A0A0C4DH25	Protein IGKV3D-20 (Fragment) OS=Homo sapiens GN=IGKV3D-20 PE=1 SV=1 - [A0A0C4DH25_HUMAN]	123.549	27.59	2	1	3	9	1.22324	1.284	0.958552	0.901293	1.09586	0.820178	0.904769	0.95346	116	12.5072	4.58936	1.15713	0.240333
A8K9J7	Histone H2B OS=Homo sapiens PE=2 SV=1 - [A8K9J7_HUMAN]	121.371	25.4	21	3	3	3	0.597215	2.05652	1.48424	1.11396	0.751472	1.03005	0.396662	0.484227	126	13.9876	10.3159	1.97295	0.124847
A0A0A0MSV6	Complement C1q subcomponent subunit B (Fragment) OS=Homo sapiens GN=C1QB PE=1 SV=4 - [A0A0A0MSV6_HUMAN]	121.243	22.81	4	5	5	11	1.04221	0.983712	0.959337	1.03239	0.903876	1.2204	0.97718	0.975735	228	24.0153	9.15869	0.985283	0.846182
A2IPI6	HRV Fab 027-VL (Fragment) OS=Homo sapiens PE=2 SV=1 - [A2IPI6_HUMAN]	119.855	20.35	1	1	2	30	1.04948	0.729081	1.12758	1.17398	1.04299	0.860948	1.06337	1.13885	113	12.3752	9.40771	0.993668	0.957691
P22792	Carboxypeptidase N subunit 2 OS=Homo sapiens GN=CPN2 PE=1 SV=3 - [CPN2_HUMAN]	119.037	17.98	1	8	8	14	1.09138	0.836912	0.955952	1.0415	1.05171	1.00571	1.1156	1.07672	545	60.5181	5.98584	0.923547	0.248766
A2MYD5	V2-6 protein (Fragment) OS=Homo sapiens GN=V2-6 PE=4 SV=1 - [A2MYD5_HUMAN]	117.857	28.42	3	1	2	4	1.59065	1.26525	0.913025	1.01178	0.835237	0.795974	0.916865	0.91453	95	10.204	7.12256	1.38059	0.115703
Q5NV74	V2-14 protein (Fragment) OS=Homo sapiens GN=V2-14 PE=4 SV=1 - [Q5NV74_HUMAN]	117.857	36.08	2	1	2	4	1.49689	0.81787	1.09018	1.25142	0.93998	0.83189	1.04078	0.832649	97	10.3539	4.99561	1.27702	0.175026
A0A068LL60	Ig heavy chain variable region (Fragment) OS=Homo sapiens PE=2 SV=1 - [A0A068LL60_HUMAN]	115.981	27.5	8	1	3	23	1.44043	0.95695	1.21099	1.15684	0.868931	0.771838	0.994555	0.89719	120	13.2613	7.92822	1.34871	0.0451123
P01775	Ig heavy chain V-III region LAY OS=Homo sapiens PE=1 SV=1 - [HV314_HUMAN]	115.812	15.97	1	1	1	4	1.17015	0.791774	1.00945	1.16335	0.933524	0.834955	1.13009	1.03238	119	12.8498	8.48486	1.05164	0.659647
P07360	Complement component C8 gamma chain OS=Homo sapiens GN=C8G PE=1 SV=3 - [CO8G_HUMAN]	114.604	42.57	2	7	7	15	0.961232	0.958064	0.848434	0.928829	1.09226	1.08766	1.00803	1.02181	202	22.2635	8.30908	0.87791	0.0100624
A0A068LKQ0	Ig heavy chain variable region (Fragment) OS=Homo sapiens PE=4 SV=1 - [A0A068LKQ0_HUMAN]	111.814	10	1	1	1	9	0.980481	0.958575	1.01713	0.949163	1.19134	1.29677	0.906865	0.902127	120	13.3445	5.98584	0.908774	0.402688
P06311	Ig kappa chain V-III region IARC/BL41 OS=Homo sapiens PE=4 SV=1 - [KV311_HUMAN]	110.86	11.72	1	1	1	3	0.949583	0.946171	1.10305	1.09701	1.42911	1.01027	0.756588	0.812529	128	14.0611	6.60986	1.0217	0.898353
A0A0F7TAV4	IGHV5-51 protein (Fragment) OS=Homo sapiens GN=IGHV5-51 PE=4 SV=1 - [A0A0F7TAV4_HUMAN]	110.609	28.18	2	1	3	10	0.642125	1.02559	0.968824	0.93386	1.26467	1.13214	1.08196	1.04162	110	12.1418	8.38232	0.789869	0.0634772
H6VRF8	Keratin 1 OS=Homo sapiens GN=KRT1 PE=3 SV=1 - [H6VRF8_HUMAN]	110.431	20.5	8	10	12	18	2.39601	0.665312	0.814958	1.57566	0.73457	0.609171	0.85218	0.708817	644	66.013	8.11865	1.87676	0.207786
P04430	Ig kappa chain V-I region BAN OS=Homo sapiens PE=1 SV=1 - [KV122_HUMAN]	109.358	16.67	1	1	1	3	1.0637	0.93343	1.06173	1.12733	1.19664	0.738237	1.04857	0.92713	108	11.8328	8.44092	1.07031	0.549328
I3L145	Sex hormone-binding globulin OS=Homo sapiens GN=SHBG PE=1 SV=1 - [I3L145_HUMAN]	109.22	16.28	14	5	5	8	0.868233	1.06032	0.92131	1.05722	0.873069	0.989609	1.02616	1.33983	344	37.4643	6.22705	0.923623	0.503985
B2R582	cDNA, FLJ92374, highly similar to Homo sapiens C-type lectin domain family 3, member B (CLEC3B), mRNA OS=Homo sapiens PE=2 SV=1 - [B2R582_HUMAN]	106.107	27.72	4	5	5	7	0.732355	1.0939	1.00311	1.1133	0.759203	1.1606	1.08658	1.05747	202	22.5223	6.03662	0.96998	0.814825
A2J1N4	Rheumatoid factor RF-IP24 (Fragment) OS=Homo sapiens PE=2 SV=1 - [A2J1N4_HUMAN]	104.387	27.55	4	1	2	12	1.14473	0.880429	0.92835	0.969502	1.00068	0.979194	1.06478	0.989205	98	10.8344	7.97217	0.972484	0.674368
E5RIF9	Carbonic anhydrase 1 (Fragment) OS=Homo sapiens GN=CA1 PE=1 SV=1 - [E5RIF9_HUMAN]	104.066	26.35	6	1	4	10	1.34659		0.942631	0.7925		0.877026	3.47903	1.02498	148	16.3079	6.25244	0.572756	0.460999
C9J0D1	Histone H2A OS=Homo sapiens GN=H2AFV PE=3 SV=1 - [C9J0D1_HUMAN]	103.707	31.15	19	2	2	3									122	13.155	9.99365	NA	NA
A0A068LKQ2	Ig heavy chain variable region (Fragment) OS=Homo sapiens PE=2 SV=1 - [A0A068LKQ2_HUMAN]	102.924	18.33	3	1	2	9	1.02495	0.890597	1.01063	1.1357	0.93484	1.00955	0.994404	1.08082	120	13.1496	9.0708	1.0107	0.86136
E7ENL6	Collagen alpha-3(VI) chain OS=Homo sapiens GN=COL6A3 PE=1 SV=2 - [E7ENL6_HUMAN]	102.845	3.46	9	7	7	11	0.785199	1.1275	0.968368	0.811501	1.1739	1.18595	0.947183	1.02549	2569	277.946	8.17725	0.852262	0.158735
A0A096LPE2	Protein SAA2-SAA4 OS=Homo sapiens GN=SAA2-SAA4 PE=4 SV=1 - [A0A096LPE2_HUMAN]	102.039	17.79	10	3	4	10	0.969587	1.10731	1.22196	1.27107	0.863	0.624133	1.06484	0.989705	208	23.3384	8.98291	1.29023	0.0770282
O75306	NADH dehydrogenase [ubiquinone] iron-sulfur protein 2, mitochondrial OS=Homo sapiens GN=NDUFS2 PE=1 SV=2 - [NDUS2_HUMAN]	101.13	4.97	2	1	1	1									463	52.5117	7.54736	NA	NA
Q96GW1	Endoplasmin OS=Homo sapiens GN=HSP90B1 PE=1 SV=1 - [Q96GW1_HUMAN]	99.93	9.84	4	1	1	1									315	35.4278	4.70361	NA	NA
P06889	Ig lambda chain V-IV region MOL OS=Homo sapiens PE=1 SV=1 - [LV405_HUMAN]	97.939	31.13	5	1	2	13	1.03718	1.2932	1.07836	1.3563	0.798567	1.02874	0.940563	0.781804	106	11.2648	4.42432	1.34159	0.0237157
Q6U2L6	C4B (Fragment) OS=Homo sapiens GN=C4B PE=4 SV=1 - [Q6U2L6_HUMAN]	97.705	15	4	1	4	9	1.01609	0.7511	1.21135	0.992955	1.09629	1.2954	0.976605	0.89498	100	10.2462	6.52197	0.931504	0.589773
P02461	Collagen alpha-1(III) chain OS=Homo sapiens GN=COL3A1 PE=1 SV=4 - [CO3A1_HUMAN]	97.6728	5.32	1	7	7	10	0.703398	1.08525	0.883975	0.872295	1.20862	1.22755	1.02677	1.04733	1466	138.479	6.60986	0.785635	0.0480316
A0N7I9	F5-20 (Fragment) OS=Homo sapiens GN=F5-20 PE=2 SV=1 - [A0N7I9_HUMAN]	96.6314	30.08	1	2	3	33	0.777482	1.06382	1.09953	1.0579	1.72065	0.629237	0.707995	0.738544	123	13.4108	9.1001	1.0532	0.861411
Q4LDE5	Sushi, von Willebrand factor type A, EGF and pentraxin domain-containing protein 1 OS=Homo sapiens GN=SVEP1 PE=1 SV=3 - [SVEP1_HUMAN]	96.6123	4.45	5	14	14	17	0.884052	1.10583	0.857288	0.920869	0.865523	1.33342	1.09166	1.10092	3571	389.912	5.50342	0.857923	0.219373
Q5JR01	Elongation factor 1-alpha 1 (Fragment) OS=Homo sapiens GN=EEF1A1 PE=1 SV=1 - [Q5JR01_HUMAN]	93.51	20	24	1	1	1									145	15.9263	8.39697	NA	NA
Q6PK56	EEF2 protein (Fragment) OS=Homo sapiens GN=EEF2 PE=2 SV=1 - [Q6PK56_HUMAN]	92.4691	13.89	6	3	3	3									583	64.7388	8.55811	NA	NA
Q0ZCJ6	Immunglobulin heavy chain variable region (Fragment) OS=Homo sapiens PE=4 SV=1 - [Q0ZCJ6_HUMAN]	90.77	34.4	5	1	4	15	0.882126	0.936115	0.948144	0.837458	1.71738	0.765082	0.912137	0.991816	125	13.4418	9.1001	0.821477	0.425372
Q5NV84	V1-3 protein (Fragment) OS=Homo sapiens GN=V1-3 PE=4 SV=1 - [Q5NV84_HUMAN]	88.395	16.16	4	1	2	12	0.804609	0.89513	0.890395	0.794491	2.25123	1.6574	0.588933	0.478003	99	10.4859	7.06396	0.680201	0.421803
B4DFL1	Dihydrolipoyl dehydrogenase OS=Homo sapiens PE=2 SV=1 - [B4DFL1_HUMAN]	88.38	7.19	4	1	1	1									459	48.8683	7.48877	NA	NA
B4DUI8	cDNA FLJ52761, highly similar to Actin, aortic smooth muscle OS=Homo sapiens PE=2 SV=1 - [B4DUI8_HUMAN]	88.3105	19.58	7	2	6	25	0.662188	1.85119	0.995533	1.07327	1.18956	0.97537	0.766075	0.748714	332	37.3387	5.5542	1.24511	0.453836
P02766	Transthyretin OS=Homo sapiens GN=TTR PE=1 SV=1 - [TTHY_HUMAN]	88.0607	42.18	9	6	6	19	1.04873	0.991172	1.07305	1.10224	0.97523	0.898814	1.10787	1.02212	147	15.877	5.75732	1.0527	0.3409
Q92954	Proteoglycan 4 OS=Homo sapiens GN=PRG4 PE=1 SV=2 - [PRG4_HUMAN]	87.1433	4.06	6	7	7	10	1.158	0.961821	0.829049	0.823838	0.557286	1.41352	1.19448	1.16747	1404	150.984	9.49561	0.87096	0.522439
H7BZ09	Acidic leucine-rich nuclear phosphoprotein 32 family member A OS=Homo sapiens GN=ANP32A PE=1 SV=1 - [H7BZ09_HUMAN]	85.3	36.71	6	1	1	1									79	9.18189	9.18799	NA	NA
A0A068LKQ8	Ig heavy chain variable region (Fragment) OS=Homo sapiens PE=2 SV=1 - [A0A068LKQ8_HUMAN]	84.7	26.09	1	1	2	14	1.29365	0.876133	0.808564	1.2357	0.819651	0.785914	1.34301	0.961308	115	12.4409	4.84326	1.07801	0.6824
Q9UL93	Myosin-reactive immunoglobulin heavy chain variable region (Fragment) OS=Homo sapiens PE=2 SV=1 - [Q9UL93_HUMAN]	83.8506	28.45	5	1	3	25	1.29947	1.11017	0.870776	1.03389	0.960054	0.965839	0.809743	1.1399	116	12.4261	8.83643	1.113	0.366702
A0A0C4DGV7	Retinol-binding protein 4 OS=Homo sapiens GN=RBP4 PE=1 SV=1 - [A0A0C4DGV7_HUMAN]	83.2461	19.6	3	4	4	12	0.892239	0.887946	1.00582	0.96279	0.992748	0.978273	1.1377	1.19568	199	22.8532	5.71924	0.870848	0.0764258
Q6FHW3	DF protein OS=Homo sapiens GN=DF PE=2 SV=1 - [Q6FHW3_HUMAN]	82.8287	34.21	4	4	4	7	1.16888	0.993938	0.865615	0.937909	0.825082	1.11267	1.07911	1.04041	228	24.4074	7.23975	0.977816	0.814027
B4DVE1	cDNA FLJ53478, highly similar to Galectin-3-binding protein OS=Homo sapiens PE=2 SV=1 - [B4DVE1_HUMAN]	82.8058	13.26	15	7	7	14	1.1861	1.10037	0.854897	0.845514	0.842516	1.12457	1.07443	1.04665	573	64.0558	5.46533	0.975055	0.818984
D3DUU0	CD163 antigen, isoform CRA_a OS=Homo sapiens GN=CD163 PE=4 SV=1 - [D3DUU0_HUMAN]	81.9681	5.43	5	5	5	6	1.36525	1.11408	0.956186	0.909408	0.79441	1.01796	0.949144	1.01661	994	107.349	5.69385	1.14981	0.281214
P03952	Plasma kallikrein OS=Homo sapiens GN=KLKB1 PE=1 SV=1 - [KLKB1_HUMAN]	81.6591	20.69	7	13	13	17	0.947247	0.867557	1.00578	0.999654	0.951759	1.19196	1.0787	1.09746	638	71.3228	8.22119	0.884491	0.0857794
B4DF70	cDNA FLJ60461, highly similar to Peroxiredoxin-2 (EC 1.11.1.15) OS=Homo sapiens PE=2 SV=1 - [B4DF70_HUMAN]	80.8618	28.96	4	6	6	12	0.606191	1.17347	1.12299	1.06815	0.544804	0.877926	1.36214	1.32383	183	20.0946	8.77783	0.966172	0.887705
P23083	Ig heavy chain V-I region V35 OS=Homo sapiens PE=1 SV=1 - [HV103_HUMAN]	80.3135	36.75	7	2	4	16	1.16734	0.885107	1.02833	1.00881	1.36293	0.846855	0.95925	1.02392	117	13.0004	9.5542	0.975197	0.844543
H3BQN4	Fructose-bisphosphate aldolase OS=Homo sapiens GN=ALDOA PE=1 SV=1 - [H3BQN4_HUMAN]	79.9281	12.19	19	4	5	8	0.924398	1.29995	1.01101	1.05584	0.935417	0.974851	1.0186	0.910263	361	39.3154	8.39697	1.11774	0.258663
K7EK07	Histone H3 (Fragment) OS=Homo sapiens GN=H3F3B PE=1 SV=1 - [K7EK07_HUMAN]	79.4277	31.06	13	1	2	2									132	14.9053	11.2974	NA	NA
Q0ZCI2	Immunglobulin heavy chain variable region (Fragment) OS=Homo sapiens PE=4 SV=1 - [Q0ZCI2_HUMAN]	79.23	23.77	2	2	3	11	1.12442	0.994668	1.26058	1.21939	0.790519	0.87724	1.00549	0.953498	122	13.3157	9.1001	1.26834	0.0191687
P23142	Fibulin-1 OS=Homo sapiens GN=FBLN1 PE=1 SV=4 - [FBLN1_HUMAN]	79.1518	20.34	10	5	13	24	0.940459	1.11628	0.887649	0.897509	1.11404	1.18901	0.959417	0.97918	703	77.1624	5.22412	0.905918	0.239678
A0A0C4DH35	Protein IGHV3-35 (Fragment) OS=Homo sapiens GN=IGHV3-35 PE=1 SV=1 - [A0A0C4DH35_HUMAN]	79.033	16.24	1	2	2	8	0.972852	1.15579	0.975533	0.950597	0.999602	1.04203	0.989741	0.946241	117	12.8023	7.88428	1.01961	0.724577
A0A075B6H7	Protein IGKV3-7 (Fragment) OS=Homo sapiens GN=IGKV3-7 PE=4 SV=1 - [A0A075B6H7_HUMAN]	78.677	23.28	2	1	2	15	0.96022	0.891991	1.0688	0.897673	1.00779	1.2515	1.01319	0.99229	116	12.7754	5.24951	0.895428	0.192161
B7Z5E7	cDNA FLJ51046, highly similar to 60 kDa heat shock protein, mitochondrial OS=Homo sapiens PE=2 SV=1 - [B7Z5E7_HUMAN]	77.94	9.67	8	3	3	3									517	55.0491	5.60498	NA	NA
P05164	Myeloperoxidase OS=Homo sapiens GN=MPO PE=1 SV=1 - [PERM_HUMAN]	77.3577	12.08	3	6	6	11	1.14742	1.78219	1.02214	0.990648	0.811154	1.08894	0.914915	0.801832	745	83.8148	8.96826	1.36633	0.172244
Q5NV64	V2-11 protein (Fragment) OS=Homo sapiens GN=V2-11 PE=4 SV=1 - [Q5NV64_HUMAN]	77.2733	21.65	3	2	2	3	1.40871	0.80364	0.962307	1.06319	1.34105	0.8345	0.913114	0.936266	97	10.5321	4.77979	1.05318	0.76557
V9GYE7	Complement factor H-related protein 2 OS=Homo sapiens GN=CFHR2 PE=1 SV=1 - [V9GYE7_HUMAN]	77.2096	21.65	3	2	5	10	0.859008	0.921346	0.991306	1.04021	1.33068	1.03927	0.947124	1.02681	254	28.8929	6.81494	0.877302	0.221102
P08253	72 kDa type IV collagenase OS=Homo sapiens GN=MMP2 PE=1 SV=2 - [MMP2_HUMAN]	76.1031	12.88	8	8	8	13	0.921934	1.10702	0.925756	0.997392	1.08527	1.16263	1.08339	1.05347	660	73.8347	5.46533	0.90146	0.0840044
A0A087WW43	Inter-alpha-trypsin inhibitor heavy chain H3 OS=Homo sapiens GN=ITIH3 PE=1 SV=1 - [A0A087WW43_HUMAN]	75.96	15.07	4	9	9	13	0.909364	0.731645	0.898706	0.862033	1.51057	1.12214	1.06376	1.06506	670	75.0311	5.85889	0.714406	0.0439998
P01605	Ig kappa chain V-I region Lay OS=Homo sapiens PE=1 SV=1 - [KV113_HUMAN]	74.8304	31.48	1	2	3	15	1.22414	1.14985	1.02767	1.14531	0.791617	0.93201	0.861131	0.935077	108	11.8268	7.95752	1.29176	0.00307173
B4DUV1	Fibulin-1 OS=Homo sapiens PE=2 SV=1 - [B4DUV1_HUMAN]	74.5986	16.22	11	2	10	16	1.25826	1.21639	0.82878	0.937302	0.937953	1.13292	0.862538	0.993439	641	70.1077	5.26221	1.0797	0.543351
B6EDE2	Epididymis luminal protein 180 (Fragment) OS=Homo sapiens GN=HEL180 PE=2 SV=1 - [B6EDE2_HUMAN]	74.3258	27.64	4	2	3	14	1.18442	1.06017	1.15445	1.03314	0.783119	1.08504	0.989994	0.956596	123	13.2795	5.45264	1.16147	0.0902871
B4DN06	Ribosomal protein L3, isoform CRA_i OS=Homo sapiens GN=RPL3 PE=2 SV=1 - [B4DN06_HUMAN]	74.24	22.13	11	1	1	1									122	13.9074	10.4331	NA	NA
A2NYV4	Light chain Fab (Fragment) OS=Homo sapiens PE=2 SV=1 - [A2NYV4_HUMAN]	73.8586	22.32	5	2	3	15	0.963495	1.10242	0.841571	0.936329	1.01543	1.08059	0.900368	0.839148	112	11.6826	5.96045	1.00209	0.98004
A0N7J6	REV25-2 (Fragment) OS=Homo sapiens PE=2 SV=1 - [A0N7J6_HUMAN]	73.4	22.39	1	2	2	4	0.999459	0.966125	0.975067	0.973137	1.12704	1.00495	0.962966	1.00011	134	14.5254	6.56592	0.955556	0.293731
G1FM90	Anti-Influenza A hemagglutinin heavy chain variable region (Fragment) OS=Homo sapiens PE=2 SV=1 - [G1FM90_HUMAN]	73.2917	22.48	5	2	3	27	0.952252	1.19604	0.947491	0.915577	1.18069	0.942658	0.958621	1.00509	129	14.5101	8.42627	0.981164	0.828212
A0A024RDT5	Periostin, osteoblast specific factor, isoform CRA_a OS=Homo sapiens GN=POSTN PE=4 SV=1 - [A0A024RDT5_HUMAN]	73.0245	5.65	6	4	4	6	0.745313	0.915645	1.02792	1.05538	1.59032	0.82277	1.00783	1.01822	779	86.9657	7.81104	0.843433	0.389816
A0A087WU91	Protein IGHV3-49 OS=Homo sapiens GN=IGHV3-49 PE=1 SV=1 - [A0A087WU91_HUMAN]	72.98	38.6	3	3	4	10	0.53049	0.88129	1.14787	1.09908	1.46494	1.33474	0.930362	0.895168	114	12.3242	8.92432	0.790919	0.274144
A2NB44	Cold agglutinin FS-2 H-chain (Fragment) OS=Homo sapiens GN=IGH@ PE=2 SV=1 - [A2NB44_HUMAN]	72.2524	27.19	5	1	3	14	1.37981	0.927177	0.890484	1.21947	1.21554	0.987678	0.766309	0.7354	114	12.7532	7.10791	1.1919	0.315863
P35527	Keratin, type I cytoskeletal 9 OS=Homo sapiens GN=KRT9 PE=1 SV=3 - [K1C9_HUMAN]	71.1172	8.19	4	4	5	6	1.99378	0.598108	1.04887	0.971121	0.914405	0.61001	0.86418	0.94071	623	62.0268	5.23682	1.3854	0.364318
P00441	Superoxide dismutase [Cu-Zn] OS=Homo sapiens GN=SOD1 PE=1 SV=2 - [SODC_HUMAN]	69.4902	15.58	6	2	2	2	0.942149	0.964668	1.15521	0.977409	0.858431	1.11241	1.09001	1.0756	154	15.9259	6.12549	0.976547	0.763153
P06888	Ig lambda chain V-I region EPS OS=Homo sapiens PE=1 SV=1 - [LV109_HUMAN]	69.49	21.1	2	1	2	9	0.955349	0.855356	1.13032	1.19221	1.01365	0.828445	1.14841	1.10251	109	11.4067	9.29053	1.00953	0.929142
L8E853	von Willebrand factor OS=Homo sapiens GN=VWF PE=4 SV=1 - [L8E853_HUMAN]	68.1786	4.24	3	8	8	10	1.0473	0.837463	0.916725	0.926413	1.44773	0.988778	1.03139	1.07066	2715	298.181	5.47803	0.821106	0.150693
A0A087WUS7	Ig delta chain C region OS=Homo sapiens GN=IGHD PE=1 SV=1 - [A0A087WUS7_HUMAN]	68.0672	16.93	4	5	5	5	1.54247	1.06908	1.18274	1.00198	0.755722	0.928955	1.00112	0.832919	384	42.3263	8.11865	1.36289	0.070177
Q8TBA7	HSP90AA1 protein (Fragment) OS=Homo sapiens GN=HSP90AA1 PE=2 SV=2 - [Q8TBA7_HUMAN]	67.98	6.11	14	2	2	2	1.29073	0.910412	0.957736	1.18009	0.868645	1.15867	1.05532	0.806405	638	73.7803	5.16064	1.11571	0.391925
B4DN75	cDNA FLJ60724, highly similar to Cartilage oligomeric matrix protein OS=Homo sapiens PE=2 SV=1 - [B4DN75_HUMAN]	67.7077	9.06	6	2	4	5	1.01027	1.01317	0.920128	1.03718	0.968279	1.31595	1.12198	0.969855	684	75.0538	4.62744	0.909506	0.321885
P02452	Collagen alpha-1(I) chain OS=Homo sapiens GN=COL1A1 PE=1 SV=5 - [CO1A1_HUMAN]	67.3191	9.49	6	5	12	15	0.955009	1.05577	1.05443	1.04764	0.963239	0.948	1.07116	1.03649	1464	138.857	5.79541	1.02364	0.557774
A0A024R2V2	Microtubule-associated protein 4, isoform CRA_e OS=Homo sapiens GN=MAP4 PE=4 SV=1 - [A0A024R2V2_HUMAN]	66.62	4.93	5	1	1	1									548	59.2253	4.43701	NA	NA
P41222	Prostaglandin-H2 D-isomerase OS=Homo sapiens GN=PTGDS PE=1 SV=1 - [PTGDS_HUMAN]	66.5313	24.74	3	4	4	10	0.855873	1.13963	0.909357	0.893686	1.02711	1.4034	0.980049	1.04337	190	21.0153	7.79639	0.853133	0.218481
P01773	Ig heavy chain V-III region BUR OS=Homo sapiens PE=1 SV=1 - [HV312_HUMAN]	65.0333	15.97	1	2	3	8	1.21998	1.2485	0.889374	0.880552	1.03471	1.05913	0.94541	0.926529	119	12.9726	9.59814	1.06884	0.558932
O75882	Attractin OS=Homo sapiens GN=ATRN PE=1 SV=2 - [ATRN_HUMAN]	64.8033	8.75	2	11	11	16	1.12799	0.95947	1.04519	0.947507	1.03531	0.996152	1.01205	1.03471	1429	158.432	7.31299	1.00049	0.991407
P05154	Plasma serine protease inhibitor OS=Homo sapiens GN=SERPINA5 PE=1 SV=3 - [IPSP_HUMAN]	64.75	11.33	12	4	4	6	0.84526	0.984766	0.879558	0.855395	0.710196	1.60796	1.45749	1.10219	406	45.6457	9.26123	0.730982	0.199641
A0A0A0MT74	Protein IGKV1-16 (Fragment) OS=Homo sapiens GN=IGKV1-16 PE=1 SV=1 - [A0A0A0MT74_HUMAN]	64.3793	13.68	1	1	1	5	0.873702	1.11872	1.07776	1.09781	0.598704	1.38077	0.98177	1.05182	117	12.6102	8.1626	1.03861	0.831784
Q7Z612	Acidic ribosomal phosphoprotein P1 OS=Homo sapiens PE=2 SV=1 - [Q7Z612_HUMAN]	63.88	23.01	2	1	1	1									113	11.3917	4.36084	NA	NA
Q7Z2E8	Rearranged Vl3l gene segment (Fragment) OS=Homo sapiens GN=VL3L PE=4 SV=1 - [Q7Z2E8_HUMAN]	63.47	23.46	2	1	2	6	0.953469	0.974981	1.04434	1.04418	1.11242	0.971219	1.04017	1.0541	81	8.69704	5.90967	0.961456	0.323866
M0QZL1	Flavin reductase (NADPH) OS=Homo sapiens GN=BLVRB PE=1 SV=1 - [M0QZL1_HUMAN]	62.61	9.74	3	1	1	1	0.840751	1.32286	0.971711	1.23562	0.362199	1.18365	0.868941	1.3036	154	15.6599	5.45264	1.17558	0.526623
Q9UL82	Myosin-reactive immunoglobulin light chain variable region (Fragment) OS=Homo sapiens PE=2 SV=1 - [Q9UL82_HUMAN]	62.31	43.93	1	3	4	18	1.23988	1.02024	0.998952	0.920492	0.983773	1.0012	0.974634	0.959574	107	11.4377	6.59521	1.06607	0.415863
B0AZL7	cDNA, FLJ79457, highly similar to Insulin-like growth factor-binding proteincomplex acid labile chain OS=Homo sapiens PE=2 SV=1 - [B0AZL7_HUMAN]	61.53	2.31	3	1	1	1	0.541061	0.722799	2.32615	1.62134	1.00009	0.528586	0.819304	0.788905	605	65.9598	6.78564	1.66114	0.302772
A0A0B4J1V6	Protein IGHV3-73 (Fragment) OS=Homo sapiens GN=IGHV3-73 PE=1 SV=1 - [A0A0B4J1V6_HUMAN]	61.51	24.37	4	1	3	14	1.24911	1.08739	0.87079	0.940881	0.865847	1.15172	0.975325	1.04644	119	12.8494	9.17334	1.02699	0.801323
B2R815	cDNA, FLJ93695, highly similar to Homo sapiens serpin peptidase inhibitor, clade A (alpha-1 antiproteinase, antitrypsin), member 4 (SERPINA4), mRNA OS=Homo sapiens PE=2 SV=1 - [B2R815_HUMAN]	61.34	19.2	2	7	7	12	0.993317	1.02734	0.886304	0.836935	1.00354	1.18294	1.07158	1.10065	427	48.4951	7.75244	0.858486	0.03867
A0A087WSY5	Carboxypeptidase B2 OS=Homo sapiens GN=CPB2 PE=1 SV=1 - [A0A087WSY5_HUMAN]	61.24	4.92	2	2	2	2	0.895119	0.863215	0.900925	1.14493	1.09649	1.24244	1.0231	0.927769	386	43.9942	7.7085	0.88692	0.23979
P80419	Ig heavy chain V-III region GAR OS=Homo sapiens PE=1 SV=1 - [HV322_HUMAN]	61.1808	25.42	1	2	2	5	1.00229	0.876932	0.944643	1.1414	1.16021	1.001	1.08674	1.01211	118	13.0792	4.80518	0.930751	0.320508
Q15582	Transforming growth factor-beta-induced protein ig-h3 OS=Homo sapiens GN=TGFBI PE=1 SV=1 - [BGH3_HUMAN]	61.0733	8.49	11	5	5	8	0.978524	1.16326	0.930722	0.688774	1.19879	1.22704	0.973839	0.979687	683	74.634	7.7085	0.858904	0.247728
Q9UL86	Myosin-reactive immunoglobulin kappa chain variable region (Fragment) OS=Homo sapiens PE=2 SV=1 - [Q9UL86_HUMAN]	60.9624	51.38	2	2	4	7	1.12003	1.14114	1.00421	0.933681	1.29277	1.01062	0.964997	0.971689	109	11.921	7.95752	0.990097	0.913816
V9GYE3	Apolipoprotein A-II OS=Homo sapiens GN=APOA2 PE=1 SV=1 - [V9GYE3_HUMAN]	60.73	36.54	6	3	3	8	0.841511	1.03488	1.29644	1.41658	0.66129	0.911643	0.932516	1.0079	52	5.87309	6.60986	1.3062	0.134322
V9H1C1	Gelsolin exon 4 (Fragment) OS=Homo sapiens PE=4 SV=1 - [V9H1C1_HUMAN]	60.28	34.78	1	1	3	4	0.745562	0.886939	0.878363	0.927169	0.880272	1.41402	1.08838	1.29974	69	7.97411	5.78271	0.734302	0.0726647
A0A087WTA8	Collagen alpha-2(I) chain OS=Homo sapiens GN=COL1A2 PE=1 SV=1 - [A0A087WTA8_HUMAN]	59.7664	6.6	3	7	7	8	0.916114	0.972282	0.955533	0.970678	1.02101	1.09171	1.04076	1.02247	1364	129.072	9.01221	0.913554	0.00601038
Q6LAM1	Heavy chain of factor I (Fragment) OS=Homo sapiens PE=2 SV=1 - [Q6LAM1_HUMAN]	59.461	35.83	6	1	12	22	0.799043	1.10237	1.00237	0.879058	1.4612	1.02462	0.919965	0.94658	321	35.8589	7.59131	0.868826	0.367607
P0DJI8	Serum amyloid A-1 protein OS=Homo sapiens GN=SAA1 PE=1 SV=1 - [SAA1_HUMAN]	59.4283	36.89	8	2	4	5	1.24203	0.965503	0.787961	0.927824	1.42849	0.84375	0.948235	0.98445	122	13.5235	6.78564	0.933397	0.678983
A0PJG0	THBS1 protein (Fragment) OS=Homo sapiens GN=THBS1 PE=2 SV=1 - [A0PJG0_HUMAN]	58.91	5.24	3	2	2	3	0.693889	1.30594	0.929637	0.85575	1.04564	0.976794	1.26061	1.15851	401	43.9159	5.93506	0.852127	0.312862
A0N5G7	Rheumatoid factor D5 heavy chain (Fragment) OS=Homo sapiens GN=VH3 PE=2 SV=1 - [A0N5G7_HUMAN]	58.65	9.24	1	1	1	5	1.00054	1.15006	1.02681	0.976808	0.939189	0.947986	1.02413	1.04655	119	12.9784	8.93896	1.04977	0.339568
A0A024RAB6	Heparan sulfate proteoglycan 2 (Perlecan), isoform CRA_b OS=Homo sapiens GN=HSPG2 PE=4 SV=1 - [A0A024RAB6_HUMAN]	57.597	1.61	4	5	5	5	0.864461	1.06767	0.995788	1.22433	0.948331	1.0106	1.00391	0.957837	4346	463.723	6.50732	1.05891	0.501984
A0N8J1	V(k)3 sequence of NG9 gene from fetal liver DNA (Fragment) OS=Homo sapiens PE=4 SV=1 - [A0N8J1_HUMAN]	56.99	16.16	2	1	1	1	1.52794	1.22768	1.08993	1.15581	0.854754	0.430743	1.09574	0.907297	99	10.7642	8.29443	1.52083	0.0507034
D3DTX7	Collagen, type I, alpha 1, isoform CRA_a OS=Homo sapiens GN=COL1A1 PE=4 SV=1 - [D3DTX7_HUMAN]	56.7779	11.07	1	1	8	9	1.64598	0.872675	0.965729	1.02937	1.23525	0.878752	0.749099	0.912575	885	84.6883	6.23975	1.19544	0.407493
Q15113	Procollagen C-endopeptidase enhancer 1 OS=Homo sapiens GN=PCOLCE PE=1 SV=2 - [PCOC1_HUMAN]	56.76	20.04	3	7	7	15	0.869639	1.03446	0.985687	0.98821	1.04566	1.21268	0.981374	0.928483	449	47.942	7.43018	0.930422	0.357036
B7Z1C9	Chaperonin containing TCP1, subunit 7 (Eta), isoform CRA_a OS=Homo sapiens GN=CCT7 PE=2 SV=1 - [B7Z1C9_HUMAN]	56.22	5.3	5	1	1	1									415	46.0655	7.6499	NA	NA
Q12841	Follistatin-related protein 1 OS=Homo sapiens GN=FSTL1 PE=1 SV=1 - [FSTL1_HUMAN]	55.74	10.39	5	4	4	6	0.85437	1.04309	0.75953	0.817807	1.13348	1.32101	1.01215	1.06161	308	34.9629	5.51611	0.767447	0.0282415
P80108	Phosphatidylinositol-glycan-specific phospholipase D OS=Homo sapiens GN=GPLD1 PE=1 SV=3 - [PHLD_HUMAN]	55.48	5.36	1	3	3	3	1.04804	0.873882	1.01524	0.998099	0.973061	1.26212	0.990312	1.15323	840	92.278	6.3667	0.898812	0.222823
Q6UXM4	Ficolin (Collagen/fibrinogen domain containing) 3 (Hakata antigen), isoform CRA_b OS=Homo sapiens GN=FCN3 PE=2 SV=1 - [Q6UXM4_HUMAN]	55.09	20.14	10	7	7	11	1.47665	0.80191	0.943589	0.897845	1.17474	1.00174	1.00772	0.968042	288	31.6574	6.84424	0.992295	0.962513
A2N0U4	VH6DJ protein (Fragment) OS=Homo sapiens GN=VH6DJ PE=2 SV=1 - [A2N0U4_HUMAN]	54.39	17.92	1	1	2	3	0.910437	0.790085	0.965118	1.0394	0.946854	1.03193	1.20721	1.30071	106	11.7934	5.36377	0.825496	0.0957839
Q8TE63	Immunglobulin light chain variable region (Fragment) OS=Homo sapiens PE=2 SV=1 - [Q8TE63_HUMAN]	53.7267	22.73	3	2	3	11	0.809107	1.17401	1.19392	1.06103	0.931526	1.37677	0.776599	0.711214	110	11.4717	8.90967	1.11614	0.555099
P20851	C4b-binding protein beta chain OS=Homo sapiens GN=C4BPB PE=1 SV=1 - [C4BPB_HUMAN]	53.57	15.08	3	3	3	6	0.979888	0.815136	1.03746	0.893383	1.30224	1.07563	1.03602	0.968614	252	28.3384	5.13525	0.849875	0.114739
Q8IZD7	Anti-thyroglobulin heavy chain variable region (Fragment) OS=Homo sapiens PE=2 SV=1 - [Q8IZD7_HUMAN]	53.39	6.92	1	1	1	1	0.758812	1.10075	1.47866	1.50394	0.995848	0.67222	0.909614	0.799731	130	13.8927	8.45557	1.43369	0.127506
P13645	Keratin, type I cytoskeletal 10 OS=Homo sapiens GN=KRT10 PE=1 SV=6 - [K1C10_HUMAN]	53.3	13.36	25	6	8	11	1.28683	0.703992	0.909198	1.70098	0.778133	0.8016	0.813199	0.983344	584	58.7917	5.21143	1.36286	0.259075
Q2F838	Eukaryotic translation elongation factor 1 gamma (Fragment) OS=Homo sapiens PE=2 SV=1 - [Q2F838_HUMAN]	53.03	32.18	4	1	1	1									87	9.62473	6.771	NA	NA
Q9Y5Y7	Lymphatic vessel endothelial hyaluronic acid receptor 1 OS=Homo sapiens GN=LYVE1 PE=1 SV=2 - [LYVE1_HUMAN]	53.0067	11.49	1	4	4	8	1.22661	1.0122	0.898291	0.840553	0.994256	1.04968	1.04794	1.03157	322	35.191	8.27979	0.964597	0.699471
I3L3P5	Protein disulfide-isomerase (Fragment) OS=Homo sapiens GN=P4HB PE=1 SV=1 - [I3L3P5_HUMAN]	52.84	19.23	5	1	1	1									156	16.8656	4.75439	NA	NA
A0A0F7T8I6	IGHV4-31 protein (Fragment) OS=Homo sapiens GN=IGHV4-31 PE=4 SV=1 - [A0A0F7T8I6_HUMAN]	52.03	15	3	1	2	8	0.843437	1.20603	0.958675	0.973607	1.48326	0.820862	0.895074	0.875698	100	10.8393	8.44092	0.977178	0.899151
P04406	Glyceraldehyde-3-phosphate dehydrogenase OS=Homo sapiens GN=GAPDH PE=1 SV=3 - [G3P_HUMAN]	51.73	16.42	8	5	5	6	0.97533	1.90046	0.935809	0.824844	0.826256	0.997603	0.789539	0.853096	335	36.0304	8.45557	1.33718	0.327211
Q5NV83	V3-3 protein (Fragment) OS=Homo sapiens GN=V3-3 PE=4 SV=1 - [Q5NV83_HUMAN]	51.62	18.37	2	1	2	6	1.02931	0.826265	1.41557	1.38343	0.909568	1.16982	0.770307	0.75155	98	10.3781	7.28369	1.29206	0.184187
P35908	Keratin, type II cytoskeletal 2 epidermal OS=Homo sapiens GN=KRT2 PE=1 SV=2 - [K22E_HUMAN]	51.0086	10.49	19	4	6	7	1.20468	0.880026	1.11482	1.8339	0.734069	0.706714	1.02328	0.822033	639	65.3932	8.00146	1.53195	0.11806
A0A0G2JRQ6	Uncharacterized protein (Fragment) OS=Homo sapiens PE=1 SV=2 - [A0A0G2JRQ6_HUMAN]	50.7967	29.06	1	2	3	11	1.21182	1.19409	0.774623	0.911129	1.65424	0.484742	0.937543	1.09181	117	12.7403	8.29443	0.98153	0.945278
E5FY30	Glycoprotein Ib (Fragment) OS=Homo sapiens PE=4 SV=1 - [E5FY30_HUMAN]	50.51	6.21	11	1	1	2	1.19505	0.965524	1.0052	1.14735	1.07436	0.867397	1.03396	0.91855	177	19.7394	5.84619	1.1076	0.20346
P01833	Polymeric immunoglobulin receptor OS=Homo sapiens GN=PIGR PE=1 SV=4 - [PIGR_HUMAN]	50.27	10.47	1	9	9	12	1.97045	1.07064	0.765963	0.890298	1.12608	0.745497	0.817416	0.830015	764	83.2317	5.74463	1.33513	0.36637
A0A0A0MS11	Protein IGHV3-13 (Fragment) OS=Homo sapiens GN=IGHV3-13 PE=1 SV=1 - [A0A0A0MS11_HUMAN]	49.7566	18.97	4	1	2	7	1.21353	1.15541	0.995646	0.962954	0.856526	1.12833	0.916824	0.829527	116	12.4982	7.07861	1.1597	0.152524
B7Z1N6	Fructose-bisphosphate aldolase OS=Homo sapiens PE=2 SV=1 - [B7Z1N6_HUMAN]	49.63	9.23	18	1	2	2	1.40532	1.0621	0.870844	1.11879	0.768789	1.01758	0.961813	1.00882	325	35.4011	7.06396	1.186	0.226024
A2NYU8	Heavy chain Fab (Fragment) OS=Homo sapiens PE=2 SV=1 - [A2NYU8_HUMAN]	49.22	13.79	1	1	1	1	1.15185	0.679169	1.27634	1.05004	0.880323	1.03744	1.29772	0.924148	116	12.6674	9.20264	1.00435	0.978451
B2RC09	cDNA, FLJ95794, highly similar to Homo sapiens apolipoprotein F (APOF), mRNA OS=Homo sapiens PE=2 SV=1 - [B2RC09_HUMAN]	48.66	4.29	2	1	1	1	0.687458	0.93226	0.813385	1.15578	1.47019	1.01922	0.982436	1.06251	326	35.351	5.64307	0.791354	0.169206
D6REX5	Selenoprotein P (Fragment) OS=Homo sapiens GN=SEPP1 PE=1 SV=1 - [D6REX5_HUMAN]	48.2079	8.39	3	3	3	6	1.05887	0.86722	1.07165	0.962285	0.774673	1.29419	1.05575	1.05101	310	35.0934	7.66455	0.948276	0.665772
C9JYS1	Dystroglycan (Fragment) OS=Homo sapiens GN=DAG1 PE=1 SV=6 - [C9JYS1_HUMAN]	48.12	16.84	5	1	1	1	0.480963	1.29818	0.643303	0.838912	0.959123	1.56283	1.28399	0.956163	95	10.2313	5.2876	0.684796	0.154643
Q5NV92	V5-6 protein (Fragment) OS=Homo sapiens GN=V5-6 PE=4 SV=1 - [Q5NV92_HUMAN]	47.92	10.1	3	1	1	3	1.43176	1.14583	1.03649	0.958243	0.925935	0.950628	0.846847	0.914828	99	10.567	6.26514	1.25639	0.107855
P06733	Alpha-enolase OS=Homo sapiens GN=ENO1 PE=1 SV=2 - [ENOA_HUMAN]	46.98	5.99	6	3	3	4	0.87027	1.49485	1.12806	1.10721	0.957554	0.859171	0.81461	0.770166	434	47.1393	7.38623	1.35215	0.0989802
D6CHE9	Proteinase 3 OS=Homo sapiens GN=PRTN3 PE=2 SV=1 - [D6CHE9_HUMAN]	46.97	5.58	3	1	1	2	0.974799	1.10803	0.945441	0.959902	0.877354	1.1083	1.1188	0.985118	215	23.61	8.1626	0.9753	0.726475
P02743	Serum amyloid P-component OS=Homo sapiens GN=APCS PE=1 SV=2 - [SAMP_HUMAN]	46.9445	18.39	1	4	4	6	0.509249	0.777656	1.01278	0.93912	1.22152	1.23894	1.26316	1.04004	223	25.3711	6.53662	0.679891	0.033673
Q53T09	Putative uncharacterized protein XRCC5 (Fragment) OS=Homo sapiens GN=XRCC5 PE=4 SV=1 - [Q53T09_HUMAN]	46.74	4.58	2	1	1	1									568	64.2029	5.99854	NA	NA
A0A0J9YWU9	Uncharacterized protein (Fragment) OS=Homo sapiens PE=1 SV=1 - [A0A0J9YWU9_HUMAN]	46.3957	25	5	1	3	13	0.985176	0.883691	1.20013	1.1507	1.21691	1.0363	0.848957	0.898328	116	12.9346	9.05615	1.055	0.635997
A6NHK2	Small nuclear ribonucleoprotein E OS=Homo sapiens GN=SNRPE PE=1 SV=1 - [A6NHK2_HUMAN]	46.36	48.08	2	1	1	1									52	5.92103	5.94775	NA	NA
H0YLF3	Beta-2-microglobulin (Fragment) OS=Homo sapiens GN=B2M PE=1 SV=1 - [H0YLF3_HUMAN]	45.75	28.17	8	2	2	4	0.885538	1.01763	1.10995	1.10383	1.20982	0.929414	0.936396	0.930623	71	8.49315	5.14795	1.02796	0.759201
Q5NV65	V1-5 protein (Fragment) OS=Homo sapiens GN=V1-5 PE=4 SV=1 - [Q5NV65_HUMAN]	45.4	13.13	2	1	1	2	0.492007	0.969705	0.853793	0.826367	0.999938	1.38042	1.23996	1.30837	99	10.3769	4.81787	0.637581	0.0157306
P07737	Profilin-1 OS=Homo sapiens GN=PFN1 PE=1 SV=2 - [PROF1_HUMAN]	45.3178	49.29	3	6	6	9	1.02717	1.41364	1.09562	1.06455	0.967676	0.906246	0.931142	0.703061	140	15.0446	8.26514	1.31186	0.048753
K7EKY0	Interleukin enhancer-binding factor 3 (Fragment) OS=Homo sapiens GN=ILF3 PE=1 SV=1 - [K7EKY0_HUMAN]	44.91	19.62	9	1	1	1									158	17.0099	5.8208	NA	NA
A2NW98	Rheumatoid factor light chain variable region (Fragment) OS=Homo sapiens PE=2 SV=1 - [A2NW98_HUMAN]	44.8433	6.72	1	1	1	4	0.848448	1.21836	1.04891	0.980249	1.00896	1.15897	0.959095	1.15038	134	14.7864	7.12256	0.957447	0.641168
Q04756	Hepatocyte growth factor activator OS=Homo sapiens GN=HGFAC PE=1 SV=1 - [HGFA_HUMAN]	44.64	2.9	2	1	1	1	1.96429	1.73304	0.849002	0.551148	1.02573	0.362571	1.1905	0.628068	655	70.6361	7.23975	1.58884	0.282333
R4GMP9	Lysine-specific histone demethylase 1A (Fragment) OS=Homo sapiens GN=KDM1A PE=1 SV=6 - [R4GMP9_HUMAN]	44.51	8.97	3	1	1	1									301	32.3916	8.25049	NA	NA
Q6P4B4	PFAS protein (Fragment) OS=Homo sapiens GN=PFAS PE=2 SV=1 - [Q6P4B4_HUMAN]	44.36	4.01	5	1	1	1									748	80.1348	5.5542	NA	NA
Q8N863	cDNA FLJ39940 fis, clone SPLEN2022522 OS=Homo sapiens PE=2 SV=1 - [Q8N863_HUMAN]	44.13	4.57	1	1	1	1	0.927072	1.04929	1.06908	1.24873	1.09963	0.775552	1.04914	0.976515	175	18.2293	7.25439	1.10046	0.352856
P22105	Tenascin-X OS=Homo sapiens GN=TNXB PE=1 SV=4 - [TENX_HUMAN]	43.8933	2.71	10	6	6	7	1.02789	0.932131	0.849387	0.794823	0.851677	1.26218	1.11095	1.09341	4242	457.932	5.17334	0.834646	0.131851
A8K477	Sulfhydryl oxidase OS=Homo sapiens PE=2 SV=1 - [A8K477_HUMAN]	43.87	10.1	5	5	5	5	1.12447	1.06738	0.942405	0.79773	1.08136	1.04297	1.04318	0.946976	604	66.7683	8.60205	0.955518	0.588812
P01703	Ig lambda chain V-I region NEWM OS=Homo sapiens PE=1 SV=1 - [LV105_HUMAN]	43.5933	17.48	1	1	2	12	1.21304	1.04333	1.05708	1.01205	1.10465	0.862633	0.859734	0.957937	103	10.8975	9.29053	1.14237	0.117244
Q96QS0	Putative matrix cell adhesion molecule-3 OS=Homo sapiens PE=2 SV=1 - [Q96QS0_HUMAN]	43.4567	20.75	7	2	3	15	0.927274	0.885939	1.10489	1.19583	1.23615	0.969963	0.986669	0.801493	159	17.4854	9.29053	1.03005	0.804546
Q53HE2	Triosephosphate isomerase (Fragment) OS=Homo sapiens PE=2 SV=1 - [Q53HE2_HUMAN]	43.44	11.65	7	2	2	2	1.20808	0.999311	0.923999	1.34863	0.906701	1.07575	0.864675	0.825326	249	26.6958	7.32764	1.21971	0.133802
B4DVU9	cDNA FLJ54389, highly similar to Heat shock 70 kDa protein 1 OS=Homo sapiens PE=2 SV=1 - [B4DVU9_HUMAN]	43.36	7.35	22	2	2	2	1.22947	0.983747	1.23267	1.19911	0.678076	0.981463	0.991135	0.954707	544	59.0974	5.51611	1.28849	0.0364459
P02741	C-reactive protein OS=Homo sapiens GN=CRP PE=1 SV=1 - [CRP_HUMAN]	43.2414	20.98	3	5	5	13	0.7353	0.935198	0.797427	0.80448	1.77792	0.942916	1.09646	1.04718	224	25.0227	5.63037	0.672492	0.125091
A0A0J9YX35	Uncharacterized protein (Fragment) OS=Homo sapiens PE=4 SV=1 - [A0A0J9YX35_HUMAN]	43.0887	18.8	1	2	2	9	1.00062	1.20775	0.918407	1.03314	1.17716	0.910759	0.944226	0.915714	117	12.8143	7.85498	1.0537	0.570118
J3KSS4	Cytosolic non-specific dipeptidase (Fragment) OS=Homo sapiens GN=CNDP2 PE=1 SV=1 - [J3KSS4_HUMAN]	43.07	14.55	15	1	1	1	1.70713	1.54664	0.628775	1.33246	1.25266	0.67541	0.581166	0.465645	55	6.40841	9.5249	1.75294	0.110865
A0A0F7TC28	IGHV4-4 protein (Fragment) OS=Homo sapiens GN=IGHV4-4 PE=4 SV=1 - [A0A0F7TC28_HUMAN]	42.7933	20.2	4	2	3	4	0.954734	0.852439	0.943749	0.955587	1.16743	1.0452	0.957583	0.931765	99	10.8336	9.45166	0.903706	0.162705
A2MYC8	V5-2 protein (Fragment) OS=Homo sapiens GN=V5-2 PE=4 SV=1 - [A2MYC8_HUMAN]	42.63	28.85	3	3	3	6	1.34919	1.03198	0.951557	0.880361	0.970445	1.54087	0.725831	0.854015	104	11.0344	7.28369	1.02982	0.889067
P27918	Properdin OS=Homo sapiens GN=CFP PE=1 SV=2 - [PROP_HUMAN]	42.56	11.3	6	5	6	8	0.916568	0.993548	1.18655	1.09213	0.719207	1.22633	0.941479	1.02639	469	51.242	7.89893	1.07106	0.589896
F5H5I5	ATP-binding cassette sub-family B member 9 (Fragment) OS=Homo sapiens GN=ABCB9 PE=4 SV=1 - [F5H5I5_HUMAN]	41.77	10.77	4	1	1	3	0.654011	1.02438	0.815209	0.916131	1.37204	1.07026	1.07126	0.998831	65	7.43285	6.49365	0.755541	0.0526632
A2J1N6	Rheumatoid factor RF-ET9 (Fragment) OS=Homo sapiens PE=2 SV=1 - [A2J1N6_HUMAN]	41.72	40.87	3	2	4	14	0.727629	0.941755	0.965382	1.08886	1.2415	0.851289	0.958811	1.11655	115	12.6182	8.79248	0.89326	0.368198
Q5NV70	V1-11 protein (Fragment) OS=Homo sapiens GN=V1-11 PE=4 SV=1 - [Q5NV70_HUMAN]	41.53	16.49	4	1	1	1	2.30738	0.950169		1.12376		0.918563	1.48947	1.4503	97	10.327	4.58936	1.13556	0.734633
P62805	Histone H4 OS=Homo sapiens GN=HIST1H4A PE=1 SV=2 - [H4_HUMAN]	41.27	11.65	2	1	1	1									103	11.3604	11.356	NA	NA
A2N0U5	VH6DJ protein (Fragment) OS=Homo sapiens GN=VH6DJ PE=2 SV=1 - [A2N0U5_HUMAN]	41.1783	15.6	8	1	3	19	0.956959	1.32077	0.580632	0.611267	0.697493	1.00996	1.29021	1.20214	109	12.1757	5.36377	0.826387	0.436742
P02649	Apolipoprotein E OS=Homo sapiens GN=APOE PE=1 SV=1 - [APOE_HUMAN]	41.1267	21.77	11	7	7	9	1.18135	1.21085	0.901704	0.961965	1.00751	0.714368	1.03059	0.976971	317	36.1318	5.73193	1.14102	0.264705
I3L1J2	Cadherin-5 OS=Homo sapiens GN=CDH5 PE=1 SV=1 - [I3L1J2_HUMAN]	41.1	5.67	6	2	2	5	1.06924	0.96365	0.961338	0.966207	1.03533	1.17588	1.03527	1.06806	406	45.386	5.69385	0.917942	0.0853288
A0A075B6S4	Protein IGKV1D-17 (Fragment) OS=Homo sapiens GN=IGKV1D-17 PE=4 SV=1 - [A0A075B6S4_HUMAN]	41.1	16.24	1	1	1	2									117	12.8264	9.02686	NA	NA
Q5RI18	Heterogeneous nuclear ribonucleoprotein U (Fragment) OS=Homo sapiens GN=HNRNPU PE=1 SV=6 - [Q5RI18_HUMAN]	40.95	9.96	6	1	1	1									241	27.2902	5.43994	NA	NA
Q8IZZ5	Coagulation factor XII-Mie OS=Homo sapiens PE=2 SV=1 - [Q8IZZ5_HUMAN]	40.79	13.98	3	7	7	7	0.663617	0.847303	0.847151	0.920818	1.01845	1.01301	1.09618	1.37872	615	67.6908	7.73779	0.727696	0.0294564
B7Z832	cDNA FLJ51409, highly similar to Thrombospondin-4 OS=Homo sapiens PE=2 SV=1 - [B7Z832_HUMAN]	39.81	3.91	3	1	3	3	1.73471	0.979034	1.21115	1.05751	0.73507	0.810446	0.966093	0.842857	870	95.8867	4.64014	1.48569	0.0924649
Q8NBJ4	Golgi membrane protein 1 OS=Homo sapiens GN=GOLM1 PE=1 SV=1 - [GOLM1_HUMAN]	39.66	5.49	1	2	2	2	1.0204	0.936683	1.00039	1.15242	1.02727	1.09153	0.949355	0.973462	401	45.3058	4.97021	1.01683	0.769794
P09382	Galectin-1 OS=Homo sapiens GN=LGALS1 PE=1 SV=2 - [LEG1_HUMAN]	39.66	11.85	3	2	2	3	0.786901	1.52912	0.689232	0.854211	1.23027	1.16667	0.982489	0.965542	135	14.7062	5.50342	0.888147	0.582755
P49327	Fatty acid synthase OS=Homo sapiens GN=FASN PE=1 SV=3 - [FAS_HUMAN]	39.56	1.51	1	1	1	1									2511	273.254	6.44287	NA	NA
Q8TAK2	Similar to catalase (Fragment) OS=Homo sapiens PE=2 SV=1 - [Q8TAK2_HUMAN]	39.1267	13.16	3	3	3	4	0.825957	1.24239	1.10084	1.08409	0.693519	0.823705	1.10141	1.18017	228	25.922	8.51416	1.11951	0.461297
J3KS93	Eukaryotic initiation factor 4A-I (Fragment) OS=Homo sapiens GN=EIF4A1 PE=1 SV=1 - [J3KS93_HUMAN]	38.81	20	15	1	1	1									85	9.3477	4.42432	NA	NA
P01621	Ig kappa chain V-III region NG9 (Fragment) OS=Homo sapiens PE=2 SV=1 - [KV303_HUMAN]	38.74	54	2	2	4	11	1.40541	0.90354	0.883429	0.926659	0.987016	1.05426	0.986288	1.05803	100	10.7223	6.52197	1.00832	0.950658
A0A087X0S5	Collagen alpha-1(VI) chain OS=Homo sapiens GN=COL6A1 PE=1 SV=1 - [A0A087X0S5_HUMAN]	38.4887	5.17	7	4	4	4	0.92247	1.15789	0.972446	0.995766	0.857037	1.02125	1.02198	1.15123	1026	108.272	5.42725	0.999259	0.992736
B2R773	cDNA, FLJ93312, highly similar to Homo sapiens adipose most abundant gene transcript 1 (APM1), mRNA OS=Homo sapiens PE=2 SV=1 - [B2R773_HUMAN]	38.4509	6.15	2	1	1	4	0.771582	1.07159	1.06303	0.943827	1.01031	1.12474	1.03197	1.07883	244	26.409	5.74463	0.906971	0.259213
G5E9F8	Protein S (Alpha), isoform CRA_b OS=Homo sapiens GN=PROS1 PE=1 SV=1 - [G5E9F8_HUMAN]	37.76	21.1	19	11	11	22	0.982356	0.985752	0.959016	0.958869	1.12911	1.0374	1.019	1.05036	545	60.3176	5.87158	0.917591	0.0318482
Q5NV79	V5-4 protein (Fragment) OS=Homo sapiens GN=V5-4 PE=4 SV=1 - [Q5NV79_HUMAN]	37.61	10.1	2	1	1	2	0.532849	1.09661	0.923282	0.977798	0.487899	1.73239	1.05953	1.23499	99	10.672	5.80811	0.78206	0.432465
P04438	Ig heavy chain V-II region SESS OS=Homo sapiens PE=2 SV=1 - [HV208_HUMAN]	37.6033	10.2	4	1	2	4	1.41977	0.672842	1.15963	0.969732	1.65622	0.72789	0.793485	0.923064	147	16.3122	7.09326	1.03	0.91201
B4DL49	cDNA FLJ58073, moderately similar to Cathepsin B (EC 3.4.22.1) OS=Homo sapiens PE=2 SV=1 - [B4DL49_HUMAN]	37.24	13.19	17	4	4	4	1.05825	1.32856	0.950295	0.968186	0.822216	0.854977	1.14573	0.993675	273	30.7477	6.62451	1.12785	0.32905
B7ZAL5	cDNA, FLJ79229, highly similar to Lactotransferrin (EC 3.4.21.-) OS=Homo sapiens PE=2 SV=1 - [B7ZAL5_HUMAN]	37.21	9.16	16	5	5	6	1.08589	1.5356	0.93062	0.940027	0.803275	0.938888	0.829066	0.867146	666	73.1232	7.78174	1.30686	0.159417
B4DLJ6	cDNA FLJ56989, highly similar to Macrophage receptor MARCO OS=Homo sapiens PE=2 SV=1 - [B4DLJ6_HUMAN]	37.06	3.23	2	1	1	1	1.13275	0.783827	0.729875	0.991496	0.853258	0.937916	1.2411	1.52084	495	49.7028	8.80713	0.799034	0.256899
A0A0B4J2D9	Protein IGKV1D-13 (Fragment) OS=Homo sapiens GN=IGKV1D-13 PE=1 SV=1 - [A0A0B4J2D9_HUMAN]	37.04	13.68	1	1	1	1	1.1052	0.977451	1.2051	1.14861	0.82472	0.784749	0.963565	1.22459	117	12.5613	7.84033	1.16768	0.217941
P01604	Ig kappa chain V-I region Kue OS=Homo sapiens PE=1 SV=1 - [KV112_HUMAN]	36.96	10.19	1	1	1	2	1.03887	0.928664	1.21682	1.19881	0.955841	0.74778	1.09103	1.05216	108	12.119	8.80713	1.13959	0.240215
A0A068LL56	Ig heavy chain variable region (Fragment) OS=Homo sapiens PE=2 SV=1 - [A0A068LL56_HUMAN]	36.42	12.3	1	1	2	10	0.737785	0.893511	0.993081	1.12664	1.60425	0.922766	0.858913	1.02582	122	13.4196	8.42627	0.850408	0.428976
B7Z316	cDNA FLJ51691, highly similar to Intercellular adhesion molecule 2 OS=Homo sapiens PE=2 SV=1 - [B7Z316_HUMAN]	36.2	6.71	9	1	1	2	1.33168	0.845196	0.902949	0.960333	1.00465	1.05703	1.19185	0.918827	149	16.1868	6.23975	0.968128	0.800175
E9PLJ3	Cofilin-1 (Fragment) OS=Homo sapiens GN=CFL1 PE=1 SV=1 - [E9PLJ3_HUMAN]	36.05	10.13	8	1	1	1	0.968511	1.25363	0.998274	1.06163	1.00826	1	0.842663	1.01667	79	9.08474	8.38232	1.10729	0.230791
P01771	Ig heavy chain V-III region HIL OS=Homo sapiens PE=1 SV=1 - [HV310_HUMAN]	36.02	15.7	1	1	2	9	1.06298	0.888646	1.23877	1.10933	1.06408	0.937134	0.900277	1.03844	121	13.5572	9.36377	1.09165	0.326766
P24592	Insulin-like growth factor-binding protein 6 OS=Homo sapiens GN=IGFBP6 PE=1 SV=1 - [IBP6_HUMAN]	35.97	19.58	2	4	4	4	1.23208	1.10325	0.830224	0.977491	1.01864	1.04106	0.93548	0.921736	240	25.3062	7.81104	1.05744	0.572564
A2J1N9	Rheumatoid factor RF-ET12 (Fragment) OS=Homo sapiens PE=2 SV=1 - [A2J1N9_HUMAN]	35.67	26.04	2	2	3	12	0.886281	0.86468	0.93603	0.927214	1.3248	1.33862	0.978322	0.953922	96	10.5221	8.90967	0.786336	0.101571
P43251	Biotinidase OS=Homo sapiens GN=BTD PE=1 SV=2 - [BTD_HUMAN]	35.64	5.71	2	3	3	3	1.76335	0.921044	0.966265	0.905515	0.86906	1.03318	0.895892	0.97723	543	61.0933	6.25244	1.20689	0.420706
A0A0F7SZ86	IGHV2-70 protein (Fragment) OS=Homo sapiens GN=IGHV2-70 PE=4 SV=1 - [A0A0F7SZ86_HUMAN]	35.6	15.56	9	1	2	5	0.712204	1.01088	1.01419	0.888248	1.56024	0.969783	1.0043	1.00258	90	10.156	7.95752	0.798986	0.21828
Q5NV89	V1-7 protein (Fragment) OS=Homo sapiens GN=V1-7 PE=4 SV=1 - [Q5NV89_HUMAN]	35.25	8.08	3	1	1	5	0.505626	2.60279	0.573294	0.601617	1.11623	1.0569	0.627522	0.607024	99	10.2798	7.06396	1.25704	0.703401
H0YLI6	Isocitrate dehydrogenase [NAD] subunit alpha, mitochondrial (Fragment) OS=Homo sapiens GN=IDH3A PE=1 SV=1 - [H0YLI6_HUMAN]	35.18	4.48	1	1	1	8	1.3302	0.879365	0.923546	0.874484	1.48083	0.507702	1.04809	1.15682	134	14.7997	8.104	0.955412	0.847715
B4E3A8	cDNA FLJ53963, highly similar to Leukocyte elastase inhibitor OS=Homo sapiens PE=2 SV=1 - [B4E3A8_HUMAN]	34.95	5.28	2	2	2	2	0.882875	1.66836	1.17339	1.02184	0.825794	1.08295	0.790874	0.618789	341	38.6607	6.66846	1.42995	0.132032
C9J8S2	Retinoic acid receptor responder protein 2 (Fragment) OS=Homo sapiens GN=RARRES2 PE=1 SV=1 - [C9J8S2_HUMAN]	34.9	7.55	2	1	1	1	0.977206	0.881502	1.15712	1.17534	0.989615	1.03591	0.980841	1.01532	159	17.8016	10.2134	1.04202	0.597088
B4E397	cDNA FLJ55140, highly similar to SPARC-like protein 1 OS=Homo sapiens PE=2 SV=1 - [B4E397_HUMAN]	34.88	2.65	6	1	1	2	0.91833	1.1139	0.562411	0.829489	0.9534	1.68683	0.904471	1.04845	490	55.4841	4.84326	0.745427	0.231912
Q9BTY2	Plasma alpha-L-fucosidase OS=Homo sapiens GN=FUCA2 PE=1 SV=2 - [FUCO2_HUMAN]	34.67	2.36	1	1	1	2	0.662668	1.64264	0.716391	1.00811	1.36725	0.605258	1.51134	0.589564	467	54.0321	6.25244	0.989443	0.975259
P07585	Decorin OS=Homo sapiens GN=DCN PE=1 SV=1 - [PGS2_HUMAN]	34.36	7.8	18	3	3	3	0.836494	1.14356	0.872113	0.869708	1.20272	1.14247	1.01488	0.999567	359	39.7218	8.54346	0.85367	0.122627
A0A0K0K1L1	Epididymis secretory protein Li 282 OS=Homo sapiens GN=HEL-S-282 PE=2 SV=1 - [A0A0K0K1L1_HUMAN]	34.35	3.46	2	1	1	2	0.404992	1.05507	1.26367	1.18699	0.208129	0.790775	1.67422	1.50794	260	29.1579	7.73779	0.935422	0.869984
B3KPS3	cDNA FLJ32131 fis, clone PEBLM2000267, highly similar to Tubulin alpha-ubiquitous chain OS=Homo sapiens PE=2 SV=1 - [B3KPS3_HUMAN]	34.29	5.29	17	2	2	2	1.33316	1.36483	0.962108	1.08244	1.19168	0.854551	0.834296	0.554383	416	46.2118	5.12256	1.38049	0.0957609
B9EJA8	Mannose receptor, C type 1-like 1 OS=Homo sapiens GN=MRC1L1 PE=2 SV=1 - [B9EJA8_HUMAN]	33.98	1.44	3	2	2	2	0.885026	1.15421	0.952503	0.998228	0.990207	1.0988	0.940221	1.07243	1456	165.918	6.50732	0.972933	0.699163
C0JYZ2	Titin OS=Homo sapiens GN=TTN PE=4 SV=1 - [C0JYZ2_HUMAN]	33.96	0.13	11	3	4	10	0.689981	1.54732	0.750869	0.685724	1.13254	0.596925	0.57962	0.886828	33423	3711.4	6.52197	1.1492	0.650623
Q6ZNX5	CDNA FLJ26936 fis, clone RCT06808 OS=Homo sapiens PE=2 SV=1 - [Q6ZNX5_HUMAN]	33.93	4.85	1	1	1	2	0.360329	0.700955	1.4231	1.14701	1.68468	1.58887	0.573847	0.632879	165	17.6628	7.51807	0.81031	0.598073
H0Y8C9	ATP-binding cassette sub-family A member 2 (Fragment) OS=Homo sapiens GN=ABCA2 PE=1 SV=1 - [H0Y8C9_HUMAN]	33.74	0.75	5	1	1	1	1.27443	0.861795	1.04406	0.952357	0.839162	1.18133	1.01029	1.07388	1066	118.053	6.354	1.00682	0.953057
Q14520	Hyaluronan-binding protein 2 OS=Homo sapiens GN=HABP2 PE=1 SV=1 - [HABP2_HUMAN]	33.41	10.89	2	6	6	11	1.08959	0.989543	0.984623	0.904284	1.00285	1.13602	0.994834	0.997106	560	62.6304	6.53662	0.960784	0.46064
H0Y512	Adipocyte plasma membrane-associated protein (Fragment) OS=Homo sapiens GN=APMAP PE=1 SV=1 - [H0Y512_HUMAN]	33.15	2.2	2	1	1	1	0.944486	1.0311	1.11644	1.07844	0.970134	0.825187	1.09346	1.14451	409	45.3761	5.65576	1.03372	0.691489
A2N0U1	VH6DJ protein (Fragment) OS=Homo sapiens GN=VH6DJ PE=2 SV=1 - [A2N0U1_HUMAN]	32.9755	14.04	7	1	2	16	1.02038	1.05349	0.945852	0.969073	1.05166	0.914259	1.08627	1.10006	114	12.6221	8.48486	0.960501	0.442381
A2N0T5	VH6DJ protein (Fragment) OS=Homo sapiens GN=VH6DJ PE=2 SV=1 - [A2N0T5_HUMAN]	32.9755	22.61	12	2	3	17	0.928075	1.19444	0.894679	1.0079	1.21502	1.02093	0.956218	0.863259	115	12.7593	8.45557	0.992602	0.942767
P00558	Phosphoglycerate kinase 1 OS=Homo sapiens GN=PGK1 PE=1 SV=3 - [PGK1_HUMAN]	32.49	2.64	1	1	1	2	1.19358	1.52078	1.00545	1.30634	0.861934	0.730301	0.791201	0.757999	417	44.5861	8.104	1.60013	0.0186602
A0N5T0	V<gamma>1 protein (Fragment) OS=Homo sapiens GN=V<gamma>1 PE=4 SV=1 - [A0N5T0_HUMAN]	32.3	11.8	1	1	2	13	0.99214	1.21117	0.911588	1.06916	0.815653	1.09661	0.956517	1.01932	161	17.6193	10.1401	1.07585	0.429726
A4ZU86	Truncated nucleolar phosphoprotein B23 OS=Homo sapiens GN=NPM1 PE=2 SV=1 - [A4ZU86_HUMAN]	32.14	21.9	4	2	2	2									274	29.9596	4.75439	NA	NA
Q86UD1	Out at first protein homolog OS=Homo sapiens GN=OAF PE=2 SV=1 - [OAF_HUMAN]	32.06	3.3	1	1	1	1	0.710474	1.04436	1.07884	0.755748	1.1879	1.16744	0.8868	1.30876	273	30.6686	6.84424	0.788618	0.115718
P01707	Ig lambda chain V-II region TRO OS=Homo sapiens PE=1 SV=1 - [LV204_HUMAN]	32.04	14.41	3	1	2	9	0.841639	0.631679	0.886206	0.95346	1.88526	1.09717	0.636095	0.663201	111	11.5536	8.29443	0.773885	0.472722
A2N2X0	VL6 protein (Fragment) OS=Homo sapiens GN=VL6 PE=4 SV=1 - [A2N2X0_HUMAN]	32.04	17.98	3	1	2	6	0.908643	1.15609	0.80729	0.867399	1.07209	0.775992	1.31614	1.25664	89	9.66467	8.29443	0.845736	0.28782
A2KUC4	UGa8L (Fragment) OS=Homo sapiens GN=IGLV PE=4 SV=1 - [A2KUC4_HUMAN]	31.41	14.29	3	1	2	11	1.46348	1.15772	0.863219	0.802845	0.903781	0.991164	0.92986	0.987943	112	12.1978	5.09717	1.12431	0.493767
P01709	Ig lambda chain V-II region MGC OS=Homo sapiens PE=1 SV=1 - [LV206_HUMAN]	31.1967	14.41	3	1	2	8	1.15903	1.0729	1.08042	0.914675	0.800045	1.04707	0.928995	0.852613	111	11.5505	5.2876	1.16478	0.090143
B7Z2I6	cDNA FLJ57106, highly similar to Transferrin receptor protein 1 OS=Homo sapiens PE=2 SV=1 - [B7Z2I6_HUMAN]	30.9264	3.77	4	2	2	2	1.07914	1.11844	0.914341	0.926826	0.659864	1.13832	1.10321	1.16458	478	53.45	6.69775	0.993114	0.959691
Q5NV80	V3-2 protein (Fragment) OS=Homo sapiens GN=V3-2 PE=4 SV=1 - [Q5NV80_HUMAN]	30.89	18.37	4	1	2	3	1.09044	1.36028	0.958028	0.916118	0.549751	1.34161	0.885889	1.02938	98	10.3611	7.10791	1.1358	0.531775
A0A0B4J1V7	Protein IGHV7-81 (Fragment) OS=Homo sapiens GN=IGHV7-81 PE=4 SV=1 - [A0A0B4J1V7_HUMAN]	30.72	5.98	2	1	1	1	1.17432	0.596927	1.23825	1.17657	1.12476	0.877684	0.987184	1.11366	117	12.9091	7.10791	1.01998	0.90529
Q6UXB8	Peptidase inhibitor 16 OS=Homo sapiens GN=PI16 PE=1 SV=1 - [PI16_HUMAN]	30.45	4.32	2	2	2	3	0.982101	1.0077	1.20438	1.06569	0.807066	0.939532	1.01024	1.02959	463	49.4395	5.38916	1.1249	0.145416
A0A087WYE8	Putative V-set and immunoglobulin domain-containing-like protein IGHV1OR21-1 (Fragment) OS=Homo sapiens GN=IGHV1OR21-1 PE=1 SV=1 - [A0A087WYE8_HUMAN]	30.15	18.8	8	1	2	11	1.27458	1.27858	1.11235	1.20819	0.804855	0.881583	0.804581	0.845732	117	13.0143	8.17725	1.46016	0.000642385
B2R6V9	cDNA, FLJ93141, highly similar to Homo sapiens coagulation factor XIII, A1 polypeptide (F13A1), mRNA OS=Homo sapiens PE=2 SV=1 - [B2R6V9_HUMAN]	30.05	4.78	5	3	3	6	0.894296	0.808305	1.10853	1.00605	1.30074	1.0668	0.93823	1.07206	732	83.1886	5.99854	0.871859	0.211321
A0A024RDA6	Insulin-like growth factor binding protein 7, isoform CRA_a (Fragment) OS=Homo sapiens GN=IGFBP7 PE=4 SV=1 - [A0A024RDA6_HUMAN]	29.35	6.7	2	1	1	2	0.735172	1.2128	0.697137	0.850232	0.91722	1.51441	0.98714	1.1115	194	20.3383	8.54346	0.771694	0.197164
A0A068LKS1	Ig heavy chain variable region (Fragment) OS=Homo sapiens PE=2 SV=1 - [A0A068LKS1_HUMAN]	29.18	25.86	4	1	3	11	0.728553	0.264049	2.28968	2.2304	0.594764	0.79566	0.643172	0.821374	116	12.6883	7.10791	1.931	0.290115
A0A068LL62	Ig heavy chain variable region (Fragment) OS=Homo sapiens PE=2 SV=1 - [A0A068LL62_HUMAN]	29.18	30.51	1	1	3	12	0.765666	0.954015	1.34146	1.25261	1.01924	0.952267	0.782008	1.08	118	12.7583	7.97217	1.12549	0.458263
B7Z6V5	cDNA FLJ50240, highly similar to ADAM DEC1 (EC 3.4.24.-) (Adisintegrin and metalloproteinase domain-like protein decysin 1) OS=Homo sapiens PE=2 SV=1 - [B7Z6V5_HUMAN]	27.8	3.84	2	1	1	1	0.993309	1.12762	0.944439	0.830246	1.21312	0.913613	1.21344	0.958016	391	43.5015	7.00537	0.906235	0.361287
P12259	Coagulation factor V OS=Homo sapiens GN=F5 PE=1 SV=4 - [FA5_HUMAN]	27.69	0.54	2	1	1	1	0.729307	1.36289	0.885488	0.711168	1.50813	0.56076	1.57467	0.841333	2224	251.546	6.04932	0.822297	0.526032
Q9UGM5	Fetuin-B OS=Homo sapiens GN=FETUB PE=1 SV=2 - [FETUB_HUMAN]	27.61	4.97	4	2	2	5	0.714568	0.963804	0.973976	0.998044	0.698707	1.50812	1.10766	1.17082	382	42.028	6.82959	0.813865	0.308666
F5H810	Noelin (Fragment) OS=Homo sapiens GN=OLFM1 PE=1 SV=1 - [F5H810_HUMAN]	27.48	16.35	9	3	3	3	1.26155	0.896796	0.989841	1.11966	0.834883	1.10695	0.957499	0.96512	208	24.206	6.41748	1.10481	0.341006
Q9H804	cDNA FLJ14022 fis, clone HEMBA1003538, weakly similar to COMPLEMENT C1R COMPONENT (EC 3.4.21.41) OS=Homo sapiens PE=2 SV=1 - [Q9H804_HUMAN]	27.46	9.13	5	3	4	4	0.915585	0.966083	1.08826	0.944734	0.916168	1.06676	1.05507	1.00472	438	47.9638	7.45947	0.96834	0.554274
P15169	Carboxypeptidase N catalytic chain OS=Homo sapiens GN=CPN1 PE=1 SV=1 - [CBPN_HUMAN]	26.37	4.8	1	2	2	3	0.947463	0.939661	0.981212	1.01069	1.03574	0.999478	1.03809	1.18883	458	52.2533	7.34229	0.910136	0.103565
Q9NWW3	cDNA FLJ20564 fis, clone KAT12033 OS=Homo sapiens PE=2 SV=1 - [Q9NWW3_HUMAN]	26.37	7.75	14	1	1	1	0.99463	0.991331	1.21482	1.0778	0.932231	0.947943	1.00288	1.05788	129	14.1269	4.88135	1.08577	0.220452
P05362	Intercellular adhesion molecule 1 OS=Homo sapiens GN=ICAM1 PE=1 SV=2 - [ICAM1_HUMAN]	26.32	4.51	5	2	2	2	1.47113	0.969058	0.599976	0.846296	1.09708	0.862621	1.14973	1.17389	532	57.789	7.98682	0.907096	0.640236
B7Z602	cDNA FLJ59408, highly similar to 150 kDa oxygen-regulated protein (Orp150) OS=Homo sapiens PE=2 SV=1 - [B7Z602_HUMAN]	26.28	2.29	6	1	1	1	1.18169	0.812465	0.96425	0.845254	1.44147	0.960372	0.969274	1.06428	656	72.8021	4.89404	0.857691	0.30911
Q5NV82	V4-2 protein (Fragment) OS=Homo sapiens GN=V4-2 PE=4 SV=1 - [Q5NV82_HUMAN]	25.84	8.65	4	1	1	1	1.0542	1.04992	1.33973	0.891733	0.66817	1.00844	0.99253	1.22818	104	11.1354	7.97217	1.11265	0.488541
P08311	Cathepsin G OS=Homo sapiens GN=CTSG PE=1 SV=2 - [CATG_HUMAN]	25.4	3.53	1	1	1	2	0.693208	3.55979	0.984743	0.932099	0.372893	0.761315	0.483113	0.28329	255	28.8191	11.1948	3.24737	0.212172
B2R9V7	Superoxide dismutase [Cu-Zn] OS=Homo sapiens PE=2 SV=1 - [B2R9V7_HUMAN]	25.11	14.58	4	3	3	3	0.784422	1.11989	0.92186	1.16002	1.13776	1.49425	0.944743	0.820189	240	25.8827	6.78564	0.906527	0.57509
B3KX75	cDNA FLJ44930 fis, clone BRAMY3015549, highly similar to Neural cell adhesion molecule L1-like protein (Fragment) OS=Homo sapiens PE=2 SV=1 - [B3KX75_HUMAN]	24.72	1.08	3	1	1	1	1.31606	1.25628	1.35388	1.11972	0.542748	0.950754	1.21788	0.522985	1113	124.679	6.16357	1.55981	0.0694701
Q6PK75	PRSS2 protein (Fragment) OS=Homo sapiens GN=PRSS2 PE=2 SV=1 - [Q6PK75_HUMAN]	24.33	16.04	20	2	2	2	1.02908	0.947881	0.659312	1.0709	1.30267	0.901944	0.771726	1.29892	187	20.092	4.86865	0.866932	0.426307
B7Z2R9	cDNA FLJ52540, highly similar to Lysosome-associated membrane glycoprotein 2 OS=Homo sapiens PE=2 SV=1 - [B7Z2R9_HUMAN]	24.28	2.67	3	1	1	1	1.42557	0.990183	0.978763	0.979258	0.875544	0.771531	1.10792	1.13416	300	32.9588	6.87354	1.12442	0.427914
B4DJI1	L-lactate dehydrogenase OS=Homo sapiens PE=2 SV=1 - [B4DJI1_HUMAN]	24.03	5.9	4	2	2	2	0.756976	1.63108	1.23992	1.24939	1.2014	0.515818	0.753674	0.698084	305	33.5717	8.45557	1.53897	0.115614
B3KXZ9	cDNA FLJ46477 fis, clone THYMU3025118, highly similar to Cell surface glycoprotein MUC18 OS=Homo sapiens PE=2 SV=1 - [B3KXZ9_HUMAN]	23.81	4.14	4	2	2	2	0.97575	1.11562	0.91758	0.733061	0.747919	1.42694	0.903583	1.15173	531	58.9827	5.18604	0.884661	0.50408
Q6EMK4	Vasorin OS=Homo sapiens GN=VASN PE=1 SV=1 - [VASN_HUMAN]	23.44	3.27	1	2	2	2	1.04686	0.934972	1.01434	1.00481	0.915826	0.877146	1.1589	1.24048	673	71.6675	7.38623	0.954437	0.63703
Q13822	Ectonucleotide pyrophosphatase/phosphodiesterase family member 2 OS=Homo sapiens GN=ENPP2 PE=1 SV=3 - [ENPP2_HUMAN]	23.14	2.55	4	2	2	3	1.08033	1.23684	0.981259	0.820711	0.889875	1.18064	0.933121	0.688495	863	98.9296	7.37158	1.11566	0.455587
K7EMN2	6-phosphogluconate dehydrogenase, decarboxylating (Fragment) OS=Homo sapiens GN=PGD PE=1 SV=1 - [K7EMN2_HUMAN]	23.07	3.75	5	1	1	1	0.580453	2.0987	1.04111	1.03924	0.843732	0.832536	0.77687	0.813319	160	17.282	8.44092	1.45669	0.330521
A3KFI2	Neuroblastoma suppressor of tumorigenicity 1 (Fragment) OS=Homo sapiens GN=NBL1 PE=1 SV=1 - [A3KFI2_HUMAN]	22.95	6.42	8	1	1	2	0.633651	1.28783	1.11807	1.01052	1.31905	0.886419	0.893531	0.943245	109	11.8488	5.73193	1.00223	0.990077
A2NYU9	Heavy chain Fab (Fragment) OS=Homo sapiens PE=2 SV=1 - [A2NYU9_HUMAN]	22.88	13.93	1	2	2	3	0.834111	1.06289	1.22075	1.06651	1.1508	0.902744	1.0428	0.825798	122	13.5438	9.48096	1.06679	0.565516
H0Y9Q9	ADP-ribosyl cyclase/cyclic ADP-ribose hydrolase 2 (Fragment) OS=Homo sapiens GN=BST1 PE=1 SV=1 - [H0Y9Q9_HUMAN]	22.61	13.4	5	1	1	1	0.866969	0.934129	0.952106	0.799022	1.86018	0.804648	0.885624	1.08769	97	11.0894	6.29053	0.765682	0.342609
P15090	Fatty acid-binding protein, adipocyte OS=Homo sapiens GN=FABP4 PE=1 SV=3 - [FABP4_HUMAN]	22.4	13.64	2	2	2	2	0.998099	0.827425	0.88761	0.907788	1.07721	0.842476	1.33746	1.29973	132	14.7095	7.13721	0.794776	0.131315
P01615	Ig kappa chain V-II region FR OS=Homo sapiens PE=1 SV=1 - [KV202_HUMAN]	21.63	11.5	1	1	1	1	1.27854	1.12044	1.14244	1.17861	0.850912	0.936558	0.910654	0.817893	113	12.6517	7.94287	1.34205	0.000658549
P19320	Vascular cell adhesion protein 1 OS=Homo sapiens GN=VCAM1 PE=1 SV=1 - [VCAM1_HUMAN]	21.31	11.23	10	8	8	10	1.08878	1.04893	1.0513	1.02693	0.887162	1.07515	1.0083	1.01984	739	81.2243	5.22412	1.05664	0.253261
B3KSS4	cDNA FLJ36858 fis, clone ASTRO2015185, highly similar to POLIOVIRUS RECEPTOR OS=Homo sapiens PE=2 SV=1 - [B3KSS4_HUMAN]	21.12	2.21	5	1	1	1	1.58339	0.814948	0.816877	1.98764	0.555193	0.646231	0.815831	1.0215	362	39.5547	6.66846	1.71264	0.160222
A0A0C4DH36	Protein IGHV3-38 (Fragment) OS=Homo sapiens GN=IGHV3-38 PE=1 SV=1 - [A0A0C4DH36_HUMAN]	20.15	18.97	1	2	2	3	0.967733	1.00919	0.972314	1.1033	1.02603	1.00851	1.07935	0.931847	116	12.7504	9.24658	1.00148	0.973732
B4E1W8	cDNA FLJ60213, highly similar to Tenascin OS=Homo sapiens PE=2 SV=1 - [B4E1W8_HUMAN]	19.77	1.11	9	1	1	1	1.66341	0.812062	1.30878	0.930593	0.665338	1.16145	0.982083	0.818235	1080	118.345	4.88135	1.30033	0.275554
P11021	78 kDa glucose-regulated protein OS=Homo sapiens GN=HSPA5 PE=1 SV=2 - [GRP78_HUMAN]	19.52	3.67	2	2	2	2	1.08083	1.00455	0.98666	1.05331	0.619266	1.14605	1.11923	1.1185	654	72.2884	5.16064	1.03098	0.824988
I2D5I8	Apolipoprotein M (Fragment) OS=Homo sapiens GN=APOM PE=4 SV=1 - [I2D5I8_HUMAN]	19.38	6.98	4	1	1	2	1.14459	1.25273	1.34262	0.981795	0.783845	0.728313	0.99201	0.951561	86	9.31567	8.96826	1.36661	0.0208081
Q5TBF5	Mimecan (Fragment) OS=Homo sapiens GN=OGN PE=1 SV=1 - [Q5TBF5_HUMAN]	19.2	3.36	4	1	1	1	0.921282	0.928156	0.697531	0.881953	1.03218	1.38572	1.15395	1.12839	268	30.4373	8.33838	0.729574	0.0161536
I3L0A1	Cysteine-rich secretory protein 3 (Fragment) OS=Homo sapiens GN=CRISP3 PE=1 SV=1 - [I3L0A1_HUMAN]	19.19	4.19	3	1	1	1	1.10925	1.20225	1.03483	1.09176	0.994119	0.893138	0.788479	1.06699	191	21.6036	8.06006	1.186	0.0576894
P05109	Protein S100-A8 OS=Homo sapiens GN=S100A8 PE=1 SV=1 - [S10A8_HUMAN]	18.9	8.6	1	1	1	2	1.25884	1.14621	1.10485	0.956825	0.827212	0.846441	0.964493	1.03865	93	10.8276	7.03467	1.21518	0.0503546
H7C1V0	Cathepsin D (Fragment) OS=Homo sapiens GN=CTSD PE=1 SV=1 - [H7C1V0_HUMAN]	18.79	4.76	3	1	1	1	1.12022	1.27107	0.960739	0.897945	0.954585	0.956398	1.06969	0.954074	189	20.3585	8.44092	1.08005	0.42782
P83593	Ig kappa chain V-IV region STH (Fragment) OS=Homo sapiens PE=1 SV=1 - [KV405_HUMAN]	17.99	19.27	1	2	2	6	0.971091	0.98766	0.975774	1.08088	0.968923	1.0083	1.00044	1.07631	109	12.0529	7.94287	0.990871	0.796881
Q9Y6Y9	Lymphocyte antigen 96 OS=Homo sapiens GN=LY96 PE=1 SV=2 - [LY96_HUMAN]	17.94	6.25	1	1	1	1	1.29828	0.925376	1.04406	1.1084	1.03233	1.03467	0.87442	0.920584	160	18.5333	8.51416	1.13283	0.210055
A2J1N7	Rheumatoid factor RF-ET10 (Fragment) OS=Homo sapiens PE=2 SV=1 - [A2J1N7_HUMAN]	17.91	18.75	1	2	2	4	1.16483	0.872504	0.995345	1.03306	0.843803	0.962645	1.1075	1.14386	96	10.4892	9.36377	1.00172	0.985383
A2N011	Vh1-D-J3-region (Fragment) OS=Homo sapiens PE=2 SV=1 - [A2N011_HUMAN]	17.17	14.96	7	1	2	12	0.922012	0.889279	1.0356	1.47929	1.06012	0.919834	0.948807	0.894381	127	13.7428	8.47021	1.13157	0.430619
P36222	Chitinase-3-like protein 1 OS=Homo sapiens GN=CHI3L1 PE=1 SV=2 - [CH3L1_HUMAN]	16.72	3.92	1	2	2	2	0.79731	0.987186	0.959971	0.928002	0.953577	1.24237	1.07678	1.17096	383	42.5984	8.45557	0.826283	0.0478424
Q5T619	Zinc finger protein 648 OS=Homo sapiens GN=ZNF648 PE=2 SV=1 - [ZN648_HUMAN]	16.57	2.11	1	1	1	1	0.481243	1.44567	1.19967	1.25496	0.498984	0.648515	1.27898	1.30327	568	62.3011	8.6167	1.1748	0.603595
C9J0T6	Ras-related protein Rab-17 (Fragment) OS=Homo sapiens GN=RAB17 PE=1 SV=1 - [C9J0T6_HUMAN]	13.17	7.69	4	1	1	1	0.416463	1.0764	1.28166	1.02003	0.417963	0.892232	1.48149	1.55947	130	14.5385	6.53662	0.872184	0.686965
Q53HC0	Coiled-coil domain-containing protein 92 OS=Homo sapiens GN=CCDC92 PE=1 SV=2 - [CCD92_HUMAN]	0	8.16	1	1	1	2	1.10416	0.984283	1.10006	0.945996	1.13833	0.949352	1.01447	0.991873	331	36.9383	8.89502	1.01002	0.863647
Q16627	C-C motif chemokine 14 OS=Homo sapiens GN=CCL14 PE=1 SV=1 - [CCL14_HUMAN]	0	11.83	2	1	1	1	0.91295	0.996276	0.752059	1.58498	1.15938	0.757264	0.918358	1.05429	93	10.6713	8.71924	1.09208	0.67827
O75339	Cartilage intermediate layer protein 1 OS=Homo sapiens GN=CILP PE=1 SV=4 - [CILP1_HUMAN]	0	1.94	1	2	2	2	1.39749	0.961971	0.949979	0.797518	0.756215	1.04631	1.20908	1.12069	1184	132.48	8.41162	0.99395	0.970571
P31146	Coronin-1A OS=Homo sapiens GN=CORO1A PE=1 SV=4 - [COR1A_HUMAN]	0	3.47	2	1	1	1	0.941478	0.898637	1.23513	0.963521	1.05772	0.824558	1.30195	1.02974	461	50.9938	6.68311	0.958244	0.735436
P59665	Neutrophil defensin 1 OS=Homo sapiens GN=DEFA1 PE=1 SV=1 - [DEF1_HUMAN]	0	9.57	2	1	1	1	0.76559	2.57592	1.6203	0.902744	0.512677	0.600832	0.555479	0.56288	94	10.1942	6.99072	2.62769	0.116073
Q9UNN8	Endothelial protein C receptor OS=Homo sapiens GN=PROCR PE=1 SV=1 - [EPCR_HUMAN]	0	5.46	1	1	1	1	1.23065	1.11572	1.09629	0.905546	0.95477	1.0382	0.874796	1.003	238	26.6546	7.18115	1.12348	0.182751
P05160	Coagulation factor XIII B chain OS=Homo sapiens GN=F13B PE=1 SV=3 - [F13B_HUMAN]	0	3.03	1	2	2	3	1.18729	0.966475	1.08411	0.955935	0.984476	1.03183	0.993537	1.00412	661	75.4612	6.39209	1.04459	0.47612
P00742	Coagulation factor X OS=Homo sapiens GN=F10 PE=1 SV=2 - [FA10_HUMAN]	0	4.71	3	2	2	3	1.21571	1.02896	0.939541	0.929597	1.1928	0.913193	0.965503	1.11352	488	54.6965	5.93506	0.983039	0.854395
P16930	Fumarylacetoacetase OS=Homo sapiens GN=FAH PE=1 SV=2 - [FAAA_HUMAN]	0	2.15	1	1	1	1	1.15893	0.847861	1.02181	1.32012	0.932131	0.85865	1.01861	1.07017	419	46.3442	6.94678	1.12088	0.345975
Q01469	Fatty acid-binding protein, epidermal OS=Homo sapiens GN=FABP5 PE=1 SV=3 - [FABP5_HUMAN]	0	6.67	1	1	1	1									135	15.1546	7.00537	NA	NA
P01815	Ig heavy chain V-II region COR OS=Homo sapiens PE=1 SV=1 - [HV202_HUMAN]	0	5.83	1	1	1	2	1.36434	0.83816	0.785998	0.836279	1.27543	0.957751	1.06003	1.05099	120	13.2176	6.56592	0.880295	0.437125
P01762	Ig heavy chain V-III region TRO OS=Homo sapiens PE=1 SV=1 - [HV301_HUMAN]	0	8.2	1	1	1	1	1.49249	0.932234	1.08076	1.02578	0.828173	0.969961	1.13797	0.823524	122	13.4635	9.71533	1.20505	0.239884
P01769	Ig heavy chain V-III region GA OS=Homo sapiens PE=1 SV=1 - [HV308_HUMAN]	0	15.57	1	1	1	4	0.991523	0.778618	0.839254	0.968284	1.10499	1.11553	1.21584	0.974925	122	13.1574	9.77393	0.81097	0.0262293
P01778	Ig heavy chain V-III region ZAP OS=Homo sapiens PE=1 SV=1 - [HV317_HUMAN]	0	16.38	1	1	1	3	1.05694	0.995391	1.03627	1.26136	1.01168	0.89786	0.989526	0.862728	116	12.5741	8.51416	1.15573	0.0889504
P01780	Ig heavy chain V-III region JON OS=Homo sapiens PE=1 SV=1 - [HV319_HUMAN]	0	16.52	1	1	1	5	0.995515	1	1.17448	1.14821	0.841934	0.869808	1.06465	0.987785	115	12.5553	9.29053	1.14688	0.0973049
P01854	Ig epsilon chain C region OS=Homo sapiens GN=IGHE PE=1 SV=1 - [IGHE_HUMAN]	0	2.57	1	1	1	1	0.977211	0.775597	1.02311	1.08847	1.04047	1.0434	1.11756	1.14448	428	46.9893	8.06006	0.889298	0.17336
P00995	Serine protease inhibitor Kazal-type 1 OS=Homo sapiens GN=SPINK1 PE=1 SV=2 - [ISK1_HUMAN]	0	10.13	1	1	1	1	0.881239	1.07684	0.921418	0.954904	1.35735	0.732166	1.15013	1.10611	79	8.50118	7.60596	0.882394	0.408423
P08727	Keratin, type I cytoskeletal 19 OS=Homo sapiens GN=KRT19 PE=1 SV=4 - [K1C19_HUMAN]	0	8	45	2	4	5	1.30663	0.95292	0.686819	0.740088	0.853614	0.50506	1.70982	1.49109	400	44.0791	5.13525	0.808553	0.519625
P04431	Ig kappa chain V-I region Walker OS=Homo sapiens PE=1 SV=1 - [KV123_HUMAN]	0	12.4	1	1	1	1	1.84487		1.13855	1.19545	1.01507	1.26578	1.13223	0.831666	129	14.0601	8.96826	1.3126	0.278357
P01708	Ig lambda chain V-II region BUR OS=Homo sapiens PE=1 SV=1 - [LV205_HUMAN]	0	10.09	1	1	1	17	0.997029	1.04849	1.12214	1.11297	0.992747	1.05057	0.953955	1.00119	109	11.4986	7.86963	1.07027	0.101804
P04209	Ig lambda chain V-II region NIG-84 OS=Homo sapiens PE=1 SV=1 - [LV211_HUMAN]	0	21.43	1	2	2	4	1.29039	1.00152	1.18661	0.969026	0.93865	0.937985	0.990419	1.04966	112	11.5736	7.12256	1.13556	0.181086
P01719	Ig lambda chain V-V region DEL OS=Homo sapiens PE=1 SV=1 - [LV501_HUMAN]	0	16.67	1	1	1	1	1.56113	0.722666	1.3026	1.0597	1.05395	1.0389	0.815447	0.781508	108	11.3356	5.36377	1.25935	0.28244
P06317	Ig lambda chain V-VI region SUT OS=Homo sapiens PE=1 SV=1 - [LV603_HUMAN]	0	16.22	1	2	2	2	0.908435	0.929204	0.946134	1.0445	1.167	1.07656	0.973542	0.894564	111	12.2398	5.12256	0.930708	0.339683
O00187	Mannan-binding lectin serine protease 2 OS=Homo sapiens GN=MASP2 PE=1 SV=4 - [MASP2_HUMAN]	0	1.46	1	1	1	1	1.10836	0.994084	1.39398	1.03589	0.908847	0.753617	0.985066	1.09137	686	75.6536	5.63037	1.21209	0.137271
P11226	Mannose-binding protein C OS=Homo sapiens GN=MBL2 PE=1 SV=2 - [MBL2_HUMAN]	0	4.84	1	1	1	1	1.2709	0.990524	1.07036	0.796041	0.860262	0.884817	1.17071	1.20993	248	26.127	5.49072	1.00048	0.997162
P80188	Neutrophil gelatinase-associated lipocalin OS=Homo sapiens GN=LCN2 PE=1 SV=2 - [NGAL_HUMAN]	0	12.12	3	2	2	2	1.45523	1.61557	0.856651	0.920693	0.802186	0.770092	0.922647	0.772333	198	22.5737	8.90967	1.48424	0.127174
P13796	Plastin-2 OS=Homo sapiens GN=LCP1 PE=1 SV=6 - [PLSL_HUMAN]	0	5.74	5	3	3	3	0.656146	1.26807	0.935178	1.30252	1.00333	0.97987	0.848087	1.10009	627	70.2439	5.42725	1.05876	0.739779
P17900	Ganglioside GM2 activator OS=Homo sapiens GN=GM2A PE=1 SV=4 - [SAP3_HUMAN]	0	4.15	1	1	1	1	0.809609	1.23507	0.929385	0.980879	0.817849	1.01621	1.21337	1.1315	193	20.8247	5.31299	0.946625	0.668566
P30531	Sodium- and chloride-dependent GABA transporter 1 OS=Homo sapiens GN=SLC6A1 PE=1 SV=2 - [SC6A1_HUMAN]	0	1.17	1	1	1	1	0.962443	0.799306	1.03374	0.98033	1.26943	0.818063	1.1643	1.19934	599	67.0291	8.08936	0.848315	0.20151
P22314	Ubiquitin-like modifier-activating enzyme 1 OS=Homo sapiens GN=UBA1 PE=1 SV=3 - [UBA1_HUMAN]	0	2.36	1	1	1	1									1058	117.774	5.75732	NA	NA
A0A087WXW9	Collagen alpha-1(V) chain OS=Homo sapiens GN=COL5A1 PE=1 SV=1 - [A0A087WXW9_HUMAN]	0	1.2	4	2	2	2	0.898756	1.25558	0.936171	1.00665	1.24028	0.869875	1.04602	0.87314	1838	183.54	5.07178	1.01713	0.889554
Q7Z4G9	HBxAg-binding protein OS=Homo sapiens GN=HBXBP PE=2 SV=1 - [Q7Z4G9_HUMAN]	0	3.59	2	1	1	1	0.784464	1.31396	2.29302	0.747797	0.739656	0.957114	0.69914	0.775661	306	34.6328	6.29053	1.62011	0.266193
K7ERI9	Apolipoprotein C-I (Fragment) OS=Homo sapiens GN=APOC1 PE=1 SV=1 - [K7ERI9_HUMAN]	0	23.38	6	2	2	2	1.08389	0.924589	1.23715	1.08026	1.22924	0.785654	0.95319	0.934967	77	8.64167	6.7124	1.10838	0.38658
A0A087WWF0	Protein IGHV3-64 OS=Homo sapiens GN=IGHV3-64 PE=4 SV=1 - [A0A087WWF0_HUMAN]	0	20	1	1	1	1	0.889414	1.00219	0.980848	0.957737	1.16046	1.28276	0.839501	1.03637	75	8.29994	8.73389	0.886779	0.289645
A0A075B7B6	Putative V-set and immunoglobulin domain-containing-like protein IGHV4OR15-8 (Fragment) OS=Homo sapiens GN=IGHV4OR15-8 PE=4 SV=1 - [A0A075B7B6_HUMAN]	0	11.11	4	1	2	4	1.62813	0.919067	1.28441	1.0614	0.851785	0.67644	0.999913	0.92521	117	12.9907	9.59814	1.41674	0.0981559
A0A087WWY0	Apolipoprotein(a) OS=Homo sapiens GN=LPA PE=1 SV=1 - [A0A087WWY0_HUMAN]	0	11.38	3	1	1	1	0.997905	0.929909	0.696545	0.715462	0.581229	0.832178	1.78354	1.65067	571	62.5133	5.73193	0.688944	0.297951
F5H6D6	Ubiquitin-protein ligase E3B OS=Homo sapiens GN=UBE3B PE=1 SV=1 - [F5H6D6_HUMAN]	0	2.43	7	1	1	1									247	29.235	8.68994	NA	NA
C9JEE0	Immunoglobulin lambda-like polypeptide 1 (Fragment) OS=Homo sapiens GN=IGLL1 PE=1 SV=1 - [C9JEE0_HUMAN]	0	3.89	1	1	1	4	0.884406	0.94871	1.06395	0.957514	1.37656	0.814014	1.01037	1.1015	180	19.2149	10.6821	0.895887	0.418583
F8WEX7	Carboxylic ester hydrolase OS=Homo sapiens GN=BCHE PE=1 SV=1 - [F8WEX7_HUMAN]	0	2.1	5	1	1	1	0.775475	0.613551	1.24819	1.05607	0.676927	1.42734	1.21046	1.19964	525	58.8889	6.78564	0.818121	0.373342
Q6P163	APOC2 protein OS=Homo sapiens GN=APOC2 PE=1 SV=1 - [Q6P163_HUMAN]	0	25	3	2	2	3	1.00672	0.958882	1.07245	0.990789	1.82231	0.66099	0.85338	0.776061	72	8.14122	4.89404	0.979815	0.943225
F8VYN5	Heterogeneous nuclear ribonucleoprotein A1 (Fragment) OS=Homo sapiens GN=HNRNPA1 PE=1 SV=1 - [F8VYN5_HUMAN]	0	7.08	10	1	1	1	0.83883	1.23523	1.05316	0.992585	1.19208	0.942157	1.10658	0.808151	113	12.8895	7.63525	1.01754	0.885794
F5GY03	SPARC (Fragment) OS=Homo sapiens GN=SPARC PE=1 SV=1 - [F5GY03_HUMAN]	0	8.72	5	1	1	1	1.09584	1.01719	0.843847	0.86076	1.2544	0.893143	1.16243	1.07218	149	17.4585	6.27783	0.871491	0.204638
H0Y455	DNA replication ATP-dependent helicase/nuclease DNA2 (Fragment) OS=Homo sapiens GN=DNA2 PE=1 SV=1 - [H0Y455_HUMAN]	0	2.67	1	1	1	1	0.810009	0.684172	0.768931	0.722595	1.52449	1.51587	0.940307	1.17258	375	42.2544	8.83643	0.579468	0.0293453
A0A0C4DH24	Protein IGKV6-21 (Fragment) OS=Homo sapiens GN=IGKV6-21 PE=1 SV=1 - [A0A0C4DH24_HUMAN]	0	10.53	1	1	1	2	1.13656	0.949227	1.04133	1.11258	1.08568	0.957058	1.05453	0.890568	114	12.4222	7.28369	1.06292	0.347825
Q5NV63	V1-4 protein (Fragment) OS=Homo sapiens GN=V1-4 PE=4 SV=1 - [Q5NV63_HUMAN]	0	16.16	2	1	1	3	1.52693	1.01258	1.18791	1.29364	0.668732	0.791222	0.929286	0.999882	99	10.3378	5.87158	1.48185	0.0238187
F8WE65	Peptidyl-prolyl cis-trans isomerase OS=Homo sapiens GN=PPIA PE=1 SV=1 - [F8WE65_HUMAN]	0	15	7	2	2	2	0.855512	1.28283	1.02998	0.990012	1.09393	0.983159	1.11041	0.789237	120	13.0133	6.771	1.04603	0.707068
J3KSI6	Desmoglein-2 OS=Homo sapiens GN=DSG2 PE=1 SV=1 - [J3KSI6_HUMAN]	0	4.31	2	1	1	1	1.10201	0.968278	1.15673	0.914348	1.04457	0.881056	1.01807	1.15176	232	25.9227	6.41748	1.01099	0.892079
Q86W61	VCAN protein OS=Homo sapiens GN=VCAN PE=1 SV=1 - [Q86W61_HUMAN]	0	2.82	7	1	1	2	1.18135	1.02567	0.915272	0.939802	1.35634	0.919607	0.914721	0.956658	354	39.2395	7.12256	0.979267	0.867933
E9PP36	60S ribosomal protein L8 OS=Homo sapiens GN=RPL8 PE=1 SV=1 - [E9PP36_HUMAN]	0	17.57	3	1	1	3									148	16.17	11.8979	NA	NA
K7ELP7	Keratin, type I cytoskeletal 17 (Fragment) OS=Homo sapiens GN=KRT17 PE=1 SV=1 - [K7ELP7_HUMAN]	0	12.24	3	1	1	3	1.66925	0.608074	0.849787	0.85094	0.908179	1.22881	1.18626	1.01246	49	5.50775	4.58936	0.917647	0.7347
G8JLJ2	Superoxide dismutase [Mn], mitochondrial (Fragment) OS=Homo sapiens GN=SOD2 PE=1 SV=1 - [G8JLJ2_HUMAN]	0	13.11	12	1	1	1	0.785374	1.23729	0.740782	0.923113	0.928887	1.35289	1.04043	1.07112	61	6.76845	7.57666	0.839062	0.26728
B4DFW2	Metalloproteinase inhibitor 2 OS=Homo sapiens GN=TIMP2 PE=1 SV=1 - [B4DFW2_HUMAN]	0	16.78	4	3	3	4	0.914875	1.05369	0.934847	0.918433	0.913154	1.29097	0.991825	1.08611	143	16.0707	6.30322	0.892574	0.262089
H3BUA5	Uncharacterized protein (Fragment) OS=Homo sapiens PE=4 SV=2 - [H3BUA5_HUMAN]	0	5	1	1	1	2	0.367494	0.514893	0.840503	0.792243	1.74253	1.41559	1.43303	1.03326	140	15.5417	8.76318	0.447111	0.00632128
A0A087WZP6	Nidogen-2 OS=Homo sapiens GN=NID2 PE=1 SV=1 - [A0A087WZP6_HUMAN]	0	1.14	4	1	1	1	0.911243	0.655179	0.800292	0.947271	1.06419	0.853126	1.90075	1.10665	969	106.975	5.69385	0.67269	0.177804
E9PNW4	CD59 glycoprotein OS=Homo sapiens GN=CD59 PE=1 SV=1 - [E9PNW4_HUMAN]	0	27.78	4	3	3	3	0.958372	1.08419	0.942534	1.03808	0.9029	1.09536	0.923152	1.07088	108	11.9765	5.74463	1.00777	0.901529
G3V2V8	Epididymal secretory protein E1 (Fragment) OS=Homo sapiens GN=NPC2 PE=1 SV=1 - [G3V2V8_HUMAN]	0	7.38	10	1	1	1	0.823289	1.2914	0.851969	0.989227	0.869774	1.29238	1.05451	0.929128	122	13.0697	8.33838	0.953932	0.748548
H0Y4N6	Neuropilin-1 (Fragment) OS=Homo sapiens GN=NRP1 PE=4 SV=1 - [H0Y4N6_HUMAN]	0	9	12	1	1	1									100	10.7511	5.88428	NA	NA
C9J1D9	Interleukin-1 receptor accessory protein (Fragment) OS=Homo sapiens GN=IL1RAP PE=1 SV=1 - [C9J1D9_HUMAN]	0	6.9	3	1	1	1	1.30175	0.779262	0.923422	1.05287	1.01786	1.03983	1.10053	1.0302	145	17.1664	5.56689	0.968489	0.787582
A0A0A0MS14	Protein IGHV1-45 (Fragment) OS=Homo sapiens GN=IGHV1-45 PE=1 SV=1 - [A0A0A0MS14_HUMAN]	0	5.13	1	1	1	1	1.15891	1.08159	0.986901	0.910172	1.2744	1.01937	0.724236	1.03691	117	13.4995	9.1001	1.02072	0.874235
A0A0A0MSY2	General transcription factor II-I repeat domain-containing protein 2A OS=Homo sapiens GN=GTF2IRD2 PE=1 SV=1 - [A0A0A0MSY2_HUMAN]	0	1.05	1	1	1	2	1.36897	0.943388	0.893433	0.995709	1.04678	0.667051	0.932191	1.29204	949	107.099	5.68115	1.06679	0.711111
A0A0A0MT36	Protein IGKV6D-21 (Fragment) OS=Homo sapiens GN=IGKV6D-21 PE=4 SV=1 - [A0A0A0MT36_HUMAN]	0	10.53	2	1	1	3	1.16075	0.85305	0.990676	0.887757	1.31601	0.86793	1.02805	1.13485	114	12.3322	7.28369	0.89556	0.371591
A0A0A0MT89	Protein IGKJ1 (Fragment) OS=Homo sapiens GN=IGKJ1 PE=4 SV=1 - [A0A0A0MT89_HUMAN]	0	69.23	1	1	1	5	1.06439	1.03178	1.14448	0.94028	0.994417	0.824334	0.884478	0.941447	13	1.50274	8.83643	1.14741	0.0538659
A0A0A0MT69	Protein IGKJ4 (Fragment) OS=Homo sapiens GN=IGKJ4 PE=1 SV=1 - [A0A0A0MT69_HUMAN]	0	66.67	1	1	1	4	0.876291	0.863522	1.21933	1.06304	0.806793	1.3825	1.01965	0.916037	12	1.24871	8.83643	0.974794	0.869593
F8VV32	Lysozyme OS=Homo sapiens GN=LYZ PE=1 SV=1 - [F8VV32_HUMAN]	0	20.19	3	2	2	2	0.900217	1.17935	1.12888	1.02166	0.966016	1.13291	0.894295	0.879685	104	11.4807	9.0708	1.09218	0.333516
A0A0A0MTR1	Cadherin-13 OS=Homo sapiens GN=CDH13 PE=1 SV=2 - [A0A0A0MTR1_HUMAN]	0	1.57	3	1	1	1	1.03362	1.48972	0.637366	0.869084	1.29264	1.08755	0.987335	0.707605	701	76.9212	4.95752	0.988714	0.959777
A0A0A0MT96	Protein IGKJ3 (Fragment) OS=Homo sapiens GN=IGKJ3 PE=1 SV=1 - [A0A0A0MT96_HUMAN]	0	69.23	1	1	1	3	1.61812	0.9835	1.1406	0.966821	0.696733	0.944727	0.809034	0.995978	13	1.41871	8.83643	1.36612	0.128443
V9HWC6	Peptidyl-prolyl cis-trans isomerase OS=Homo sapiens GN=HEL-S-39 PE=2 SV=1 - [V9HWC6_HUMAN]	0	6.25	2	1	1	1	1.30083	1.50062	0.908362	1.11783	0.933755	0.843839	0.809511	0.757294	208	22.728	9.31982	1.44335	0.0561884
A0A024R609	Pyruvate kinase OS=Homo sapiens GN=PKM2 PE=3 SV=1 - [A0A024R609_HUMAN]	0	6.38	16	2	2	2	0.888011	1.47785	0.719404	1.32942	0.796616	1.01324	1.12692	0.639398	345	37.5343	6.39209	1.23434	0.364263
C9J7H8	L-lactate dehydrogenase B chain (Fragment) OS=Homo sapiens GN=LDHB PE=1 SV=6 - [C9J7H8_HUMAN]	0	5.88	3	1	1	1	0.901211	0.936092	1.23276	1.01722	1.29232	0.777602	0.968227	1.10168	136	14.7249	5.5415	0.987198	0.923459
Q5NV68	V4-1 protein (Fragment) OS=Homo sapiens GN=V4-1 PE=4 SV=1 - [Q5NV68_HUMAN]	0	10.58	2	1	1	2	1.20632	1.12358	1.16271	1.14808	0.872752	0.946526	0.809349	0.950147	104	11.2313	4.71631	1.29673	0.00141844
O43234	Rheumatoid factor RF-ET13 (Fragment) OS=Homo sapiens PE=2 SV=1 - [O43234_HUMAN]	0	14.43	4	2	2	4	0.95814	1.35627	1.22834	1.22078	1.02811	0.932375	0.708351	0.770233	97	10.7414	9.20264	1.3854	0.0251736
B2RBZ5	cDNA, FLJ95778, highly similar to Homo sapiens serpin peptidase inhibitor, clade A (alpha-1 antiproteinase, antitrypsin), member 10 (SERPINA10), mRNA OS=Homo sapiens PE=2 SV=1 - [B2RBZ5_HUMAN]	0	1.8	3	1	1	1	1.01457	0.895705	0.954036	1.08384	1.12917	0.935299	1.07477	1.1124	444	50.6422	8.51416	0.928958	0.25362
O00557	Neural cell adhesion molecule (Fragment) OS=Homo sapiens PE=2 SV=1 - [O00557_HUMAN]	0	3.16	8	1	1	1	1.09883	0.880599	0.942448	0.863306	0.898996	1.39823	1.30038	0.826867	348	38.9076	4.81787	0.855561	0.355618
A2NYV1	Heavy chain Fab (Fragment) OS=Homo sapiens PE=2 SV=1 - [A2NYV1_HUMAN]	0	14.06	3	1	2	20	1.02693	0.977881	1.0206	1.11333	1.13346	0.83064	1.04932	1.0313	128	14.2709	6.53662	1.02349	0.750794
A0A068LN03	Ig heavy chain variable region (Fragment) OS=Homo sapiens PE=2 SV=1 - [A0A068LN03_HUMAN]	0	27.5	3	2	3	23	1.2151	1.00334	1.02073	0.974115	0.925919	0.884309	1.05325	0.934549	120	13.3755	8.42627	1.10927	0.17277
Q53G71	Calreticulin variant (Fragment) OS=Homo sapiens PE=2 SV=1 - [Q53G71_HUMAN]	0	12.56	6	3	3	3	0.750276	1.72313	1.15825	1.04405	1.01853	0.736292	0.806845	0.859511	406	46.8901	4.44971	1.36616	0.223715
B4DP96	cDNA FLJ51269, highly similar to Aminopeptidase N (EC 3.4.11.2) OS=Homo sapiens PE=2 SV=1 - [B4DP96_HUMAN]	0	2.07	6	1	1	1	1.40734	0.96655	1.03196	0.904141	0.924382	1.01968	1.09757	0.913675	482	55.9419	5.36377	1.08948	0.506286
B4DMZ5	cDNA FLJ57826, moderately similar to Cholesteryl ester transfer protein OS=Homo sapiens PE=2 SV=1 - [B4DMZ5_HUMAN]	0	2.08	4	1	1	1	0.975894	0.832074	1.43513	0.90721	1.04653	1.06775	0.940788	1.05551	433	47.7707	6.01123	1.00924	0.949415
X6RLJ0	Complement C1q subcomponent subunit A (Fragment) OS=Homo sapiens GN=C1QA PE=1 SV=5 - [X6RLJ0_HUMAN]	0	4.55	2	1	1	2	0.85239	1.03785	1.00338	1.01486	0.925384	1.13245	1.11559	1.04369	220	23.3369	9.17334	0.926725	0.268845
I6L957	HNRNPA2B1 protein OS=Homo sapiens GN=HNRNPA2B1 PE=2 SV=1 - [I6L957_HUMAN]	0	3.21	5	1	1	1	1.21311	1.17983	0.950492	1.24638	0.936843	0.80818	0.951446	0.912524	249	28.3941	4.85596	1.27154	0.0269758
B3KP65	cDNA FLJ31257 fis, clone KIDNE2005676, highly similar to Homo sapiens leucine-rich repeats and calponin homology (CH) domain containing 3 (LRCH3), mRNA OS=Homo sapiens PE=2 SV=1 - [B3KP65_HUMAN]	0	3.49	5	1	1	1	0.998625	1.01681	0.973055	1.01427	1.08273	1.21047	1	0.881094	372	41.4704	8.14795	0.959032	0.582915
B3KQB8	cDNA FLJ90160 fis, clone HEMBB1002661, highly similar to Hairy/enhancer-of-split related with YRPW motif 1 OS=Homo sapiens PE=2 SV=1 - [B3KQB8_HUMAN]	0	6.58	3	1	1	1	1.01551	0.62387		0.519916	1.83999	1.54922	1.97266	0.622539	304	32.6197	8.95361	0.481203	0.0800748
B4DS32	cDNA FLJ56236, highly similar to Exportin-2 OS=Homo sapiens PE=2 SV=1 - [B4DS32_HUMAN]	0	5.1	4	1	1	1									569	64.3415	5.69385	NA	NA
B3KQA8	cDNA FLJ90059 fis, clone HEMBA1003230, highly similar to Fibulin-5 OS=Homo sapiens PE=2 SV=1 - [B3KQA8_HUMAN]	0	3.98	5	1	1	1	0.940004	1.22121	0.898717	0.819918	0.838545	1.3699	1.05188	0.990129	201	23.1549	5.60498	0.912726	0.538693
B4DVK5	cDNA FLJ54759, highly similar to DNA replication licensing factor MCM5 OS=Homo sapiens PE=2 SV=1 - [B4DVK5_HUMAN]	0	5.83	8	1	1	1									412	44.9519	8.57275	NA	NA
A1L407	Histone cluster 1, H1t OS=Homo sapiens GN=HIST1H1T PE=2 SV=1 - [A1L407_HUMAN]	0	5.31	9	1	1	1	1.1339	1.14215	0.929679	0.931777	0.973854	1.14534	1.18967	0.749987	207	22.0197	11.7222	1.01946	0.871931
J3K000	PEPD protein OS=Homo sapiens GN=PEPD PE=2 SV=1 - [J3K000_HUMAN]	0	3.25	2	1	1	1	1.32329	1.19416	0.791754	0.928696	0.85397	0.997911	1.12639	0.978862	493	54.5469	5.99854	1.07101	0.624774
B4DUI7	cDNA FLJ55004, highly similar to Complement-activating component of Ra-reactive factor (EC 3.4.21.-) OS=Homo sapiens PE=2 SV=1 - [B4DUI7_HUMAN]	0	11.02	5	3	3	3	1.07487	0.934511	0.98314	1.04689	1.01253	1.07275	1.09685	1.13579	354	40.629	4.62744	0.935402	0.139654
O43666	Cytoplasmic linker protein CLIP-170 (Fragment) OS=Homo sapiens GN=CLIP-170 PE=2 SV=1 - [O43666_HUMAN]	0	16	14	1	1	1	0.963352	0.904266	1.1174	1.03335	1.00738	0.978944	1.03162	1.17202	50	5.85594	4.58936	0.958711	0.517021
B4DSX2	cDNA FLJ60144, highly similar to Complement component C1q receptor OS=Homo sapiens PE=2 SV=1 - [B4DSX2_HUMAN]	0	6.34	4	1	1	1	1.04593	1.17952	0.866214	1.16179	0.421798	0.950323	1.19127	1.33344	347	36.5906	6.29053	1.09189	0.697045
B4DQA0	cDNA FLJ57560, highly similar to L-selectin OS=Homo sapiens PE=2 SV=1 - [B4DQA0_HUMAN]	0	4.92	5	2	2	2	1.0642	1.0839	1.15755	0.948588	0.92767	1.11901	0.914035	0.969209	325	36.3182	6.22705	1.0827	0.250647
B7ZMJ3	ADAMTSL4 protein OS=Homo sapiens GN=ADAMTSL4 PE=2 SV=1 - [B7ZMJ3_HUMAN]	0	0.97	2	1	1	1	0.814942	1.00934	0.871527	1.01416	1.06791	1.25738	1.13495	0.968295	1035	111.96	8.27979	0.83785	0.0638962
Q5IWS5	Intelectin 1 OS=Homo sapiens GN=ITLN1 PE=2 SV=1 - [Q5IWS5_HUMAN]	0	7.03	2	2	2	3	1.44439	0.873357	1.04793	0.703158	0.84605	1.20857	1.32699	1.03537	313	34.9553	5.8208	0.920987	0.665178
B2MUD5	Neutrophil elastase (Fragment) OS=Homo sapiens GN=ELA2 PE=3 SV=1 - [B2MUD5_HUMAN]	0	7.81	2	2	2	3	0.595832	2.30965	1.00355	0.955702	0.625785	1.06202	0.87569	0.7618	192	20.6487	8.89502	1.46302	0.385797
W6MEN4	Beta-1,4-galactosyltransferase 1 OS=Homo sapiens GN=B4GALT1 PE=2 SV=1 - [W6MEN4_HUMAN]	0	9.13	8	2	2	3	0.903702	1.00308	0.933202	0.84091	1.33375	1.05373	1.07753	0.952847	219	23.3602	8.99756	0.832994	0.103365
A0A059QQL5	NADH-ubiquinone oxidoreductase chain 1 OS=Homo sapiens GN=ND1 PE=3 SV=1 - [A0A059QQL5_HUMAN]	0	3.14	2	1	1	2	1.14147	0.995645	0.973072	1.31781	0.776405	0.935719	0.893321	1.15496	318	35.551	5.93506	1.17766	0.187506
B4DF39	Receptor expression-enhancing protein OS=Homo sapiens PE=2 SV=1 - [B4DF39_HUMAN]	0	8.61	2	1	1	1	0.786151	1.06842	0.978169	0.781036	0.983718	1.24695	1.21678	1.0894	151	16.8336	4.94482	0.796341	0.0500269
B4DNT5	cDNA FLJ60316, highly similar to Apolipoprotein-L1 OS=Homo sapiens PE=2 SV=1 - [B4DNT5_HUMAN]	0	2.89	34	1	1	1	0.908758	0.827709	0.973881	1.29586	1.13368	1.01432	0.883181	1.13549	277	30.7913	8.66064	0.961834	0.751918
A2NYU7	Heavy chain Fab (Fragment) OS=Homo sapiens PE=2 SV=1 - [A2NYU7_HUMAN]	0	11.02	1	1	1	1	1.20962	0.735353	1.08247	1.09557	0.940339	0.881148	1.16106	1.16013	127	13.9831	9.24658	0.995413	0.971293
B7ZAY6	cDNA, FLJ79350, highly similar to Protein transport protein Sec24C OS=Homo sapiens PE=2 SV=1 - [B7ZAY6_HUMAN]	0	5.26	4	1	1	1									342	38.1295	7.54736	NA	NA
A2NH53	Immunogobulin kappa, VJ region (Fragment) OS=Homo sapiens PE=4 SV=1 - [A2NH53_HUMAN]	0	18.75	3	1	1	1	0.741144	1.33183	1.03736	0.899665	0.926034	1.1293	1.0503	1.00675	112	12.188	8.51416	0.975195	0.85738
Q49A61	MST1 protein OS=Homo sapiens GN=MST1 PE=2 SV=1 - [Q49A61_HUMAN]	0	14.36	8	2	2	2	0.933706	0.948619	0.883442	0.902392	0.953606	1.31591	1.11764	1.00346	188	21.4058	6.50732	0.835345	0.10846
Q7Z7N0	Truncated coagulation factor IX (Fragment) OS=Homo sapiens GN=F9 PE=4 SV=1 - [Q7Z7N0_HUMAN]	0	17.78	7	1	1	1	0.849678	0.800275	0.970073	0.928058	1.10464	1.21784	1.19305	1.1187	45	4.9134	4.43701	0.76548	0.00163905
C1PHC3	CD44 molecule (Fragment) OS=Homo sapiens GN=CD44 PE=4 SV=1 - [C1PHC3_HUMAN]	0	37.78	12	2	2	2	1.03116	0.92821	0.911798	1.00028	1.00633	1.00458	1.12352	1.17665	45	5.04749	8.57275	0.897727	0.0844106
L8EAW2	Alternative protein DKFZp686L13185 OS=Homo sapiens GN=DKFZp686L13185 PE=4 SV=1 - [L8EAW2_HUMAN]	0	18.82	1	1	1	1	1.29233	0.927288	0.381301	1.4454	1.46841	0.498701	1.12353	1.0407	85	9.23983	5.78271	0.978945	0.946423
A2NB43	Cold agglutinin FS-1 H-chain (Fragment) OS=Homo sapiens GN=IGH@ PE=2 SV=1 - [A2NB43_HUMAN]	0	7.63	1	1	1	1	1.42199	0.998156	1.29289	1.02108	0.830326	0.624986	1.04153	1.08034	118	13.0447	9.40771	1.32346	0.0983625
A0N2N3	Burkitt's lymphoma translocation t(2;8) encoding kappa light chain, . Chromosome 8q+ break point (Fragment) OS=Homo sapiens PE=4 SV=1 - [A0N2N3_HUMAN]	0	61.54	2	1	1	1	1.02859	2.3067	0.73463	0.627675	0.54236	0.937934	0.960374	0.896354	13	1.51787	10.8433	1.40857	0.449391
Q86SR2	AZU1 protein (Fragment) OS=Homo sapiens GN=AZU1 PE=2 SV=1 - [Q86SR2_HUMAN]	0	4.87	2	1	1	1	1.01365	1.65852	1.0056	1.00984	0.865442	0.854694	0.930494	0.797494	226	24.6554	10.6235	1.36031	0.150659
Q29843	MRNA for the histocompatibility antigen (HLA-B) (Fragment) OS=Homo sapiens PE=2 SV=1 - [Q29843_HUMAN]	0	27.66	2289	1	1	2	0.783696	0.936888	1.01009	1.09908	1.00227	1.08342	1.03391	1.12112	47	5.3326	5.21143	0.903302	0.227295
Q7M4S4	Granulocyte inhibitory protein OS=Homo sapiens PE=1 SV=1 - [Q7M4S4_HUMAN]	0	90	1	1	1	3	1.25536	0.84009	1.09993	1.02621	0.776789	0.872566	1.04088	1.2283	20	2.04501	4.50049	1.07706	0.586654
A8K7G6	cDNA FLJ75763, highly similar to Homo sapiens regenerating islet-derived 1 alpha (pancreatic stone protein, pancreatic thread protein) (REG1A), mRNA OS=Homo sapiens PE=2 SV=1 - [A8K7G6_HUMAN]	0	3.61	3	1	1	1	0.643088	1.37418	0.796381	0.836247	0.853896	0.727499	1.38787	1.4774	166	18.7198	5.52881	0.820738	0.450574
